# Supplementary material for: Predicting the Evolution of COVID-19 Mortality Risk: a Recurrent Neural Network Approach
Source: bioRxiv or medRxiv preprint supplement (doi:10.1101/2020.12.22.20244061), 2021-01-11
Supplement: Supplementary file [file media-1.pdf]

# Predicting the Evolution of COVID-19 Mortality Risk: a Recurrent Neural Network Approach

## Additional Material

November 2020

### Contents

|          |                                       |           |
|----------|---------------------------------------|-----------|
| <b>1</b> | <b>Dataset Information</b>            | <b>1</b>  |
| <b>2</b> | <b>HM</b>                             | <b>3</b>  |
| 2.1      | Random Forest Daily Results . . . . . | 3         |
| 2.2      | SVC Daily Results . . . . .           | 15        |
| 2.3      | Ensemble Daily Results . . . . .      | 29        |
| <b>3</b> | <b>H12O</b>                           | <b>33</b> |
| 3.1      | Random Forest Daily Results . . . . . | 33        |
| 3.2      | SVC Daily Results . . . . .           | 45        |
| 3.3      | Ensemble Daily Results . . . . .      | 57        |

### 1 Dataset Information

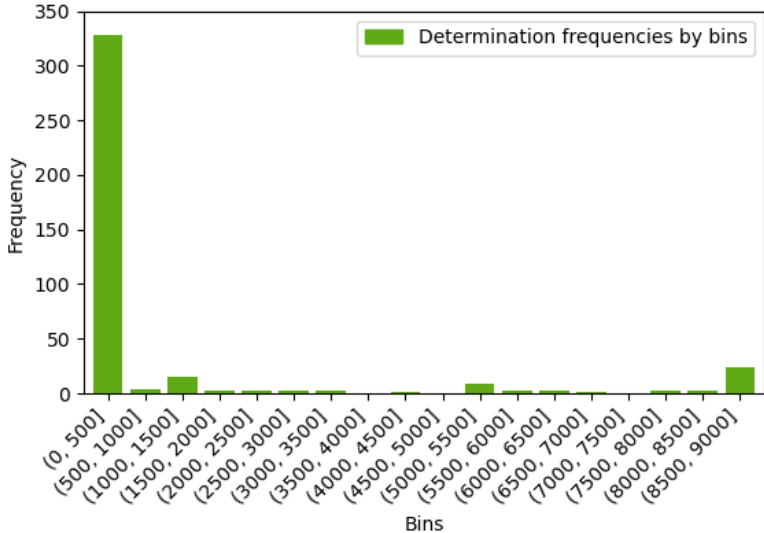

Figure 1: Laboratory determinations histogram in HM dataset.

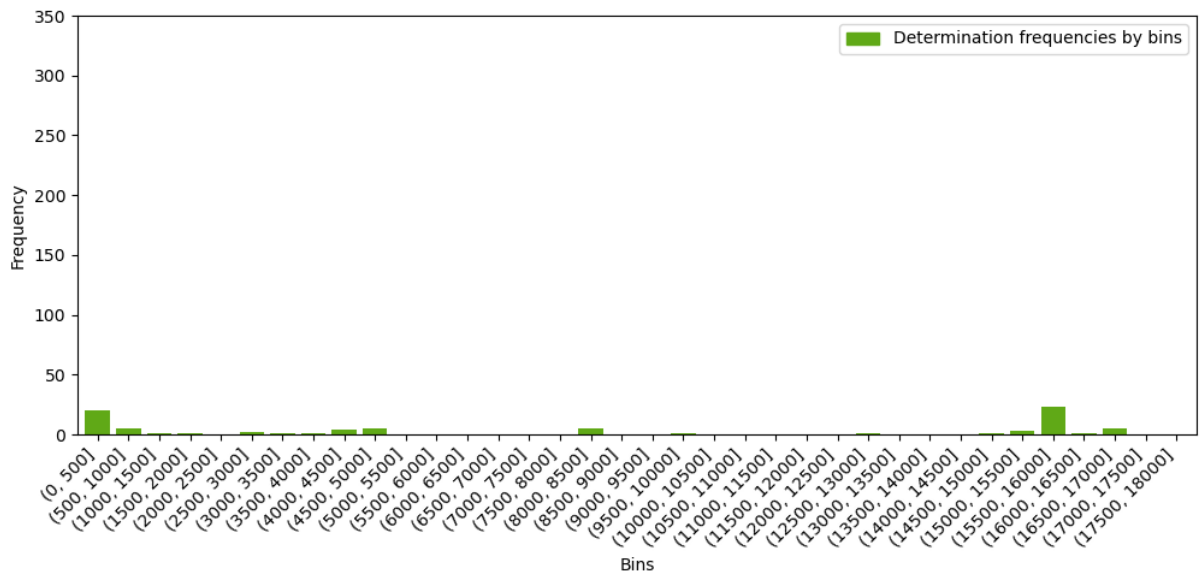

Figure 2: Laboratory determinations histogram in H2O dataset.

## 2 HM

### 2.1 Random Forest Daily Results

| Day | Corrects     | Totals | Accuracy      | AUC           | Sensitivity   | Specificity   | F1            |
|-----|--------------|--------|---------------|---------------|---------------|---------------|---------------|
| 1   | 169.8±1.3038 | 194    | 0.8753±0.0067 | 0.6960±0.0186 | 0.4242±0.0371 | 0.9677±0.0028 | 0.7319±0.0188 |
| 2   | 170.2±0.8367 | 194    | 0.8773±0.0043 | 0.6876±0.0102 | 0.4000±0.0254 | 0.9752±0.0076 | 0.7276±0.0092 |
| 3   | 168.0±0.7071 | 187    | 0.8984±0.0038 | 0.7373±0.0023 | 0.5000±0.0000 | 0.9745±0.0045 | 0.7769±0.0056 |
| 4   | 167.2±0.8367 | 180    | 0.9289±0.0046 | 0.7988±0.0140 | 0.6069±0.0308 | 0.9907±0.0059 | 0.8460±0.0108 |
| 5   | 149.0±1.4142 | 160    | 0.9313±0.0088 | 0.8170±0.0248 | 0.6444±0.0497 | 0.9895±0.0041 | 0.8595±0.0210 |
| 6   | 133.6±1.3416 | 142    | 0.9408±0.0094 | 0.8540±0.0212 | 0.7200±0.0400 | 0.9880±0.0047 | 0.8877±0.0190 |
| 7   | 109.4±0.8944 | 117    | 0.9350±0.0076 | 0.8676±0.0194 | 0.7565±0.0389 | 0.9787±0.0000 | 0.8903±0.0149 |
| 8   | 92.2±0.8367  | 100    | 0.9220±0.0084 | 0.8350±0.0220 | 0.6947±0.0440 | 0.9753±0.0000 | 0.8622±0.0176 |
| 9   | 71.8±0.8367  | 79     | 0.9089±0.0106 | 0.8310±0.0251 | 0.7000±0.0523 | 0.9619±0.0087 | 0.8500±0.0198 |
| 10  | 56.4±0.8944  | 62     | 0.9097±0.0144 | 0.8468±0.0241 | 0.7385±0.0421 | 0.9551±0.0091 | 0.8588±0.0230 |
| 11  | 49.0±0.0000  | 54     | 0.9074±0.0000 | 0.8512±0.0000 | 0.7500±0.0000 | 0.9524±0.0000 | 0.8619±0.0000 |
| 12  | 44.0±0.7071  | 50     | 0.8800±0.0141 | 0.8298±0.0209 | 0.7333±0.0373 | 0.9263±0.0118 | 0.8336±0.0201 |
| 13  | 38.2±0.4472  | 44     | 0.8682±0.0102 | 0.7736±0.0062 | 0.6250±0.0000 | 0.9222±0.0124 | 0.7765±0.0126 |
| 14  | 31.6±0.8944  | 37     | 0.8541±0.0242 | 0.7802±0.0346 | 0.6500±0.0559 | 0.9103±0.0189 | 0.7828±0.0348 |
| 15  | 26.2±0.4472  | 31     | 0.8452±0.0144 | 0.7583±0.0319 | 0.6000±0.0639 | 0.9167±0.0000 | 0.7684±0.0263 |
| 16  | 23.8±0.8367  | 28     | 0.8500±0.0299 | 0.7667±0.0391 | 0.6000±0.0639 | 0.9333±0.0261 | 0.7849±0.0410 |
| 17  | 19.2±0.4472  | 23     | 0.8348±0.0194 | 0.7373±0.0373 | 0.5333±0.0745 | 0.9412±0.0000 | 0.7597±0.0341 |
| 18  | 14.0±0.0000  | 16     | 0.8750±0.0000 | 0.8333±0.0000 | 0.7500±0.0000 | 0.9167±0.0000 | 0.8333±0.0000 |
| 19  | 9.0±0.0000   | 11     | 0.8182±0.0000 | 0.8036±0.0000 | 0.7500±0.0000 | 0.8571±0.0000 | 0.8036±0.0000 |
| 20  | 8.0±0.0000   | 10     | 0.8000±0.0000 | 0.7917±0.0000 | 0.7500±0.0000 | 0.8333±0.0000 | 0.7917±0.0000 |

Table 1: HM Random Forest baseline results of CV using base features, taking best model of grid using accuracy. Predictions from admission.

| Day | Corrects     | Totals | Accuracy      | AUC           | Sensitivity   | Specificity   | F1            |
|-----|--------------|--------|---------------|---------------|---------------|---------------|---------------|
| 1   | 184.8±0.8367 | 194    | 0.9526±0.0043 | 0.8943±0.0090 | 0.8061±0.0166 | 0.9826±0.0028 | 0.9121±0.0082 |
| 2   | 183.2±0.4472 | 194    | 0.9443±0.0023 | 0.8870±0.0062 | 0.8000±0.0166 | 0.9739±0.0052 | 0.8985±0.0034 |
| 3   | 177.6±0.5477 | 187    | 0.9497±0.0029 | 0.8703±0.0091 | 0.7533±0.0183 | 0.9873±0.0000 | 0.8992±0.0067 |
| 4   | 170.2±1.4832 | 180    | 0.9456±0.0082 | 0.8617±0.0259 | 0.7379±0.0523 | 0.9854±0.0030 | 0.8905±0.0194 |
| 5   | 147.4±1.3416 | 160    | 0.9213±0.0084 | 0.8050±0.0256 | 0.6296±0.0524 | 0.9805±0.0041 | 0.8413±0.0210 |
| 6   | 129.0±0.7071 | 142    | 0.9085±0.0050 | 0.7903±0.0096 | 0.6080±0.0179 | 0.9726±0.0038 | 0.8232±0.0097 |
| 7   | 103.8±0.8367 | 117    | 0.8872±0.0072 | 0.7656±0.0156 | 0.5652±0.0307 | 0.9660±0.0048 | 0.7976±0.0146 |
| 8   | 88.6±1.5166  | 100    | 0.8860±0.0152 | 0.7524±0.0388 | 0.5368±0.0781 | 0.9679±0.0068 | 0.7858±0.0363 |
| 9   | 67.8±0.4472  | 79     | 0.8582±0.0057 | 0.7293±0.0118 | 0.5125±0.0280 | 0.9460±0.0087 | 0.7540±0.0100 |
| 10  | 53.2±0.4472  | 62     | 0.8581±0.0072 | 0.7576±0.0178 | 0.5846±0.0421 | 0.9306±0.0112 | 0.7724±0.0138 |
| 11  | 47.4±0.5477  | 54     | 0.8778±0.0101 | 0.7726±0.0065 | 0.5833±0.0000 | 0.9619±0.0130 | 0.8022±0.0125 |
| 12  | 42.0±0.7071  | 50     | 0.8400±0.0141 | 0.7237±0.0295 | 0.5000±0.0589 | 0.9474±0.0000 | 0.7493±0.0288 |
| 13  | 37.2±0.8367  | 44     | 0.8455±0.0190 | 0.6722±0.0296 | 0.4000±0.0559 | 0.9444±0.0196 | 0.6968±0.0324 |
| 14  | 29.8±0.4472  | 37     | 0.8054±0.0121 | 0.6767±0.0301 | 0.4500±0.0685 | 0.9034±0.0154 | 0.6886±0.0272 |
| 15  | 24.2±0.4472  | 31     | 0.7806±0.0144 | 0.6054±0.0093 | 0.2857±0.0000 | 0.9250±0.0186 | 0.6190±0.0130 |
| 16  | 21.0±0.7071  | 28     | 0.7500±0.0253 | 0.5857±0.0361 | 0.2571±0.0639 | 0.9143±0.0213 | 0.5920±0.0461 |
| 17  | 17.6±0.5477  | 23     | 0.7652±0.0238 | 0.5716±0.0161 | 0.1667±0.0000 | 0.9765±0.0322 | 0.5657±0.0179 |
| 18  | 12.4±0.5477  | 16     | 0.7750±0.0342 | 0.5500±0.0685 | 0.1000±0.1369 | 1.0000±0.0000 | 0.5149±0.1182 |
| 19  | 7.2±0.4472   | 11     | 0.6545±0.0407 | 0.5679±0.0319 | 0.2500±0.0000 | 0.8857±0.0639 | 0.5557±0.0313 |
| 20  | 6.2±0.4472   | 10     | 0.6200±0.0447 | 0.5583±0.0373 | 0.2500±0.0000 | 0.8667±0.0745 | 0.5390±0.0341 |

Table 2: HM Random Forest baseline results of CV using base features, taking best model of grid using accuracy. Predictions from outcome.

| Day | Corrects     | Totals | Accuracy      | AUC           | Sensitivity   | Specificity   | F1            |
|-----|--------------|--------|---------------|---------------|---------------|---------------|---------------|
| 1   | 169.2±1.0954 | 194    | 0.8722±0.0056 | 0.6917±0.0207 | 0.4182±0.0449 | 0.9652±0.0056 | 0.7259±0.0191 |
| 2   | 170.8±0.8367 | 194    | 0.8804±0.0043 | 0.6943±0.0090 | 0.4121±0.0166 | 0.9764±0.0028 | 0.7354±0.0104 |
| 3   | 168.4±1.6733 | 187    | 0.9005±0.0089 | 0.7385±0.0127 | 0.5000±0.0236 | 0.9771±0.0097 | 0.7802±0.0165 |
| 4   | 168.2±1.3038 | 180    | 0.9344±0.0072 | 0.8161±0.0166 | 0.6414±0.0308 | 0.9907±0.0036 | 0.8605±0.0162 |
| 5   | 150.2±0.8367 | 160    | 0.9387±0.0052 | 0.8333±0.0155 | 0.6741±0.0310 | 0.9925±0.0000 | 0.8759±0.0125 |
| 6   | 133.4±0.8944 | 142    | 0.9394±0.0063 | 0.8532±0.0143 | 0.7200±0.0283 | 0.9863±0.0047 | 0.8856±0.0125 |
| 7   | 109.2±0.8367 | 117    | 0.9333±0.0072 | 0.8633±0.0182 | 0.7478±0.0364 | 0.9787±0.0000 | 0.8871±0.0139 |
| 8   | 92.2±1.0954  | 100    | 0.9220±0.0110 | 0.8431±0.0241 | 0.7158±0.0471 | 0.9704±0.0068 | 0.8647±0.0202 |
| 9   | 71.6±0.5477  | 79     | 0.9063±0.0069 | 0.8387±0.0171 | 0.7250±0.0342 | 0.9524±0.0000 | 0.8499±0.0132 |
| 10  | 56.2±0.8367  | 62     | 0.9065±0.0135 | 0.8391±0.0233 | 0.7231±0.0421 | 0.9551±0.0091 | 0.8528±0.0217 |
| 11  | 49.0±0.0000  | 54     | 0.9074±0.0000 | 0.8512±0.0000 | 0.7500±0.0000 | 0.9524±0.0000 | 0.8619±0.0000 |
| 12  | 44.2±0.8367  | 50     | 0.8840±0.0167 | 0.8268±0.0350 | 0.7167±0.0745 | 0.9368±0.0144 | 0.8356±0.0285 |
| 13  | 37.8±0.4472  | 44     | 0.8591±0.0102 | 0.7583±0.0280 | 0.6000±0.0559 | 0.9167±0.0000 | 0.7604±0.0233 |
| 14  | 31.4±0.5477  | 37     | 0.8486±0.0148 | 0.7948±0.0319 | 0.7000±0.0685 | 0.8897±0.0154 | 0.7839±0.0243 |
| 15  | 26.0±0.0000  | 31     | 0.8387±0.0000 | 0.7440±0.0000 | 0.5714±0.0000 | 0.9167±0.0000 | 0.7567±0.0000 |
| 16  | 24.0±0.0000  | 28     | 0.8571±0.0000 | 0.7619±0.0000 | 0.5714±0.0000 | 0.9524±0.0000 | 0.7879±0.0000 |
| 17  | 18.8±0.4472  | 23     | 0.8174±0.0194 | 0.7147±0.0132 | 0.5000±0.0000 | 0.9294±0.0263 | 0.7358±0.0193 |
| 18  | 13.8±0.4472  | 16     | 0.8625±0.0280 | 0.8250±0.0186 | 0.7500±0.0000 | 0.9000±0.0373 | 0.8203±0.0292 |
| 19  | 9.0±0.0000   | 11     | 0.8182±0.0000 | 0.8036±0.0000 | 0.7500±0.0000 | 0.8571±0.0000 | 0.8036±0.0000 |
| 20  | 8.0±0.0000   | 10     | 0.8000±0.0000 | 0.7917±0.0000 | 0.7500±0.0000 | 0.8333±0.0000 | 0.7917±0.0000 |

Table 3: HM Random Forest baseline results of CV using base features, taking best model of grid using F1. Predictions from admission.

| Day | Corrects     | Totals | Accuracy      | AUC           | Sensitivity   | Specificity   | F1            |
|-----|--------------|--------|---------------|---------------|---------------|---------------|---------------|
| 1   | 185.2±0.4472 | 194    | 0.9546±0.0023 | 0.9004±0.0014 | 0.8182±0.0000 | 0.9826±0.0028 | 0.9164±0.0038 |
| 2   | 183.0±1.0000 | 194    | 0.9433±0.0052 | 0.8863±0.0095 | 0.8000±0.0166 | 0.9727±0.0034 | 0.8968±0.0094 |
| 3   | 178.0±0.7071 | 187    | 0.9519±0.0038 | 0.8824±0.0175 | 0.7800±0.0380 | 0.9847±0.0035 | 0.9050±0.0095 |
| 4   | 170.6±1.5166 | 180    | 0.9478±0.0084 | 0.8658±0.0261 | 0.7448±0.0523 | 0.9868±0.0000 | 0.8950±0.0199 |
| 5   | 147.6±0.8944 | 160    | 0.9225±0.0056 | 0.8087±0.0142 | 0.6370±0.0310 | 0.9805±0.0067 | 0.8447±0.0117 |
| 6   | 128.2±0.4472 | 142    | 0.9028±0.0031 | 0.7775±0.0096 | 0.5840±0.0219 | 0.9709±0.0047 | 0.8108±0.0072 |
| 7   | 103.8±0.4472 | 117    | 0.8872±0.0038 | 0.7656±0.0024 | 0.5652±0.0000 | 0.9660±0.0048 | 0.7978±0.0050 |
| 8   | 89.0±2.0000  | 100    | 0.8900±0.0200 | 0.7589±0.0486 | 0.5474±0.0956 | 0.9704±0.0068 | 0.7927±0.0464 |
| 9   | 68.6±0.8944  | 79     | 0.8684±0.0113 | 0.7449±0.0180 | 0.5375±0.0342 | 0.9524±0.0112 | 0.7717±0.0193 |
| 10  | 53.2±0.4472  | 62     | 0.8581±0.0072 | 0.7746±0.0172 | 0.6308±0.0344 | 0.9184±0.0000 | 0.7807±0.0138 |
| 11  | 47.2±0.4472  | 54     | 0.8741±0.0083 | 0.7583±0.0191 | 0.5500±0.0456 | 0.9667±0.0130 | 0.7910±0.0162 |
| 12  | 42.4±0.5477  | 50     | 0.8480±0.0110 | 0.7289±0.0254 | 0.5000±0.0589 | 0.9579±0.0144 | 0.7581±0.0232 |
| 13  | 36.8±1.3038  | 44     | 0.8364±0.0296 | 0.6667±0.0393 | 0.4000±0.0559 | 0.9333±0.0248 | 0.6878±0.0495 |
| 14  | 29.6±0.5477  | 37     | 0.8000±0.0148 | 0.6642±0.0319 | 0.4250±0.0685 | 0.9034±0.0154 | 0.6767±0.0299 |
| 15  | 24.2±0.4472  | 31     | 0.7806±0.0144 | 0.6054±0.0093 | 0.2857±0.0000 | 0.9250±0.0186 | 0.6190±0.0130 |
| 16  | 20.8±0.4472  | 28     | 0.7429±0.0160 | 0.5810±0.0319 | 0.2571±0.0639 | 0.9048±0.0000 | 0.5858±0.0407 |
| 17  | 17.8±0.4472  | 23     | 0.7739±0.0194 | 0.5775±0.0132 | 0.1667±0.0000 | 0.9882±0.0263 | 0.5722±0.0146 |
| 18  | 12.6±0.5477  | 16     | 0.7875±0.0342 | 0.5750±0.0685 | 0.1500±0.1369 | 1.0000±0.0000 | 0.5581±0.1182 |
| 19  | 7.0±0.0000   | 11     | 0.6364±0.0000 | 0.5536±0.0000 | 0.2500±0.0000 | 0.8571±0.0000 | 0.5417±0.0000 |
| 20  | 5.8±0.8367   | 10     | 0.5800±0.0837 | 0.5250±0.0697 | 0.2500±0.0000 | 0.8000±0.1394 | 0.5097±0.0623 |

Table 4: HM Random Forest baseline results of CV using base features, taking best model of grid using F1. Predictions from outcome.

| Day | Corrects     | Totals | Accuracy      | AUC           | Sensitivity   | Specificity   | F1            |
|-----|--------------|--------|---------------|---------------|---------------|---------------|---------------|
| 1   | 170.0±1.4142 | 194    | 0.8763±0.0073 | 0.6918±0.0109 | 0.4121±0.0166 | 0.9714±0.0056 | 0.7301±0.0143 |
| 2   | 170.8±0.4472 | 194    | 0.8804±0.0023 | 0.6846±0.0109 | 0.3879±0.0254 | 0.9814±0.0044 | 0.7279±0.0099 |
| 3   | 167.8±0.8367 | 187    | 0.8973±0.0045 | 0.7097±0.0027 | 0.4333±0.0000 | 0.9860±0.0053 | 0.7585±0.0067 |
| 4   | 163.8±0.8367 | 180    | 0.9100±0.0046 | 0.7597±0.0075 | 0.5379±0.0189 | 0.9815±0.0073 | 0.8032±0.0074 |
| 5   | 146.8±0.8367 | 160    | 0.9175±0.0052 | 0.7792±0.0093 | 0.5704±0.0203 | 0.9880±0.0067 | 0.8261±0.0097 |
| 6   | 128.4±1.1402 | 142    | 0.9042±0.0080 | 0.7752±0.0221 | 0.5760±0.0456 | 0.9744±0.0060 | 0.8111±0.0188 |
| 7   | 106.2±0.8367 | 117    | 0.9077±0.0072 | 0.7981±0.0182 | 0.6174±0.0364 | 0.9787±0.0000 | 0.8343±0.0157 |
| 8   | 91.8±0.4472  | 100    | 0.9180±0.0045 | 0.8245±0.0118 | 0.6737±0.0235 | 0.9753±0.0000 | 0.8539±0.0096 |
| 9   | 73.4±0.8944  | 79     | 0.9291±0.0113 | 0.8810±0.0170 | 0.8000±0.0280 | 0.9619±0.0087 | 0.8882±0.0177 |
| 10  | 56.8±1.0954  | 62     | 0.9161±0.0177 | 0.8622±0.0309 | 0.7692±0.0544 | 0.9551±0.0091 | 0.8703±0.0282 |
| 11  | 50.2±0.4472  | 54     | 0.9296±0.0083 | 0.8714±0.0186 | 0.7667±0.0373 | 0.9762±0.0000 | 0.8921±0.0140 |
| 12  | 46.4±1.1402  | 50     | 0.9280±0.0228 | 0.8785±0.0475 | 0.7833±0.0950 | 0.9737±0.0000 | 0.8953±0.0363 |
| 13  | 41.0±1.0000  | 44     | 0.9318±0.0227 | 0.8611±0.0625 | 0.7500±0.1250 | 0.9722±0.0000 | 0.8774±0.0468 |
| 14  | 33.4±0.5477  | 37     | 0.9027±0.0148 | 0.8655±0.0342 | 0.8000±0.0685 | 0.9310±0.0000 | 0.8585±0.0246 |
| 15  | 26.4±0.5477  | 31     | 0.8516±0.0177 | 0.7726±0.0391 | 0.6286±0.0782 | 0.9167±0.0000 | 0.7802±0.0322 |
| 16  | 24.8±0.4472  | 28     | 0.8857±0.0160 | 0.8476±0.0319 | 0.7714±0.0782 | 0.9238±0.0261 | 0.8472±0.0221 |
| 17  | 20.0±0.0000  | 23     | 0.8696±0.0000 | 0.8039±0.0000 | 0.6667±0.0000 | 0.9412±0.0000 | 0.8208±0.0000 |
| 18  | 14.0±0.0000  | 16     | 0.8750±0.0000 | 0.8333±0.0000 | 0.7500±0.0000 | 0.9167±0.0000 | 0.8333±0.0000 |
| 19  | 9.0±0.0000   | 11     | 0.8182±0.0000 | 0.8036±0.0000 | 0.7500±0.0000 | 0.8571±0.0000 | 0.8036±0.0000 |
| 20  | 8.0±0.0000   | 10     | 0.8000±0.0000 | 0.7917±0.0000 | 0.7500±0.0000 | 0.8333±0.0000 | 0.7917±0.0000 |

Table 5: HM Random Forest with imputation, results of CV, taking best model of grid using accuracy. Predictions from admission.

| Day | Corrects     | Totals | Accuracy      | AUC           | Sensitivity   | Specificity   | F1            |
|-----|--------------|--------|---------------|---------------|---------------|---------------|---------------|
| 1   | 183.8±1.4832 | 194    | 0.9474±0.0076 | 0.8768±0.0182 | 0.7697±0.0346 | 0.9839±0.0034 | 0.9007±0.0153 |
| 2   | 181.6±0.5477 | 194    | 0.9361±0.0028 | 0.8483±0.0083 | 0.7152±0.0166 | 0.9814±0.0000 | 0.8771±0.0064 |
| 3   | 173.6±0.8944 | 187    | 0.9283±0.0048 | 0.8198±0.0138 | 0.6600±0.0279 | 0.9796±0.0028 | 0.8526±0.0112 |
| 4   | 167.4±0.5477 | 180    | 0.9300±0.0030 | 0.8218±0.0133 | 0.6621±0.0289 | 0.9815±0.0030 | 0.8559±0.0086 |
| 5   | 146.8±0.8367 | 160    | 0.9175±0.0052 | 0.7910±0.0149 | 0.6000±0.0310 | 0.9820±0.0041 | 0.8311±0.0127 |
| 6   | 127.4±0.8944 | 142    | 0.8972±0.0063 | 0.7520±0.0092 | 0.5280±0.0179 | 0.9761±0.0072 | 0.7919±0.0108 |
| 7   | 103.6±1.1402 | 117    | 0.8855±0.0097 | 0.7415±0.0248 | 0.5043±0.0496 | 0.9787±0.0000 | 0.7825±0.0242 |
| 8   | 89.2±0.8367  | 100    | 0.8920±0.0084 | 0.7561±0.0220 | 0.5368±0.0440 | 0.9753±0.0000 | 0.7946±0.0205 |
| 9   | 70.4±0.5477  | 79     | 0.8911±0.0069 | 0.7825±0.0160 | 0.6000±0.0342 | 0.9651±0.0071 | 0.8121±0.0138 |
| 10  | 54.0±1.0000  | 62     | 0.8710±0.0161 | 0.7601±0.0251 | 0.5692±0.0421 | 0.9510±0.0112 | 0.7850±0.0269 |
| 11  | 48.0±0.7071  | 54     | 0.8889±0.0131 | 0.7917±0.0227 | 0.6167±0.0456 | 0.9667±0.0130 | 0.8212±0.0216 |
| 12  | 43.4±1.3416  | 50     | 0.8680±0.0268 | 0.7820±0.0418 | 0.6167±0.0745 | 0.9474±0.0186 | 0.8033±0.0425 |
| 13  | 39.0±0.0000  | 44     | 0.8864±0.0000 | 0.7847±0.0000 | 0.6250±0.0000 | 0.9444±0.0000 | 0.7991±0.0000 |
| 14  | 30.2±0.4472  | 37     | 0.8162±0.0121 | 0.7017±0.0077 | 0.5000±0.0000 | 0.9034±0.0154 | 0.7130±0.0127 |
| 15  | 24.6±0.5477  | 31     | 0.7935±0.0177 | 0.6339±0.0363 | 0.3429±0.0782 | 0.9250±0.0186 | 0.6497±0.0386 |
| 16  | 21.8±0.4472  | 28     | 0.7786±0.0160 | 0.6143±0.0106 | 0.2857±0.0000 | 0.9429±0.0213 | 0.6286±0.0137 |
| 17  | 18.0±0.0000  | 23     | 0.7826±0.0000 | 0.5833±0.0000 | 0.1667±0.0000 | 1.0000±0.0000 | 0.5788±0.0000 |
| 18  | 12.8±0.4472  | 16     | 0.8000±0.0280 | 0.6167±0.0186 | 0.2500±0.0000 | 0.9833±0.0373 | 0.6335±0.0245 |
| 19  | 7.0±0.0000   | 11     | 0.6364±0.0000 | 0.5536±0.0000 | 0.2500±0.0000 | 0.8571±0.0000 | 0.5417±0.0000 |
| 20  | 6.4±0.5477   | 10     | 0.6400±0.0548 | 0.5750±0.0456 | 0.2500±0.0000 | 0.9000±0.0913 | 0.5543±0.0417 |

Table 6: HM Random Forest with imputation, results of CV, taking best model of grid using accuracy. Predictions from outcome.

| Day | Corrects     | Totals | Accuracy      | AUC           | Sensitivity   | Specificity   | F1            |
|-----|--------------|--------|---------------|---------------|---------------|---------------|---------------|
| 1   | 170.6±1.5166 | 194    | 0.8794±0.0078 | 0.6936±0.0153 | 0.4121±0.0271 | 0.9752±0.0044 | 0.7340±0.0184 |
| 2   | 170.8±0.8367 | 194    | 0.8804±0.0043 | 0.6919±0.0087 | 0.4061±0.0166 | 0.9776±0.0034 | 0.7336±0.0101 |
| 3   | 167.6±1.8166 | 187    | 0.8963±0.0097 | 0.7090±0.0209 | 0.4333±0.0408 | 0.9847±0.0085 | 0.7566±0.0233 |
| 4   | 164.0±1.0000 | 180    | 0.9111±0.0056 | 0.7576±0.0096 | 0.5310±0.0189 | 0.9841±0.0059 | 0.8035±0.0110 |
| 5   | 146.0±1.2247 | 160    | 0.9125±0.0077 | 0.7703±0.0214 | 0.5556±0.0454 | 0.9850±0.0075 | 0.8152±0.0192 |
| 6   | 129.0±1.5811 | 142    | 0.9085±0.0111 | 0.7809±0.0351 | 0.5840±0.0727 | 0.9778±0.0047 | 0.8181±0.0286 |
| 7   | 106.4±0.5477 | 117    | 0.9094±0.0047 | 0.7958±0.0137 | 0.6087±0.0307 | 0.9830±0.0058 | 0.8354±0.0104 |
| 8   | 91.8±0.4472  | 100    | 0.9180±0.0045 | 0.8245±0.0185 | 0.6737±0.0440 | 0.9753±0.0087 | 0.8538±0.0107 |
| 9   | 72.8±1.3038  | 79     | 0.9215±0.0165 | 0.8622±0.0280 | 0.7625±0.0523 | 0.9619±0.0142 | 0.8743±0.0267 |
| 10  | 56.4±0.8944  | 62     | 0.9097±0.0144 | 0.8524±0.0211 | 0.7538±0.0344 | 0.9510±0.0112 | 0.8606±0.0220 |
| 11  | 50.2±0.4472  | 54     | 0.9296±0.0083 | 0.8774±0.0200 | 0.7833±0.0456 | 0.9714±0.0106 | 0.8935±0.0136 |
| 12  | 45.8±1.0954  | 50     | 0.9160±0.0219 | 0.8592±0.0343 | 0.7500±0.0589 | 0.9684±0.0118 | 0.8782±0.0327 |
| 13  | 40.8±0.4472  | 44     | 0.9273±0.0102 | 0.8583±0.0395 | 0.7500±0.0884 | 0.9667±0.0124 | 0.8718±0.0238 |
| 14  | 33.4±0.8944  | 37     | 0.9027±0.0242 | 0.8655±0.0559 | 0.8000±0.1118 | 0.9310±0.0000 | 0.8576±0.0420 |
| 15  | 26.8±0.4472  | 31     | 0.8645±0.0144 | 0.8012±0.0319 | 0.6857±0.0639 | 0.9167±0.0000 | 0.8037±0.0263 |
| 16  | 24.4±0.8944  | 28     | 0.8714±0.0319 | 0.8286±0.0593 | 0.7429±0.1195 | 0.9143±0.0213 | 0.8271±0.0487 |
| 17  | 20.4±0.5477  | 23     | 0.8870±0.0238 | 0.8373±0.0456 | 0.7333±0.0913 | 0.9412±0.0000 | 0.8474±0.0364 |
| 18  | 14.0±0.0000  | 16     | 0.8750±0.0000 | 0.8333±0.0000 | 0.7500±0.0000 | 0.9167±0.0000 | 0.8333±0.0000 |
| 19  | 9.0±0.0000   | 11     | 0.8182±0.0000 | 0.8036±0.0000 | 0.7500±0.0000 | 0.8571±0.0000 | 0.8036±0.0000 |
| 20  | 8.0±0.0000   | 10     | 0.8000±0.0000 | 0.7917±0.0000 | 0.7500±0.0000 | 0.8333±0.0000 | 0.7917±0.0000 |

Table 7: HM Random Forest with imputation, results of CV, taking best model of grid using F1. Predictions from admission.

| Day | Corrects     | Totals | Accuracy      | AUC           | Sensitivity   | Specificity   | F1            |
|-----|--------------|--------|---------------|---------------|---------------|---------------|---------------|
| 1   | 183.0±1.2247 | 194    | 0.9433±0.0063 | 0.8671±0.0138 | 0.7515±0.0254 | 0.9826±0.0028 | 0.8924±0.0126 |
| 2   | 181.4±1.5166 | 194    | 0.9351±0.0078 | 0.8428±0.0203 | 0.7030±0.0395 | 0.9826±0.0028 | 0.8739±0.0169 |
| 3   | 174.2±1.3038 | 187    | 0.9316±0.0070 | 0.8244±0.0205 | 0.6667±0.0408 | 0.9822±0.0028 | 0.8586±0.0170 |
| 4   | 167.8±1.3038 | 180    | 0.9322±0.0072 | 0.8259±0.0266 | 0.6690±0.0577 | 0.9828±0.0076 | 0.8602±0.0184 |
| 5   | 146.8±1.6432 | 160    | 0.9175±0.0103 | 0.7910±0.0247 | 0.6000±0.0483 | 0.9820±0.0067 | 0.8309±0.0231 |
| 6   | 127.6±2.0736 | 142    | 0.8986±0.0146 | 0.7560±0.0280 | 0.5360±0.0537 | 0.9761±0.0127 | 0.7953±0.0307 |
| 7   | 104.0±1.2247 | 117    | 0.8889±0.0105 | 0.7502±0.0221 | 0.5217±0.0435 | 0.9787±0.0075 | 0.7910±0.0223 |
| 8   | 89.0±1.4142  | 100    | 0.8900±0.0141 | 0.7589±0.0255 | 0.5474±0.0471 | 0.9704±0.0110 | 0.7942±0.0276 |
| 9   | 70.4±0.8944  | 79     | 0.8911±0.0113 | 0.7872±0.0140 | 0.6125±0.0280 | 0.9619±0.0142 | 0.8145±0.0170 |
| 10  | 54.2±0.8367  | 62     | 0.8742±0.0135 | 0.7678±0.0227 | 0.5846±0.0421 | 0.9510±0.0112 | 0.7917±0.0229 |
| 11  | 48.0±0.7071  | 54     | 0.8889±0.0131 | 0.7857±0.0323 | 0.6000±0.0697 | 0.9714±0.0106 | 0.8179±0.0275 |
| 12  | 43.0±1.2247  | 50     | 0.8600±0.0245 | 0.7596±0.0347 | 0.5667±0.0697 | 0.9526±0.0288 | 0.7857±0.0358 |
| 13  | 38.2±0.4472  | 44     | 0.8682±0.0102 | 0.7542±0.0297 | 0.5750±0.0685 | 0.9333±0.0152 | 0.7662±0.0224 |
| 14  | 30.4±0.5477  | 37     | 0.8216±0.0148 | 0.7052±0.0094 | 0.5000±0.0000 | 0.9103±0.0189 | 0.7187±0.0155 |
| 15  | 23.8±1.7889  | 31     | 0.7677±0.0577 | 0.6274±0.0637 | 0.3714±0.0782 | 0.8833±0.0543 | 0.6394±0.0742 |
| 16  | 21.6±1.1402  | 28     | 0.7714±0.0407 | 0.6095±0.0271 | 0.2857±0.0000 | 0.9333±0.0543 | 0.6237±0.0353 |
| 17  | 17.8±0.4472  | 23     | 0.7739±0.0194 | 0.5775±0.0132 | 0.1667±0.0000 | 0.9882±0.0263 | 0.5722±0.0146 |
| 18  | 12.8±0.4472  | 16     | 0.8000±0.0280 | 0.6167±0.0186 | 0.2500±0.0000 | 0.9833±0.0373 | 0.6335±0.0245 |
| 19  | 7.6±0.5477   | 11     | 0.6909±0.0498 | 0.5964±0.0391 | 0.2500±0.0000 | 0.9429±0.0782 | 0.5837±0.0384 |
| 20  | 6.6±0.5477   | 10     | 0.6600±0.0548 | 0.5917±0.0456 | 0.2500±0.0000 | 0.9333±0.0913 | 0.5695±0.0417 |

Table 8: HM Random Forest with imputation, results of CV, taking best model of grid using F1. Predictions from outcome.

| Day | Corrects     | Totals | Accuracy      | AUC           | Sensitivity   | Specificity   | F1            |
|-----|--------------|--------|---------------|---------------|---------------|---------------|---------------|
| 1   | 169.0±2.2361 | 194    | 0.8711±0.0115 | 0.6766±0.0214 | 0.3818±0.0407 | 0.9714±0.0104 | 0.7138±0.0253 |
| 2   | 170.8±1.6432 | 194    | 0.8804±0.0085 | 0.6798±0.0192 | 0.3758±0.0407 | 0.9839±0.0094 | 0.7238±0.0216 |
| 3   | 166.8±1.6432 | 187    | 0.8920±0.0088 | 0.7092±0.0142 | 0.4400±0.0279 | 0.9783±0.0097 | 0.7524±0.0174 |
| 4   | 164.0±0.7071 | 180    | 0.9111±0.0039 | 0.7576±0.0080 | 0.5310±0.0189 | 0.9841±0.0059 | 0.8035±0.0073 |
| 5   | 145.6±1.3416 | 160    | 0.9100±0.0084 | 0.7629±0.0111 | 0.5407±0.0203 | 0.9850±0.0092 | 0.8089±0.0150 |
| 6   | 127.8±0.8367 | 142    | 0.9000±0.0059 | 0.7600±0.0205 | 0.5440±0.0456 | 0.9761±0.0072 | 0.7988±0.0165 |
| 7   | 105.8±0.8367 | 117    | 0.9043±0.0072 | 0.7894±0.0182 | 0.6000±0.0364 | 0.9787±0.0000 | 0.8268±0.0158 |
| 8   | 90.6±0.8944  | 100    | 0.9060±0.0089 | 0.8010±0.0250 | 0.6316±0.0526 | 0.9704±0.0068 | 0.8306±0.0198 |
| 9   | 72.2±1.0954  | 79     | 0.9139±0.0139 | 0.8621±0.0197 | 0.7750±0.0342 | 0.9492±0.0133 | 0.8656±0.0208 |
| 10  | 56.2±1.0954  | 62     | 0.9065±0.0177 | 0.8447±0.0354 | 0.7385±0.0688 | 0.9510±0.0112 | 0.8543±0.0291 |
| 11  | 49.6±1.1402  | 54     | 0.9185±0.0211 | 0.8643±0.0375 | 0.7667±0.0697 | 0.9619±0.0130 | 0.8773±0.0335 |
| 12  | 45.4±1.5166  | 50     | 0.9080±0.0303 | 0.8539±0.0541 | 0.7500±0.1021 | 0.9579±0.0144 | 0.8674±0.0482 |
| 13  | 40.6±1.1402  | 44     | 0.9227±0.0259 | 0.8653±0.0553 | 0.7750±0.1046 | 0.9556±0.0152 | 0.8680±0.0472 |
| 14  | 33.2±0.8367  | 37     | 0.8973±0.0226 | 0.8440±0.0449 | 0.7500±0.0884 | 0.9379±0.0154 | 0.8464±0.0370 |
| 15  | 26.6±0.8944  | 31     | 0.8581±0.0289 | 0.7768±0.0454 | 0.6286±0.0782 | 0.9250±0.0186 | 0.7879±0.0449 |
| 16  | 24.2±0.8367  | 28     | 0.8643±0.0299 | 0.8143±0.0516 | 0.7143±0.1010 | 0.9143±0.0213 | 0.8163±0.0444 |
| 17  | 20.2±0.4472  | 23     | 0.8783±0.0194 | 0.8206±0.0373 | 0.7000±0.0745 | 0.9412±0.0000 | 0.8341±0.0297 |
| 18  | 14.2±0.4472  | 16     | 0.8875±0.0280 | 0.8583±0.0559 | 0.8000±0.1118 | 0.9167±0.0000 | 0.8512±0.0400 |
| 19  | 9.2±0.4472   | 11     | 0.8364±0.0407 | 0.8286±0.0559 | 0.8000±0.1118 | 0.8571±0.0000 | 0.8241±0.0458 |
| 20  | 8.2±0.4472   | 10     | 0.8200±0.0447 | 0.8167±0.0559 | 0.8000±0.1118 | 0.8333±0.0000 | 0.8131±0.0480 |

Table 9: HM Random Forest with imputation, with missing flags, results of CV, taking best model of grid using accuracy. Predictions from admission.

| Day | Corrects     | Totals | Accuracy      | AUC           | Sensitivity   | Specificity   | F1            |
|-----|--------------|--------|---------------|---------------|---------------|---------------|---------------|
| 1   | 183.4±1.5166 | 194    | 0.9454±0.0078 | 0.8731±0.0203 | 0.7636±0.0395 | 0.9826±0.0028 | 0.8967±0.0164 |
| 2   | 182.4±2.1909 | 194    | 0.9402±0.0113 | 0.8580±0.0299 | 0.7333±0.0583 | 0.9826±0.0028 | 0.8852±0.0247 |
| 3   | 174.0±1.2247 | 187    | 0.9305±0.0065 | 0.8238±0.0220 | 0.6667±0.0471 | 0.9809±0.0064 | 0.8568±0.0157 |
| 4   | 166.0±1.5811 | 180    | 0.9222±0.0088 | 0.8060±0.0166 | 0.6345±0.0308 | 0.9775±0.0076 | 0.8396±0.0173 |
| 5   | 145.8±1.9235 | 160    | 0.9113±0.0120 | 0.7813±0.0311 | 0.5852±0.0609 | 0.9774±0.0053 | 0.8185±0.0283 |
| 6   | 126.0±1.0000 | 142    | 0.8873±0.0070 | 0.7335±0.0168 | 0.4960±0.0358 | 0.9709±0.0076 | 0.7708±0.0162 |
| 7   | 103.0±1.2247 | 117    | 0.8803±0.0105 | 0.7318±0.0201 | 0.4870±0.0364 | 0.9766±0.0048 | 0.7721±0.0221 |
| 8   | 88.6±2.0736  | 100    | 0.8860±0.0207 | 0.7483±0.0474 | 0.5263±0.0912 | 0.9704±0.0068 | 0.7833±0.0447 |
| 9   | 69.6±1.3416  | 79     | 0.8810±0.0170 | 0.7762±0.0334 | 0.6000±0.0713 | 0.9524±0.0194 | 0.7988±0.0299 |
| 10  | 53.8±0.4472  | 62     | 0.8677±0.0072 | 0.7581±0.0178 | 0.5692±0.0421 | 0.9469±0.0112 | 0.7809±0.0138 |
| 11  | 47.0±0.7071  | 54     | 0.8704±0.0131 | 0.7500±0.0227 | 0.5333±0.0456 | 0.9667±0.0130 | 0.7833±0.0228 |
| 12  | 42.6±0.5477  | 50     | 0.8520±0.0110 | 0.7487±0.0305 | 0.5500±0.0745 | 0.9474±0.0186 | 0.7728±0.0233 |
| 13  | 37.6±1.8166  | 44     | 0.8545±0.0413 | 0.7167±0.0732 | 0.5000±0.1250 | 0.9333±0.0248 | 0.7337±0.0784 |
| 14  | 30.4±0.8944  | 37     | 0.8216±0.0242 | 0.6961±0.0346 | 0.4750±0.0559 | 0.9172±0.0189 | 0.7124±0.0383 |
| 15  | 24.6±0.5477  | 31     | 0.7935±0.0177 | 0.6137±0.0114 | 0.2857±0.0000 | 0.9417±0.0228 | 0.6307±0.0159 |
| 16  | 21.8±0.8367  | 28     | 0.7786±0.0299 | 0.5952±0.0445 | 0.2286±0.0782 | 0.9619±0.0213 | 0.6024±0.0616 |
| 17  | 17.4±0.5477  | 23     | 0.7565±0.0238 | 0.5657±0.0161 | 0.1667±0.0000 | 0.9647±0.0322 | 0.5591±0.0179 |
| 18  | 12.4±0.5477  | 16     | 0.7750±0.0342 | 0.6000±0.0228 | 0.2500±0.0000 | 0.9500±0.0456 | 0.6116±0.0300 |
| 19  | 7.2±0.8367   | 11     | 0.6545±0.0761 | 0.5893±0.0866 | 0.3500±0.1369 | 0.8286±0.0639 | 0.5862±0.0947 |
| 20  | 6.6±0.5477   | 10     | 0.6600±0.0548 | 0.6000±0.0559 | 0.3000±0.1118 | 0.9000±0.0913 | 0.5836±0.0617 |

Table 10: HM Random Forest with imputation, with missing flags, results of CV, taking best model of grid using accuracy. Predictions from outcome.

| Day | Corrects     | Totals | Accuracy      | AUC           | Sensitivity   | Specificity   | F1            |
|-----|--------------|--------|---------------|---------------|---------------|---------------|---------------|
| 1   | 169.0±2.2361 | 194    | 0.8711±0.0115 | 0.6766±0.0214 | 0.3818±0.0407 | 0.9714±0.0104 | 0.7138±0.0253 |
| 2   | 170.8±1.6432 | 194    | 0.8804±0.0085 | 0.6798±0.0192 | 0.3758±0.0407 | 0.9839±0.0094 | 0.7238±0.0216 |
| 3   | 166.8±1.6432 | 187    | 0.8920±0.0088 | 0.7092±0.0142 | 0.4400±0.0279 | 0.9783±0.0097 | 0.7524±0.0174 |
| 4   | 164.0±0.7071 | 180    | 0.9111±0.0039 | 0.7576±0.0080 | 0.5310±0.0189 | 0.9841±0.0059 | 0.8035±0.0073 |
| 5   | 145.6±1.3416 | 160    | 0.9100±0.0084 | 0.7629±0.0111 | 0.5407±0.0203 | 0.9850±0.0092 | 0.8089±0.0150 |
| 6   | 127.8±0.8367 | 142    | 0.9000±0.0059 | 0.7600±0.0205 | 0.5440±0.0456 | 0.9761±0.0072 | 0.7988±0.0165 |
| 7   | 105.8±0.8367 | 117    | 0.9043±0.0072 | 0.7894±0.0182 | 0.6000±0.0364 | 0.9787±0.0000 | 0.8268±0.0158 |
| 8   | 90.6±0.8944  | 100    | 0.9060±0.0089 | 0.8010±0.0250 | 0.6316±0.0526 | 0.9704±0.0068 | 0.8306±0.0198 |
| 9   | 72.2±1.0954  | 79     | 0.9139±0.0139 | 0.8621±0.0197 | 0.7750±0.0342 | 0.9492±0.0133 | 0.8656±0.0208 |
| 10  | 56.2±1.0954  | 62     | 0.9065±0.0177 | 0.8447±0.0354 | 0.7385±0.0688 | 0.9510±0.0112 | 0.8543±0.0291 |
| 11  | 49.6±1.1402  | 54     | 0.9185±0.0211 | 0.8643±0.0375 | 0.7667±0.0697 | 0.9619±0.0130 | 0.8773±0.0335 |
| 12  | 45.4±1.5166  | 50     | 0.9080±0.0303 | 0.8539±0.0541 | 0.7500±0.1021 | 0.9579±0.0144 | 0.8674±0.0482 |
| 13  | 40.6±1.1402  | 44     | 0.9227±0.0259 | 0.8653±0.0553 | 0.7750±0.1046 | 0.9556±0.0152 | 0.8680±0.0472 |
| 14  | 33.2±0.8367  | 37     | 0.8973±0.0226 | 0.8440±0.0449 | 0.7500±0.0884 | 0.9379±0.0154 | 0.8464±0.0370 |
| 15  | 26.6±0.8944  | 31     | 0.8581±0.0289 | 0.7768±0.0454 | 0.6286±0.0782 | 0.9250±0.0186 | 0.7879±0.0449 |
| 16  | 24.2±0.8367  | 28     | 0.8643±0.0299 | 0.8143±0.0516 | 0.7143±0.1010 | 0.9143±0.0213 | 0.8163±0.0444 |
| 17  | 20.2±0.4472  | 23     | 0.8783±0.0194 | 0.8206±0.0373 | 0.7000±0.0745 | 0.9412±0.0000 | 0.8341±0.0297 |
| 18  | 14.2±0.4472  | 16     | 0.8875±0.0280 | 0.8583±0.0559 | 0.8000±0.1118 | 0.9167±0.0000 | 0.8512±0.0400 |
| 19  | 9.2±0.4472   | 11     | 0.8364±0.0407 | 0.8286±0.0559 | 0.8000±0.1118 | 0.8571±0.0000 | 0.8241±0.0458 |
| 20  | 8.2±0.4472   | 10     | 0.8200±0.0447 | 0.8167±0.0559 | 0.8000±0.1118 | 0.8333±0.0000 | 0.8131±0.0480 |

Table 11: HM Random Forest with imputation, with missing flags, results of CV, taking best model of grid using F1. Predictions from admission.



| Day | Corrects     | Totals | Accuracy      | AUC           | Sensitivity   | Specificity   | F1            |
|-----|--------------|--------|---------------|---------------|---------------|---------------|---------------|
| 1   | 183.4±1.5166 | 194    | 0.9454±0.0078 | 0.8731±0.0203 | 0.7636±0.0395 | 0.9826±0.0028 | 0.8967±0.0164 |
| 2   | 182.4±2.1909 | 194    | 0.9402±0.0113 | 0.8580±0.0299 | 0.7333±0.0583 | 0.9826±0.0028 | 0.8852±0.0247 |
| 3   | 174.0±1.2247 | 187    | 0.9305±0.0065 | 0.8238±0.0220 | 0.6667±0.0471 | 0.9809±0.0064 | 0.8568±0.0157 |
| 4   | 166.0±1.5811 | 180    | 0.9222±0.0088 | 0.8060±0.0166 | 0.6345±0.0308 | 0.9775±0.0076 | 0.8396±0.0173 |
| 5   | 145.8±1.9235 | 160    | 0.9113±0.0120 | 0.7813±0.0311 | 0.5852±0.0609 | 0.9774±0.0053 | 0.8185±0.0283 |
| 6   | 126.0±1.0000 | 142    | 0.8873±0.0070 | 0.7335±0.0168 | 0.4960±0.0358 | 0.9709±0.0076 | 0.7708±0.0162 |
| 7   | 103.0±1.2247 | 117    | 0.8803±0.0105 | 0.7318±0.0201 | 0.4870±0.0364 | 0.9766±0.0048 | 0.7721±0.0221 |
| 8   | 88.6±2.0736  | 100    | 0.8860±0.0207 | 0.7483±0.0474 | 0.5263±0.0912 | 0.9704±0.0068 | 0.7833±0.0447 |
| 9   | 69.6±1.3416  | 79     | 0.8810±0.0170 | 0.7762±0.0334 | 0.6000±0.0713 | 0.9524±0.0194 | 0.7988±0.0299 |
| 10  | 53.8±0.4472  | 62     | 0.8677±0.0072 | 0.7581±0.0178 | 0.5692±0.0421 | 0.9469±0.0112 | 0.7809±0.0138 |
| 11  | 47.0±0.7071  | 54     | 0.8704±0.0131 | 0.7500±0.0227 | 0.5333±0.0456 | 0.9667±0.0130 | 0.7833±0.0228 |
| 12  | 42.6±0.5477  | 50     | 0.8520±0.0110 | 0.7487±0.0305 | 0.5500±0.0745 | 0.9474±0.0186 | 0.7728±0.0233 |
| 13  | 37.6±1.8166  | 44     | 0.8545±0.0413 | 0.7167±0.0732 | 0.5000±0.1250 | 0.9333±0.0248 | 0.7337±0.0784 |
| 14  | 30.4±0.8944  | 37     | 0.8216±0.0242 | 0.6961±0.0346 | 0.4750±0.0559 | 0.9172±0.0189 | 0.7124±0.0383 |
| 15  | 24.6±0.5477  | 31     | 0.7935±0.0177 | 0.6137±0.0114 | 0.2857±0.0000 | 0.9417±0.0228 | 0.6307±0.0159 |
| 16  | 21.8±0.8367  | 28     | 0.7786±0.0299 | 0.5952±0.0445 | 0.2286±0.0782 | 0.9619±0.0213 | 0.6024±0.0616 |
| 17  | 17.4±0.5477  | 23     | 0.7565±0.0238 | 0.5657±0.0161 | 0.1667±0.0000 | 0.9647±0.0322 | 0.5591±0.0179 |
| 18  | 12.4±0.5477  | 16     | 0.7750±0.0342 | 0.6000±0.0228 | 0.2500±0.0000 | 0.9500±0.0456 | 0.6116±0.0300 |
| 19  | 7.2±0.8367   | 11     | 0.6545±0.0761 | 0.5893±0.0866 | 0.3500±0.1369 | 0.8286±0.0639 | 0.5862±0.0947 |
| 20  | 6.6±0.5477   | 10     | 0.6600±0.0548 | 0.6000±0.0559 | 0.3000±0.1118 | 0.9000±0.0913 | 0.5836±0.0617 |

Table 12: HM Random Forest with imputation, with missing flags, results of CV, taking best model of grid using F1. Predictions from outcome.

| Day | Corrects     | Totals | Accuracy      | AUC           | Sensitivity   | Specificity   | F1            |
|-----|--------------|--------|---------------|---------------|---------------|---------------|---------------|
| 1   | 171.4±1.6733 | 194    | 0.8835±0.0086 | 0.6961±0.0153 | 0.4121±0.0271 | 0.9801±0.0068 | 0.7397±0.0186 |
| 2   | 170.4±2.3022 | 194    | 0.8784±0.0119 | 0.6906±0.0168 | 0.4061±0.0271 | 0.9752±0.0108 | 0.7311±0.0230 |
| 3   | 167.8±0.4472 | 187    | 0.8973±0.0024 | 0.7258±0.0065 | 0.4733±0.0149 | 0.9783±0.0035 | 0.7689±0.0056 |
| 4   | 163.4±1.1402 | 180    | 0.9078±0.0063 | 0.7528±0.0095 | 0.5241±0.0154 | 0.9815±0.0055 | 0.7969±0.0125 |
| 5   | 145.0±1.8708 | 160    | 0.9062±0.0117 | 0.7695±0.0192 | 0.5630±0.0310 | 0.9759±0.0082 | 0.8076±0.0230 |
| 6   | 130.4±1.6733 | 142    | 0.9183±0.0118 | 0.8026±0.0363 | 0.6240±0.0780 | 0.9812±0.0111 | 0.8395±0.0277 |
| 7   | 108.6±1.5166 | 117    | 0.9282±0.0130 | 0.8568±0.0294 | 0.7391±0.0615 | 0.9745±0.0121 | 0.8787±0.0238 |
| 8   | 92.6±0.8944  | 100    | 0.9260±0.0089 | 0.8536±0.0189 | 0.7368±0.0372 | 0.9704±0.0068 | 0.8729±0.0161 |
| 9   | 73.4±0.5477  | 79     | 0.9291±0.0069 | 0.8716±0.0171 | 0.7750±0.0342 | 0.9683±0.0000 | 0.8858±0.0127 |
| 10  | 55.6±0.5477  | 62     | 0.8968±0.0088 | 0.8386±0.0211 | 0.7385±0.0421 | 0.9388±0.0000 | 0.8423±0.0161 |
| 11  | 49.2±0.8367  | 54     | 0.9111±0.0155 | 0.8595±0.0349 | 0.7667±0.0697 | 0.9524±0.0000 | 0.8677±0.0267 |
| 12  | 45.0±0.0000  | 50     | 0.9000±0.0000 | 0.8487±0.0000 | 0.7500±0.0000 | 0.9474±0.0000 | 0.8588±0.0000 |
| 13  | 39.0±0.0000  | 44     | 0.8864±0.0000 | 0.7847±0.0000 | 0.6250±0.0000 | 0.9444±0.0000 | 0.7991±0.0000 |
| 14  | 32.8±0.8367  | 37     | 0.8865±0.0226 | 0.8009±0.0330 | 0.6500±0.0559 | 0.9517±0.0189 | 0.8208±0.0342 |
| 15  | 26.2±0.4472  | 31     | 0.8452±0.0144 | 0.7583±0.0319 | 0.6000±0.0639 | 0.9167±0.0000 | 0.7684±0.0263 |
| 16  | 24.6±0.5477  | 28     | 0.8786±0.0196 | 0.8048±0.0391 | 0.6571±0.0782 | 0.9524±0.0000 | 0.8250±0.0339 |
| 17  | 19.2±0.4472  | 23     | 0.8348±0.0194 | 0.7373±0.0373 | 0.5333±0.0745 | 0.9412±0.0000 | 0.7597±0.0341 |
| 18  | 13.8±0.4472  | 16     | 0.8625±0.0280 | 0.8083±0.0559 | 0.7000±0.1118 | 0.9167±0.0000 | 0.8118±0.0481 |
| 19  | 9.0±0.0000   | 11     | 0.8182±0.0000 | 0.8036±0.0000 | 0.7500±0.0000 | 0.8571±0.0000 | 0.8036±0.0000 |
| 20  | 8.0±0.0000   | 10     | 0.8000±0.0000 | 0.7917±0.0000 | 0.7500±0.0000 | 0.8333±0.0000 | 0.7917±0.0000 |

Table 13: HM Random Forest with imputation, with missing flags, applying reference values, results of CV, taking best model of grid using accuracy. Predictions from admission.

| Day | Corrects     | Totals | Accuracy      | AUC           | Sensitivity   | Specificity   | F1            |
|-----|--------------|--------|---------------|---------------|---------------|---------------|---------------|
| 1   | 186.8±1.0954 | 194    | 0.9629±0.0056 | 0.9150±0.0166 | 0.8424±0.0332 | 0.9876±0.0000 | 0.9315±0.0115 |
| 2   | 184.0±1.4142 | 194    | 0.9485±0.0073 | 0.8822±0.0175 | 0.7818±0.0332 | 0.9826±0.0028 | 0.9034±0.0147 |
| 3   | 177.0±1.5811 | 187    | 0.9465±0.0085 | 0.8576±0.0193 | 0.7267±0.0365 | 0.9885±0.0053 | 0.8910±0.0180 |
| 4   | 166.6±1.3416 | 180    | 0.9256±0.0075 | 0.8108±0.0165 | 0.6414±0.0308 | 0.9801±0.0047 | 0.8459±0.0160 |
| 5   | 146.8±1.3038 | 160    | 0.9175±0.0081 | 0.7910±0.0238 | 0.6000±0.0483 | 0.9820±0.0041 | 0.8308±0.0201 |
| 6   | 126.2±0.4472 | 142    | 0.8887±0.0031 | 0.7438±0.0019 | 0.5200±0.0000 | 0.9675±0.0038 | 0.7784±0.0044 |
| 7   | 102.2±1.3038 | 117    | 0.8735±0.0111 | 0.7472±0.0216 | 0.5391±0.0389 | 0.9553±0.0048 | 0.7749±0.0221 |
| 8   | 87.2±1.7889  | 100    | 0.8720±0.0179 | 0.7558±0.0270 | 0.5684±0.0440 | 0.9432±0.0141 | 0.7754±0.0299 |
| 9   | 68.6±1.8166  | 79     | 0.8684±0.0230 | 0.7683±0.0335 | 0.6000±0.0559 | 0.9365±0.0194 | 0.7839±0.0355 |
| 10  | 54.4±1.8166  | 62     | 0.8774±0.0293 | 0.7755±0.0540 | 0.6000±0.1003 | 0.9510±0.0183 | 0.7974±0.0523 |
| 11  | 47.2±0.4472  | 54     | 0.8741±0.0083 | 0.7583±0.0314 | 0.5500±0.0745 | 0.9667±0.0130 | 0.7902±0.0227 |
| 12  | 40.6±0.8944  | 50     | 0.8120±0.0179 | 0.6939±0.0246 | 0.4667±0.0456 | 0.9211±0.0186 | 0.7125±0.0271 |
| 13  | 37.2±0.4472  | 44     | 0.8455±0.0102 | 0.6625±0.0062 | 0.3750±0.0000 | 0.9500±0.0124 | 0.6894±0.0118 |
| 14  | 30.2±0.4472  | 37     | 0.8162±0.0121 | 0.6655±0.0280 | 0.4000±0.0559 | 0.9310±0.0000 | 0.6859±0.0279 |
| 15  | 24.4±0.5477  | 31     | 0.7871±0.0177 | 0.6095±0.0114 | 0.2857±0.0000 | 0.9333±0.0228 | 0.6248±0.0159 |
| 16  | 21.4±0.5477  | 28     | 0.7643±0.0196 | 0.5762±0.0391 | 0.2000±0.0782 | 0.9524±0.0000 | 0.5759±0.0538 |
| 17  | 17.8±0.4472  | 23     | 0.7739±0.0194 | 0.5667±0.0373 | 0.1333±0.0745 | 1.0000±0.0000 | 0.5480±0.0688 |
| 18  | 12.8±0.4472  | 16     | 0.8000±0.0280 | 0.6167±0.0186 | 0.2500±0.0000 | 0.9833±0.0373 | 0.6335±0.0245 |
| 19  | 7.6±0.5477   | 11     | 0.6909±0.0498 | 0.5964±0.0391 | 0.2500±0.0000 | 0.9429±0.0782 | 0.5837±0.0384 |
| 20  | 6.4±0.5477   | 10     | 0.6400±0.0548 | 0.5750±0.0456 | 0.2500±0.0000 | 0.9000±0.0913 | 0.5543±0.0417 |

Table 14: HM Random Forest with imputation, with missing flags, applying reference values, results of CV, taking best model of grid using accuracy. Predictions from outcome.

| Day | Corrects     | Totals | Accuracy      | AUC           | Sensitivity   | Specificity   | F1            |
|-----|--------------|--------|---------------|---------------|---------------|---------------|---------------|
| 1   | 170.8±1.4832 | 194    | 0.8804±0.0076 | 0.6919±0.0171 | 0.4061±0.0346 | 0.9776±0.0071 | 0.7334±0.0186 |
| 2   | 171.2±1.7889 | 194    | 0.8825±0.0092 | 0.7003±0.0164 | 0.4242±0.0303 | 0.9764±0.0081 | 0.7417±0.0195 |
| 3   | 167.6±0.5477 | 187    | 0.8963±0.0029 | 0.7252±0.0191 | 0.4733±0.0435 | 0.9771±0.0057 | 0.7669±0.0145 |
| 4   | 163.4±1.6733 | 180    | 0.9078±0.0093 | 0.7528±0.0114 | 0.5241±0.0154 | 0.9815±0.0086 | 0.7971±0.0174 |
| 5   | 145.2±1.7889 | 160    | 0.9075±0.0112 | 0.7761±0.0231 | 0.5778±0.0422 | 0.9744±0.0067 | 0.8120±0.0240 |
| 6   | 130.8±1.0954 | 142    | 0.9211±0.0077 | 0.8137±0.0272 | 0.6480±0.0593 | 0.9795±0.0076 | 0.8477±0.0193 |
| 7   | 109.6±1.1402 | 117    | 0.9368±0.0097 | 0.8720±0.0198 | 0.7652±0.0389 | 0.9787±0.0075 | 0.8937±0.0174 |
| 8   | 92.4±1.3416  | 100    | 0.9240±0.0134 | 0.8564±0.0240 | 0.7474±0.0440 | 0.9654±0.0103 | 0.8712±0.0230 |
| 9   | 73.0±0.7071  | 79     | 0.9241±0.0090 | 0.8685±0.0169 | 0.7750±0.0342 | 0.9619±0.0087 | 0.8790±0.0144 |
| 10  | 56.2±0.4472  | 62     | 0.9065±0.0072 | 0.8617±0.0172 | 0.7846±0.0344 | 0.9388±0.0000 | 0.8595±0.0124 |
| 11  | 49.8±0.4472  | 54     | 0.9222±0.0083 | 0.8845±0.0186 | 0.8167±0.0373 | 0.9524±0.0000 | 0.8867±0.0138 |
| 12  | 45.0±0.0000  | 50     | 0.9000±0.0000 | 0.8487±0.0000 | 0.7500±0.0000 | 0.9474±0.0000 | 0.8588±0.0000 |
| 13  | 39.0±0.0000  | 44     | 0.8864±0.0000 | 0.7847±0.0000 | 0.6250±0.0000 | 0.9444±0.0000 | 0.7991±0.0000 |
| 14  | 32.2±0.4472  | 37     | 0.8703±0.0121 | 0.7815±0.0077 | 0.6250±0.0000 | 0.9379±0.0154 | 0.7975±0.0147 |
| 15  | 26.2±0.4472  | 31     | 0.8452±0.0144 | 0.7583±0.0319 | 0.6000±0.0639 | 0.9167±0.0000 | 0.7684±0.0263 |
| 16  | 24.4±0.5477  | 28     | 0.8714±0.0196 | 0.7905±0.0391 | 0.6286±0.0782 | 0.9524±0.0000 | 0.8126±0.0339 |
| 17  | 19.4±0.5477  | 23     | 0.8435±0.0238 | 0.7539±0.0456 | 0.5667±0.0913 | 0.9412±0.0000 | 0.7750±0.0418 |
| 18  | 14.0±0.0000  | 16     | 0.8750±0.0000 | 0.8333±0.0000 | 0.7500±0.0000 | 0.9167±0.0000 | 0.8333±0.0000 |
| 19  | 9.0±0.0000   | 11     | 0.8182±0.0000 | 0.8036±0.0000 | 0.7500±0.0000 | 0.8571±0.0000 | 0.8036±0.0000 |
| 20  | 8.0±0.0000   | 10     | 0.8000±0.0000 | 0.7917±0.0000 | 0.7500±0.0000 | 0.8333±0.0000 | 0.7917±0.0000 |

Table 15: HM Random Forest with imputation, with missing flags, applying reference values, results of CV, taking best model of grid using F1. Predictions from admission.

| Day | Corrects     | Totals | Accuracy      | AUC           | Sensitivity   | Specificity   | F1            |
|-----|--------------|--------|---------------|---------------|---------------|---------------|---------------|
| 1   | 188.4±0.8944 | 194    | 0.9711±0.0046 | 0.9392±0.0136 | 0.8909±0.0271 | 0.9876±0.0000 | 0.9478±0.0090 |
| 2   | 184.0±0.7071 | 194    | 0.9485±0.0036 | 0.8870±0.0058 | 0.7939±0.0136 | 0.9801±0.0052 | 0.9045±0.0060 |
| 3   | 176.4±1.3416 | 187    | 0.9433±0.0072 | 0.8611±0.0142 | 0.7400±0.0279 | 0.9822±0.0070 | 0.8870±0.0140 |
| 4   | 167.6±1.5166 | 180    | 0.9311±0.0084 | 0.8252±0.0208 | 0.6690±0.0393 | 0.9815±0.0030 | 0.8586±0.0189 |
| 5   | 146.0±1.2247 | 160    | 0.9125±0.0077 | 0.7762±0.0210 | 0.5704±0.0422 | 0.9820±0.0041 | 0.8180±0.0189 |
| 6   | 125.8±0.8367 | 142    | 0.8859±0.0059 | 0.7389±0.0094 | 0.5120±0.0179 | 0.9658±0.0060 | 0.7728±0.0108 |
| 7   | 102.6±0.8944 | 117    | 0.8769±0.0076 | 0.7526±0.0125 | 0.5478±0.0238 | 0.9574±0.0075 | 0.7811±0.0131 |
| 8   | 87.4±1.5166  | 100    | 0.8740±0.0152 | 0.7571±0.0160 | 0.5684±0.0235 | 0.9457±0.0166 | 0.7781±0.0219 |
| 9   | 67.8±0.4472  | 79     | 0.8582±0.0057 | 0.7526±0.0118 | 0.5750±0.0280 | 0.9302±0.0087 | 0.7671±0.0093 |
| 10  | 54.8±0.8367  | 62     | 0.8839±0.0135 | 0.7965±0.0227 | 0.6462±0.0421 | 0.9469±0.0112 | 0.8139±0.0220 |
| 11  | 48.0±1.2247  | 54     | 0.8889±0.0227 | 0.7917±0.0404 | 0.6167±0.0745 | 0.9667±0.0130 | 0.8207±0.0402 |
| 12  | 41.2±1.3038  | 50     | 0.8240±0.0261 | 0.7018±0.0486 | 0.4667±0.0950 | 0.9368±0.0144 | 0.7233±0.0505 |
| 13  | 37.0±0.0000  | 44     | 0.8409±0.0000 | 0.6597±0.0000 | 0.3750±0.0000 | 0.9444±0.0000 | 0.6841±0.0000 |
| 14  | 30.2±0.4472  | 37     | 0.8162±0.0121 | 0.6655±0.0280 | 0.4000±0.0559 | 0.9310±0.0000 | 0.6859±0.0279 |
| 15  | 24.4±0.5477  | 31     | 0.7871±0.0177 | 0.6095±0.0114 | 0.2857±0.0000 | 0.9333±0.0228 | 0.6248±0.0159 |
| 16  | 21.8±0.4472  | 28     | 0.7786±0.0160 | 0.6048±0.0319 | 0.2571±0.0639 | 0.9524±0.0000 | 0.6152±0.0439 |
| 17  | 17.4±0.5477  | 23     | 0.7565±0.0238 | 0.5333±0.0456 | 0.0667±0.0913 | 1.0000±0.0000 | 0.4865±0.0842 |
| 18  | 12.8±0.4472  | 16     | 0.8000±0.0280 | 0.6167±0.0186 | 0.2500±0.0000 | 0.9833±0.0373 | 0.6335±0.0245 |
| 19  | 7.0±0.7071   | 11     | 0.6364±0.0643 | 0.5536±0.0505 | 0.2500±0.0000 | 0.8571±0.1010 | 0.5426±0.0479 |
| 20  | 6.6±0.5477   | 10     | 0.6600±0.0548 | 0.5917±0.0456 | 0.2500±0.0000 | 0.9333±0.0913 | 0.5695±0.0417 |

Table 16: HM Random Forest with imputation, with missing flags, applying reference values, results of CV, taking best model of grid using F1. Predictions from outcome.

| Day | Corrects     | Totals | Accuracy      | AUC           | Sensitivity   | Specificity   | F1            |
|-----|--------------|--------|---------------|---------------|---------------|---------------|---------------|
| 1   | 168.2±1.3038 | 194    | 0.8670±0.0067 | 0.6814±0.0137 | 0.4000±0.0254 | 0.9627±0.0044 | 0.7144±0.0156 |
| 2   | 170.0±0.0000 | 194    | 0.8763±0.0000 | 0.6797±0.0066 | 0.3818±0.0166 | 0.9776±0.0034 | 0.7206±0.0054 |
| 3   | 168.4±2.6077 | 187    | 0.9005±0.0139 | 0.7331±0.0212 | 0.4867±0.0380 | 0.9796±0.0138 | 0.7772±0.0274 |
| 4   | 168.0±0.7071 | 180    | 0.9333±0.0039 | 0.8154±0.0080 | 0.6414±0.0189 | 0.9894±0.0059 | 0.8588±0.0071 |
| 5   | 148.8±1.4832 | 160    | 0.9300±0.0093 | 0.8133±0.0266 | 0.6370±0.0549 | 0.9895±0.0067 | 0.8563±0.0222 |
| 6   | 133.6±1.1402 | 142    | 0.9408±0.0080 | 0.8477±0.0228 | 0.7040±0.0456 | 0.9915±0.0000 | 0.8859±0.0180 |
| 7   | 108.4±0.5477 | 117    | 0.9265±0.0047 | 0.8492±0.0111 | 0.7217±0.0238 | 0.9766±0.0048 | 0.8747±0.0087 |
| 8   | 91.0±1.2247  | 100    | 0.9100±0.0122 | 0.8196±0.0243 | 0.6737±0.0440 | 0.9654±0.0055 | 0.8425±0.0229 |
| 9   | 72.2±1.3038  | 79     | 0.9139±0.0165 | 0.8435±0.0222 | 0.7250±0.0342 | 0.9619±0.0142 | 0.8603±0.0258 |
| 10  | 56.4±0.8944  | 62     | 0.9097±0.0144 | 0.8524±0.0211 | 0.7538±0.0344 | 0.9510±0.0112 | 0.8606±0.0220 |
| 11  | 49.2±0.4472  | 54     | 0.9111±0.0083 | 0.8536±0.0053 | 0.7500±0.0000 | 0.9571±0.0106 | 0.8667±0.0107 |
| 12  | 44.8±0.8367  | 50     | 0.8960±0.0167 | 0.8461±0.0110 | 0.7500±0.0000 | 0.9421±0.0220 | 0.8544±0.0200 |
| 13  | 38.6±0.5477  | 44     | 0.8773±0.0124 | 0.7792±0.0076 | 0.6250±0.0000 | 0.9333±0.0152 | 0.7878±0.0155 |
| 14  | 32.6±0.5477  | 37     | 0.8811±0.0148 | 0.8246±0.0271 | 0.7250±0.0559 | 0.9241±0.0154 | 0.8243±0.0231 |
| 15  | 26.0±0.0000  | 31     | 0.8387±0.0000 | 0.7440±0.0000 | 0.5714±0.0000 | 0.9167±0.0000 | 0.7567±0.0000 |
| 16  | 23.4±0.5477  | 28     | 0.8357±0.0196 | 0.7571±0.0310 | 0.6000±0.0639 | 0.9143±0.0213 | 0.7692±0.0280 |
| 17  | 19.0±0.0000  | 23     | 0.8261±0.0000 | 0.7206±0.0000 | 0.5000±0.0000 | 0.9412±0.0000 | 0.7444±0.0000 |
| 18  | 14.0±0.0000  | 16     | 0.8750±0.0000 | 0.8333±0.0000 | 0.7500±0.0000 | 0.9167±0.0000 | 0.8333±0.0000 |
| 19  | 9.0±0.0000   | 11     | 0.8182±0.0000 | 0.8036±0.0000 | 0.7500±0.0000 | 0.8571±0.0000 | 0.8036±0.0000 |
| 20  | 8.0±0.0000   | 10     | 0.8000±0.0000 | 0.7917±0.0000 | 0.7500±0.0000 | 0.8333±0.0000 | 0.7917±0.0000 |

Table 17: HM Random Forest with missing flags, results of CV, taking best model of grid using accuracy. Predictions from admission.

| Day | Corrects     | Totals | Accuracy      | AUC           | Sensitivity   | Specificity   | F1            |
|-----|--------------|--------|---------------|---------------|---------------|---------------|---------------|
| 1   | 184.8±1.4832 | 194    | 0.9526±0.0076 | 0.8943±0.0097 | 0.8061±0.0166 | 0.9826±0.0081 | 0.9123±0.0132 |
| 2   | 183.8±0.8367 | 194    | 0.9474±0.0043 | 0.8888±0.0155 | 0.8000±0.0346 | 0.9776±0.0056 | 0.9032±0.0089 |
| 3   | 177.4±1.1402 | 187    | 0.9487±0.0061 | 0.8724±0.0146 | 0.7600±0.0279 | 0.9847±0.0035 | 0.8979±0.0127 |
| 4   | 169.6±0.5477 | 180    | 0.9422±0.0030 | 0.8541±0.0100 | 0.7241±0.0244 | 0.9841±0.0059 | 0.8838±0.0058 |
| 5   | 148.0±1.2247 | 160    | 0.9250±0.0077 | 0.8073±0.0221 | 0.6296±0.0454 | 0.9850±0.0053 | 0.8474±0.0178 |
| 6   | 128.0±1.2247 | 142    | 0.9014±0.0086 | 0.7798±0.0088 | 0.5920±0.0179 | 0.9675±0.0111 | 0.8105±0.0125 |
| 7   | 104.0±1.0000 | 117    | 0.8889±0.0085 | 0.7667±0.0158 | 0.5652±0.0307 | 0.9681±0.0075 | 0.7999±0.0159 |
| 8   | 89.4±1.3416  | 100    | 0.8940±0.0134 | 0.7694±0.0340 | 0.5684±0.0686 | 0.9704±0.0068 | 0.8030±0.0308 |
| 9   | 68.0±0.7071  | 79     | 0.8608±0.0090 | 0.7262±0.0056 | 0.5000±0.0000 | 0.9524±0.0112 | 0.7545±0.0107 |
| 10  | 53.2±0.8367  | 62     | 0.8581±0.0135 | 0.7633±0.0201 | 0.6000±0.0344 | 0.9265±0.0112 | 0.7755±0.0211 |
| 11  | 47.2±1.3038  | 54     | 0.8741±0.0241 | 0.7583±0.0416 | 0.5500±0.0745 | 0.9667±0.0130 | 0.7907±0.0448 |
| 12  | 41.8±0.8367  | 50     | 0.8360±0.0167 | 0.7096±0.0355 | 0.4667±0.0745 | 0.9526±0.0118 | 0.7366±0.0342 |
| 13  | 37.8±0.8367  | 44     | 0.8591±0.0190 | 0.6806±0.0318 | 0.4000±0.0559 | 0.9611±0.0152 | 0.7127±0.0369 |
| 14  | 29.4±0.5477  | 37     | 0.7946±0.0148 | 0.6517±0.0271 | 0.4000±0.0559 | 0.9034±0.0154 | 0.6647±0.0263 |
| 15  | 24.0±0.0000  | 31     | 0.7742±0.0000 | 0.6012±0.0000 | 0.2857±0.0000 | 0.9167±0.0000 | 0.6132±0.0000 |
| 16  | 20.6±0.5477  | 28     | 0.7357±0.0196 | 0.5667±0.0391 | 0.2286±0.0782 | 0.9048±0.0000 | 0.5676±0.0498 |
| 17  | 17.8±0.4472  | 23     | 0.7739±0.0194 | 0.5775±0.0132 | 0.1667±0.0000 | 0.9882±0.0263 | 0.5722±0.0146 |
| 18  | 11.6±0.5477  | 16     | 0.7250±0.0342 | 0.5000±0.0510 | 0.0500±0.1118 | 0.9500±0.0456 | 0.4523±0.0775 |
| 19  | 7.0±0.0000   | 11     | 0.6364±0.0000 | 0.5536±0.0000 | 0.2500±0.0000 | 0.8571±0.0000 | 0.5417±0.0000 |
| 20  | 6.2±0.4472   | 10     | 0.6200±0.0447 | 0.5583±0.0373 | 0.2500±0.0000 | 0.8667±0.0745 | 0.5390±0.0341 |

Table 18: HM Random Forest with missing flags, results of CV, taking best model of grid using accuracy. Predictions from outcome.

| Day | Corrects     | Totals | Accuracy      | AUC           | Sensitivity   | Specificity   | F1            |
|-----|--------------|--------|---------------|---------------|---------------|---------------|---------------|
| 1   | 168.0±1.2247 | 194    | 0.8660±0.0063 | 0.6783±0.0120 | 0.3939±0.0214 | 0.9627±0.0044 | 0.7113±0.0139 |
| 2   | 169.4±0.8944 | 194    | 0.8732±0.0046 | 0.6682±0.0124 | 0.3576±0.0254 | 0.9789±0.0034 | 0.7084±0.0139 |
| 3   | 168.2±2.1679 | 187    | 0.8995±0.0116 | 0.7298±0.0268 | 0.4800±0.0558 | 0.9796±0.0123 | 0.7733±0.0271 |
| 4   | 166.8±1.4832 | 180    | 0.9267±0.0082 | 0.7975±0.0201 | 0.6069±0.0393 | 0.9881±0.0055 | 0.8423±0.0192 |
| 5   | 148.4±2.0736 | 160    | 0.9275±0.0130 | 0.8088±0.0385 | 0.6296±0.0786 | 0.9880±0.0067 | 0.8506±0.0322 |
| 6   | 132.4±1.5166 | 142    | 0.9324±0.0107 | 0.8300±0.0235 | 0.6720±0.0438 | 0.9880±0.0047 | 0.8687±0.0221 |
| 7   | 108.8±0.8367 | 117    | 0.9299±0.0072 | 0.8546±0.0182 | 0.7304±0.0364 | 0.9787±0.0000 | 0.8804±0.0140 |
| 8   | 90.4±1.3416  | 100    | 0.9040±0.0134 | 0.8159±0.0250 | 0.6737±0.0440 | 0.9580±0.0068 | 0.8344±0.0242 |
| 9   | 71.6±1.1402  | 79     | 0.9063±0.0144 | 0.8294±0.0279 | 0.7000±0.0523 | 0.9587±0.0087 | 0.8467±0.0253 |
| 10  | 56.0±0.7071  | 62     | 0.9032±0.0114 | 0.8427±0.0209 | 0.7385±0.0421 | 0.9469±0.0112 | 0.8505±0.0181 |
| 11  | 49.2±1.0954  | 54     | 0.9111±0.0203 | 0.8536±0.0338 | 0.7500±0.0589 | 0.9571±0.0106 | 0.8663±0.0318 |
| 12  | 44.8±0.8367  | 50     | 0.8960±0.0167 | 0.8461±0.0110 | 0.7500±0.0000 | 0.9421±0.0220 | 0.8544±0.0200 |
| 13  | 38.6±0.8944  | 44     | 0.8773±0.0203 | 0.7792±0.0124 | 0.6250±0.0000 | 0.9333±0.0248 | 0.7883±0.0264 |
| 14  | 32.4±0.5477  | 37     | 0.8757±0.0148 | 0.8211±0.0256 | 0.7250±0.0559 | 0.9172±0.0189 | 0.8180±0.0218 |
| 15  | 25.8±0.4472  | 31     | 0.8323±0.0144 | 0.7399±0.0093 | 0.5714±0.0000 | 0.9083±0.0186 | 0.7500±0.0150 |
| 16  | 23.6±0.5477  | 28     | 0.8429±0.0196 | 0.7619±0.0292 | 0.6000±0.0639 | 0.9238±0.0261 | 0.7769±0.0265 |
| 17  | 19.2±0.4472  | 23     | 0.8348±0.0194 | 0.7373±0.0373 | 0.5333±0.0745 | 0.9412±0.0000 | 0.7597±0.0341 |
| 18  | 14.0±0.0000  | 16     | 0.8750±0.0000 | 0.8333±0.0000 | 0.7500±0.0000 | 0.9167±0.0000 | 0.8333±0.0000 |
| 19  | 9.0±0.0000   | 11     | 0.8182±0.0000 | 0.8036±0.0000 | 0.7500±0.0000 | 0.8571±0.0000 | 0.8036±0.0000 |
| 20  | 8.0±0.0000   | 10     | 0.8000±0.0000 | 0.7917±0.0000 | 0.7500±0.0000 | 0.8333±0.0000 | 0.7917±0.0000 |

Table 19: HM Random Forest with missing flags, results of CV, taking best model of grid using F1. Predictions from admission.

| Day | Corrects     | Totals | Accuracy      | AUC           | Sensitivity   | Specificity   | F1            |
|-----|--------------|--------|---------------|---------------|---------------|---------------|---------------|
| 1   | 184.4±1.5166 | 194    | 0.9505±0.0078 | 0.8883±0.0100 | 0.7939±0.0136 | 0.9826±0.0068 | 0.9079±0.0139 |
| 2   | 183.4±0.8944 | 194    | 0.9454±0.0046 | 0.8828±0.0099 | 0.7879±0.0214 | 0.9776±0.0056 | 0.8990±0.0082 |
| 3   | 177.0±0.7071 | 187    | 0.9465±0.0038 | 0.8657±0.0139 | 0.7467±0.0298 | 0.9847±0.0035 | 0.8930±0.0090 |
| 4   | 169.6±0.5477 | 180    | 0.9422±0.0030 | 0.8541±0.0100 | 0.7241±0.0244 | 0.9841±0.0059 | 0.8838±0.0058 |
| 5   | 147.4±1.1402 | 160    | 0.9213±0.0071 | 0.7962±0.0120 | 0.6074±0.0203 | 0.9850±0.0053 | 0.8383±0.0142 |
| 6   | 128.0±0.7071 | 142    | 0.9014±0.0050 | 0.7829±0.0030 | 0.6000±0.0000 | 0.9658±0.0060 | 0.8118±0.0070 |
| 7   | 102.6±0.5477 | 117    | 0.8769±0.0047 | 0.7461±0.0089 | 0.5304±0.0194 | 0.9617±0.0058 | 0.7775±0.0084 |
| 8   | 88.8±0.8367  | 100    | 0.8880±0.0084 | 0.7576±0.0224 | 0.5474±0.0471 | 0.9679±0.0068 | 0.7913±0.0188 |
| 9   | 67.8±1.3038  | 79     | 0.8582±0.0165 | 0.7199±0.0290 | 0.4875±0.0523 | 0.9524±0.0112 | 0.7481±0.0308 |
| 10  | 53.0±1.0000  | 62     | 0.8548±0.0161 | 0.7556±0.0251 | 0.5846±0.0421 | 0.9265±0.0112 | 0.7689±0.0260 |
| 11  | 46.8±0.4472  | 54     | 0.8667±0.0083 | 0.7476±0.0191 | 0.5333±0.0456 | 0.9619±0.0130 | 0.7787±0.0159 |
| 12  | 42.2±0.8367  | 50     | 0.8440±0.0167 | 0.7206±0.0332 | 0.4833±0.0697 | 0.9579±0.0144 | 0.7496±0.0327 |
| 13  | 37.2±0.8367  | 44     | 0.8455±0.0190 | 0.6625±0.0116 | 0.3750±0.0000 | 0.9500±0.0232 | 0.6899±0.0212 |
| 14  | 29.4±0.5477  | 37     | 0.7946±0.0148 | 0.6517±0.0271 | 0.4000±0.0559 | 0.9034±0.0154 | 0.6647±0.0263 |
| 15  | 24.0±0.0000  | 31     | 0.7742±0.0000 | 0.6012±0.0000 | 0.2857±0.0000 | 0.9167±0.0000 | 0.6132±0.0000 |
| 16  | 20.6±0.5477  | 28     | 0.7357±0.0196 | 0.5667±0.0391 | 0.2286±0.0782 | 0.9048±0.0000 | 0.5676±0.0498 |
| 17  | 17.8±0.4472  | 23     | 0.7739±0.0194 | 0.5775±0.0132 | 0.1667±0.0000 | 0.9882±0.0263 | 0.5722±0.0146 |
| 18  | 11.4±0.5477  | 16     | 0.7125±0.0342 | 0.4917±0.0543 | 0.0500±0.1118 | 0.9333±0.0373 | 0.4481±0.0797 |
| 19  | 7.0±0.0000   | 11     | 0.6364±0.0000 | 0.5536±0.0000 | 0.2500±0.0000 | 0.8571±0.0000 | 0.5417±0.0000 |
| 20  | 6.2±0.4472   | 10     | 0.6200±0.0447 | 0.5583±0.0373 | 0.2500±0.0000 | 0.8667±0.0745 | 0.5390±0.0341 |

Table 20: HM Random Forest with missing flags, results of CV, taking best model of grid using F1. Predictions from outcome.

| Day | Corrects     | Totals | Accuracy      | AUC           | Sensitivity   | Specificity   | F1            |
|-----|--------------|--------|---------------|---------------|---------------|---------------|---------------|
| 1   | 168.8±1.7889 | 194    | 0.8701±0.0092 | 0.6880±0.0237 | 0.4121±0.0460 | 0.9640±0.0028 | 0.7216±0.0253 |
| 2   | 171.4±1.5166 | 194    | 0.8835±0.0078 | 0.7034±0.0145 | 0.4303±0.0254 | 0.9764±0.0052 | 0.7449±0.0174 |
| 3   | 168.4±1.3416 | 187    | 0.9005±0.0072 | 0.7412±0.0082 | 0.5067±0.0149 | 0.9758±0.0083 | 0.7817±0.0119 |
| 4   | 168.4±1.1402 | 180    | 0.9356±0.0063 | 0.8167±0.0107 | 0.6414±0.0189 | 0.9921±0.0055 | 0.8625±0.0129 |
| 5   | 149.2±1.4832 | 160    | 0.9325±0.0093 | 0.8295±0.0275 | 0.6741±0.0549 | 0.9850±0.0000 | 0.8653±0.0222 |
| 6   | 133.4±1.3416 | 142    | 0.9394±0.0094 | 0.8532±0.0239 | 0.7200±0.0490 | 0.9863±0.0076 | 0.8854±0.0195 |
| 7   | 109.8±0.4472 | 117    | 0.9385±0.0038 | 0.8829±0.0157 | 0.7913±0.0364 | 0.9745±0.0058 | 0.8984±0.0083 |
| 8   | 91.6±1.1402  | 100    | 0.9160±0.0114 | 0.8313±0.0148 | 0.6947±0.0235 | 0.9679±0.0110 | 0.8540±0.0180 |
| 9   | 71.4±0.5477  | 79     | 0.9038±0.0069 | 0.8138±0.0249 | 0.6625±0.0559 | 0.9651±0.0071 | 0.8382±0.0164 |
| 10  | 56.2±1.3038  | 62     | 0.9065±0.0210 | 0.8447±0.0276 | 0.7385±0.0421 | 0.9510±0.0183 | 0.8549±0.0306 |
| 11  | 48.8±0.4472  | 54     | 0.9037±0.0083 | 0.8369±0.0319 | 0.7167±0.0745 | 0.9571±0.0106 | 0.8527±0.0206 |
| 12  | 43.4±0.5477  | 50     | 0.8680±0.0110 | 0.7991±0.0072 | 0.6667±0.0000 | 0.9316±0.0144 | 0.8115±0.0125 |
| 13  | 38.4±0.5477  | 44     | 0.8727±0.0124 | 0.7764±0.0076 | 0.6250±0.0000 | 0.9278±0.0152 | 0.7821±0.0155 |
| 14  | 32.2±0.8367  | 37     | 0.8703±0.0226 | 0.7996±0.0380 | 0.6750±0.0685 | 0.9241±0.0154 | 0.8047±0.0349 |
| 15  | 26.0±0.0000  | 31     | 0.8387±0.0000 | 0.7440±0.0000 | 0.5714±0.0000 | 0.9167±0.0000 | 0.7567±0.0000 |
| 16  | 23.6±0.5477  | 28     | 0.8429±0.0196 | 0.7524±0.0130 | 0.5714±0.0000 | 0.9333±0.0261 | 0.7725±0.0210 |
| 17  | 18.8±0.4472  | 23     | 0.8174±0.0194 | 0.7147±0.0132 | 0.5000±0.0000 | 0.9294±0.0263 | 0.7358±0.0193 |
| 18  | 14.0±0.0000  | 16     | 0.8750±0.0000 | 0.8333±0.0000 | 0.7500±0.0000 | 0.9167±0.0000 | 0.8333±0.0000 |
| 19  | 9.0±0.0000   | 11     | 0.8182±0.0000 | 0.8036±0.0000 | 0.7500±0.0000 | 0.8571±0.0000 | 0.8036±0.0000 |
| 20  | 8.0±0.0000   | 10     | 0.8000±0.0000 | 0.7917±0.0000 | 0.7500±0.0000 | 0.8333±0.0000 | 0.7917±0.0000 |

Table 21: HM Random Forest applying laboratory reference values, results of CV, taking best model of grid using accuracy. Predictions from admission.

| Day | Corrects     | Totals | Accuracy      | AUC           | Sensitivity   | Specificity   | F1            |
|-----|--------------|--------|---------------|---------------|---------------|---------------|---------------|
| 1   | 185.0±1.5811 | 194    | 0.9536±0.0082 | 0.8950±0.0111 | 0.8061±0.0166 | 0.9839±0.0071 | 0.9139±0.0145 |
| 2   | 184.0±0.7071 | 194    | 0.9485±0.0036 | 0.9039±0.0082 | 0.8364±0.0166 | 0.9714±0.0034 | 0.9078±0.0066 |
| 3   | 177.8±0.8367 | 187    | 0.9508±0.0045 | 0.8844±0.0098 | 0.7867±0.0183 | 0.9822±0.0028 | 0.9039±0.0090 |
| 4   | 169.0±0.7071 | 180    | 0.9389±0.0039 | 0.8493±0.0137 | 0.7172±0.0289 | 0.9815±0.0030 | 0.8774±0.0093 |
| 5   | 148.2±0.4472 | 160    | 0.9263±0.0028 | 0.8140±0.0092 | 0.6444±0.0203 | 0.9835±0.0034 | 0.8518±0.0066 |
| 6   | 128.0±0.7071 | 142    | 0.9014±0.0050 | 0.7672±0.0030 | 0.5600±0.0000 | 0.9744±0.0060 | 0.8045±0.0072 |
| 7   | 103.0±1.4142 | 117    | 0.8803±0.0121 | 0.7613±0.0269 | 0.5652±0.0532 | 0.9574±0.0075 | 0.7885±0.0243 |
| 8   | 89.6±1.5166  | 100    | 0.8960±0.0152 | 0.7827±0.0322 | 0.6000±0.0600 | 0.9654±0.0055 | 0.8117±0.0307 |
| 9   | 68.2±1.0954  | 79     | 0.8633±0.0139 | 0.7371±0.0290 | 0.5250±0.0559 | 0.9492±0.0071 | 0.7625±0.0273 |
| 10  | 53.6±0.8944  | 62     | 0.8645±0.0144 | 0.7730±0.0278 | 0.6154±0.0544 | 0.9306±0.0112 | 0.7854±0.0250 |
| 11  | 47.8±0.4472  | 54     | 0.8852±0.0083 | 0.7774±0.0053 | 0.5833±0.0000 | 0.9714±0.0106 | 0.8113±0.0102 |
| 12  | 41.4±0.5477  | 50     | 0.8280±0.0110 | 0.6987±0.0228 | 0.4500±0.0456 | 0.9474±0.0000 | 0.7246±0.0232 |
| 13  | 36.6±1.1402  | 44     | 0.8318±0.0259 | 0.6542±0.0158 | 0.3750±0.0000 | 0.9333±0.0317 | 0.6755±0.0273 |
| 14  | 29.4±0.5477  | 37     | 0.7946±0.0148 | 0.6427±0.0094 | 0.3750±0.0000 | 0.9103±0.0189 | 0.6579±0.0141 |
| 15  | 24.2±0.4472  | 31     | 0.7806±0.0144 | 0.6054±0.0093 | 0.2857±0.0000 | 0.9250±0.0186 | 0.6190±0.0130 |
| 16  | 22.0±0.0000  | 28     | 0.7857±0.0000 | 0.6190±0.0000 | 0.2857±0.0000 | 0.9524±0.0000 | 0.6348±0.0000 |
| 17  | 17.6±0.8944  | 23     | 0.7652±0.0389 | 0.5608±0.0504 | 0.1333±0.0745 | 0.9882±0.0263 | 0.5451±0.0754 |
| 18  | 12.4±0.5477  | 16     | 0.7750±0.0342 | 0.5500±0.0685 | 0.1000±0.1369 | 1.0000±0.0000 | 0.5149±0.1182 |
| 19  | 7.4±0.5477   | 11     | 0.6727±0.0498 | 0.5821±0.0391 | 0.2500±0.0000 | 0.9143±0.0782 | 0.5697±0.0384 |
| 20  | 5.6±0.5477   | 10     | 0.5600±0.0548 | 0.5083±0.0456 | 0.2500±0.0000 | 0.7667±0.0913 | 0.4945±0.0401 |

Table 22: HM Random Forest applying laboratory reference values, results of CV, taking best model of grid using accuracy. Predictions from outcome.

| Day | Corrects     | Totals | Accuracy      | AUC           | Sensitivity   | Specificity   | F1            |
|-----|--------------|--------|---------------|---------------|---------------|---------------|---------------|
| 1   | 168.4±1.5166 | 194    | 0.8680±0.0078 | 0.6868±0.0265 | 0.4121±0.0550 | 0.9615±0.0028 | 0.7186±0.0262 |
| 2   | 170.8±1.6432 | 194    | 0.8804±0.0085 | 0.7015±0.0150 | 0.4303±0.0254 | 0.9727±0.0056 | 0.7407±0.0181 |
| 3   | 168.4±0.8944 | 187    | 0.9005±0.0048 | 0.7466±0.0131 | 0.5200±0.0298 | 0.9732±0.0070 | 0.7844±0.0106 |
| 4   | 168.0±0.7071 | 180    | 0.9333±0.0039 | 0.8098±0.0128 | 0.6276±0.0289 | 0.9921±0.0055 | 0.8567±0.0092 |
| 5   | 149.4±0.8944 | 160    | 0.9337±0.0056 | 0.8332±0.0166 | 0.6815±0.0331 | 0.9850±0.0000 | 0.8686±0.0133 |
| 6   | 133.2±1.6432 | 142    | 0.9380±0.0116 | 0.8555±0.0196 | 0.7280±0.0335 | 0.9829±0.0085 | 0.8843±0.0213 |
| 7   | 109.4±0.8944 | 117    | 0.9350±0.0076 | 0.8709±0.0223 | 0.7652±0.0496 | 0.9766±0.0089 | 0.8911±0.0147 |
| 8   | 91.2±1.0954  | 100    | 0.9120±0.0110 | 0.8288±0.0155 | 0.6947±0.0235 | 0.9630±0.0087 | 0.8484±0.0180 |
| 9   | 71.4±0.5477  | 79     | 0.9038±0.0069 | 0.8138±0.0249 | 0.6625±0.0559 | 0.9651±0.0071 | 0.8382±0.0164 |
| 10  | 56.6±0.8944  | 62     | 0.9129±0.0144 | 0.8545±0.0218 | 0.7538±0.0344 | 0.9551±0.0091 | 0.8647±0.0224 |
| 11  | 49.0±0.7071  | 54     | 0.9074±0.0131 | 0.8512±0.0295 | 0.7500±0.0589 | 0.9524±0.0000 | 0.8615±0.0227 |
| 12  | 43.4±0.5477  | 50     | 0.8680±0.0110 | 0.7991±0.0072 | 0.6667±0.0000 | 0.9316±0.0144 | 0.8115±0.0125 |
| 13  | 38.6±0.5477  | 44     | 0.8773±0.0124 | 0.7792±0.0076 | 0.6250±0.0000 | 0.9333±0.0152 | 0.7878±0.0155 |
| 14  | 32.0±0.7071  | 37     | 0.8649±0.0191 | 0.7961±0.0340 | 0.6750±0.0685 | 0.9172±0.0189 | 0.7985±0.0292 |
| 15  | 26.0±0.0000  | 31     | 0.8387±0.0000 | 0.7440±0.0000 | 0.5714±0.0000 | 0.9167±0.0000 | 0.7567±0.0000 |
| 16  | 23.4±0.5477  | 28     | 0.8357±0.0196 | 0.7476±0.0130 | 0.5714±0.0000 | 0.9238±0.0261 | 0.7649±0.0210 |
| 17  | 19.0±0.0000  | 23     | 0.8261±0.0000 | 0.7206±0.0000 | 0.5000±0.0000 | 0.9412±0.0000 | 0.7444±0.0000 |
| 18  | 14.0±0.0000  | 16     | 0.8750±0.0000 | 0.8333±0.0000 | 0.7500±0.0000 | 0.9167±0.0000 | 0.8333±0.0000 |
| 19  | 9.0±0.0000   | 11     | 0.8182±0.0000 | 0.8036±0.0000 | 0.7500±0.0000 | 0.8571±0.0000 | 0.8036±0.0000 |
| 20  | 8.0±0.0000   | 10     | 0.8000±0.0000 | 0.7917±0.0000 | 0.7500±0.0000 | 0.8333±0.0000 | 0.7917±0.0000 |

Table 23: HM Random Forest applying laboratory reference values, results of CV, taking best model of grid using F1. Predictions from admission.

| Day | Corrects     | Totals | Accuracy      | AUC           | Sensitivity   | Specificity   | F1            |
|-----|--------------|--------|---------------|---------------|---------------|---------------|---------------|
| 1   | 184.6±1.1402 | 194    | 0.9515±0.0059 | 0.8961±0.0085 | 0.8121±0.0136 | 0.9801±0.0052 | 0.9110±0.0104 |
| 2   | 184.2±0.8367 | 194    | 0.9495±0.0043 | 0.9021±0.0124 | 0.8303±0.0271 | 0.9739±0.0052 | 0.9090±0.0081 |
| 3   | 178.0±1.0000 | 187    | 0.9519±0.0053 | 0.8877±0.0082 | 0.7933±0.0149 | 0.9822±0.0053 | 0.9064±0.0098 |
| 4   | 169.0±0.0000 | 180    | 0.9389±0.0000 | 0.8493±0.0062 | 0.7172±0.0154 | 0.9815±0.0030 | 0.8775±0.0018 |
| 5   | 148.2±1.3038 | 160    | 0.9263±0.0081 | 0.8199±0.0207 | 0.6593±0.0406 | 0.9805±0.0041 | 0.8537±0.0180 |
| 6   | 127.6±0.5477 | 142    | 0.8986±0.0039 | 0.7623±0.0087 | 0.5520±0.0179 | 0.9726±0.0038 | 0.7988±0.0082 |
| 7   | 103.2±1.4832 | 117    | 0.8821±0.0127 | 0.7690±0.0318 | 0.5826±0.0659 | 0.9553±0.0089 | 0.7937±0.0270 |
| 8   | 89.4±1.5166  | 100    | 0.8940±0.0152 | 0.7775±0.0314 | 0.5895±0.0577 | 0.9654±0.0055 | 0.8072±0.0303 |
| 9   | 67.8±1.0954  | 79     | 0.8582±0.0139 | 0.7339±0.0271 | 0.5250±0.0559 | 0.9429±0.0142 | 0.7565±0.0245 |
| 10  | 53.8±1.3038  | 62     | 0.8677±0.0210 | 0.7750±0.0318 | 0.6154±0.0544 | 0.9347±0.0171 | 0.7894±0.0333 |
| 11  | 47.8±0.4472  | 54     | 0.8852±0.0083 | 0.7774±0.0053 | 0.5833±0.0000 | 0.9714±0.0106 | 0.8113±0.0102 |
| 12  | 41.2±0.4472  | 50     | 0.8240±0.0089 | 0.6904±0.0186 | 0.4333±0.0373 | 0.9474±0.0000 | 0.7161±0.0190 |
| 13  | 36.4±1.1402  | 44     | 0.8273±0.0259 | 0.6514±0.0158 | 0.3750±0.0000 | 0.9278±0.0317 | 0.6707±0.0275 |
| 14  | 29.2±0.4472  | 37     | 0.7892±0.0121 | 0.6392±0.0077 | 0.3750±0.0000 | 0.9034±0.0154 | 0.6528±0.0115 |
| 15  | 24.2±0.4472  | 31     | 0.7806±0.0144 | 0.6054±0.0093 | 0.2857±0.0000 | 0.9250±0.0186 | 0.6190±0.0130 |
| 16  | 22.0±0.0000  | 28     | 0.7857±0.0000 | 0.6190±0.0000 | 0.2857±0.0000 | 0.9524±0.0000 | 0.6348±0.0000 |
| 17  | 17.4±0.5477  | 23     | 0.7565±0.0238 | 0.5549±0.0340 | 0.1333±0.0745 | 0.9765±0.0322 | 0.5349±0.0636 |
| 18  | 12.4±0.5477  | 16     | 0.7750±0.0342 | 0.5500±0.0685 | 0.1000±0.1369 | 1.0000±0.0000 | 0.5149±0.1182 |
| 19  | 7.2±0.4472   | 11     | 0.6545±0.0407 | 0.5679±0.0319 | 0.2500±0.0000 | 0.8857±0.0639 | 0.5557±0.0313 |
| 20  | 5.6±0.5477   | 10     | 0.5600±0.0548 | 0.5083±0.0456 | 0.2500±0.0000 | 0.7667±0.0913 | 0.4945±0.0401 |

Table 24: HM Random Forest applying laboratory reference values, results of CV, taking best model of grid using F1. Predictions from outcome.

## 2.2 SVC Daily Results

| Day | Corrects     | Totals | Accuracy      | AUC           | Sensitivity   | Specificity   | F1            |
|-----|--------------|--------|---------------|---------------|---------------|---------------|---------------|
| 1   | 162.8±1.3038 | 194    | 0.8392±0.0067 | 0.7610±0.0034 | 0.6424±0.0136 | 0.8795±0.0104 | 0.7385±0.0057 |
| 2   | 168.8±1.6432 | 194    | 0.8701±0.0085 | 0.7386±0.0165 | 0.5394±0.0332 | 0.9379±0.0088 | 0.7542±0.0158 |
| 3   | 166.2±1.6432 | 187    | 0.8888±0.0088 | 0.7639±0.0339 | 0.5800±0.0730 | 0.9478±0.0083 | 0.7794±0.0243 |
| 4   | 161.2±2.2804 | 180    | 0.8956±0.0127 | 0.7957±0.0156 | 0.6483±0.0289 | 0.9430±0.0145 | 0.8026±0.0199 |
| 5   | 148.2±1.3038 | 160    | 0.9263±0.0081 | 0.8228±0.0147 | 0.6667±0.0262 | 0.9789±0.0063 | 0.8549±0.0158 |
| 6   | 129.2±1.7889 | 142    | 0.9099±0.0126 | 0.8163±0.0268 | 0.6720±0.0522 | 0.9607±0.0097 | 0.8349±0.0244 |
| 7   | 106.2±0.8367 | 117    | 0.9077±0.0072 | 0.8440±0.0045 | 0.7391±0.0000 | 0.9489±0.0089 | 0.8510±0.0094 |
| 8   | 87.6±1.5166  | 100    | 0.8760±0.0152 | 0.7623±0.0094 | 0.5789±0.0000 | 0.9457±0.0187 | 0.7828±0.0195 |
| 9   | 69.6±0.5477  | 79     | 0.8810±0.0069 | 0.7855±0.0043 | 0.6250±0.0000 | 0.9460±0.0087 | 0.8037±0.0086 |
| 10  | 53.4±0.8944  | 62     | 0.8613±0.0144 | 0.7766±0.0319 | 0.6308±0.0644 | 0.9224±0.0091 | 0.7840±0.0268 |
| 11  | 48.0±0.0000  | 54     | 0.8889±0.0000 | 0.8095±0.0000 | 0.6667±0.0000 | 0.9524±0.0000 | 0.8288±0.0000 |
| 12  | 42.6±0.5477  | 50     | 0.8520±0.0110 | 0.7487±0.0228 | 0.5500±0.0456 | 0.9474±0.0000 | 0.7734±0.0214 |
| 13  | 37.0±0.7071  | 44     | 0.8409±0.0161 | 0.6694±0.0301 | 0.4000±0.0559 | 0.9389±0.0124 | 0.6915±0.0317 |
| 14  | 30.8±0.4472  | 37     | 0.8324±0.0121 | 0.7121±0.0077 | 0.5000±0.0000 | 0.9241±0.0154 | 0.7300±0.0127 |
| 15  | 24.2±0.4472  | 31     | 0.7806±0.0144 | 0.6155±0.0319 | 0.3143±0.0639 | 0.9167±0.0000 | 0.6286±0.0344 |
| 16  | 22.6±0.8944  | 28     | 0.8071±0.0319 | 0.6905±0.0412 | 0.4571±0.0639 | 0.9238±0.0261 | 0.7101±0.0461 |
| 17  | 20.2±0.8367  | 23     | 0.8783±0.0364 | 0.8206±0.0697 | 0.7000±0.1394 | 0.9412±0.0000 | 0.8321±0.0592 |
| 18  | 14.8±0.4472  | 16     | 0.9250±0.0280 | 0.8667±0.0186 | 0.7500±0.0000 | 0.9833±0.0373 | 0.8935±0.0336 |
| 19  | 8.8±0.8367   | 11     | 0.8000±0.0761 | 0.8000±0.0803 | 0.8000±0.1118 | 0.8000±0.0782 | 0.7898±0.0778 |
| 20  | 8.0±0.0000   | 10     | 0.8000±0.0000 | 0.7917±0.0000 | 0.7500±0.0000 | 0.8333±0.0000 | 0.7917±0.0000 |

Table 25: HM SVC baseline results of CV using base features, taking best model of grid using accuracy. Predictions from admission.

| Day | Corrects     | Totals | Accuracy      | AUC           | Sensitivity   | Specificity   | F1            |
|-----|--------------|--------|---------------|---------------|---------------|---------------|---------------|
| 1   | 175.6±1.6733 | 194    | 0.9052±0.0086 | 0.8465±0.0132 | 0.7576±0.0214 | 0.9354±0.0071 | 0.8368±0.0140 |
| 2   | 178.6±0.8944 | 194    | 0.9206±0.0046 | 0.8293±0.0091 | 0.6909±0.0254 | 0.9677±0.0092 | 0.8502±0.0062 |
| 3   | 173.0±1.0000 | 187    | 0.9251±0.0053 | 0.8422±0.0093 | 0.7200±0.0183 | 0.9643±0.0057 | 0.8555±0.0095 |
| 4   | 165.2±0.8367 | 180    | 0.9178±0.0046 | 0.8284±0.0229 | 0.6966±0.0511 | 0.9603±0.0066 | 0.8413±0.0134 |
| 5   | 145.4±1.5166 | 160    | 0.9087±0.0095 | 0.8034±0.0221 | 0.6444±0.0422 | 0.9624±0.0053 | 0.8251±0.0198 |
| 6   | 124.8±1.3038 | 142    | 0.8789±0.0092 | 0.7692±0.0056 | 0.6000±0.0000 | 0.9385±0.0111 | 0.7817±0.0117 |
| 7   | 103.6±0.8944 | 117    | 0.8855±0.0076 | 0.7809±0.0206 | 0.6087±0.0435 | 0.9532±0.0058 | 0.8031±0.0166 |
| 8   | 86.6±1.6733  | 100    | 0.8660±0.0167 | 0.7360±0.0193 | 0.5263±0.0372 | 0.9457±0.0207 | 0.7594±0.0230 |
| 9   | 68.8±1.3038  | 79     | 0.8709±0.0165 | 0.7745±0.0196 | 0.6125±0.0280 | 0.9365±0.0159 | 0.7893±0.0239 |
| 10  | 51.6±0.8944  | 62     | 0.8323±0.0144 | 0.7413±0.0223 | 0.5846±0.0421 | 0.8980±0.0144 | 0.7439±0.0217 |
| 11  | 46.0±0.0000  | 54     | 0.8519±0.0000 | 0.7619±0.0133 | 0.6000±0.0373 | 0.9238±0.0106 | 0.7745±0.0063 |
| 12  | 41.4±0.5477  | 50     | 0.8280±0.0110 | 0.7272±0.0183 | 0.5333±0.0456 | 0.9211±0.0186 | 0.7441±0.0160 |
| 13  | 36.0±1.0000  | 44     | 0.8182±0.0227 | 0.6458±0.0139 | 0.3750±0.0000 | 0.9167±0.0278 | 0.6610±0.0229 |
| 14  | 27.8±0.8367  | 37     | 0.7514±0.0226 | 0.6151±0.0144 | 0.3750±0.0000 | 0.8552±0.0289 | 0.6195±0.0193 |
| 15  | 23.0±0.7071  | 31     | 0.7419±0.0228 | 0.6411±0.0270 | 0.4571±0.0639 | 0.8250±0.0349 | 0.6377±0.0241 |
| 16  | 19.8±0.4472  | 28     | 0.7071±0.0160 | 0.5667±0.0106 | 0.2857±0.0000 | 0.8476±0.0213 | 0.5704±0.0119 |
| 17  | 18.0±0.7071  | 23     | 0.7826±0.0307 | 0.6480±0.0425 | 0.3667±0.0745 | 0.9294±0.0263 | 0.6650±0.0474 |
| 18  | 9.8±1.3038   | 16     | 0.6125±0.0815 | 0.4917±0.1079 | 0.2500±0.1768 | 0.7333±0.0697 | 0.4889±0.1120 |
| 19  | 7.6±0.5477   | 11     | 0.6909±0.0498 | 0.6821±0.0685 | 0.6500±0.1369 | 0.7143±0.0000 | 0.6736±0.0607 |
| 20  | 7.6±0.5477   | 10     | 0.7600±0.0548 | 0.7500±0.0589 | 0.7000±0.1118 | 0.8000±0.0745 | 0.7485±0.0599 |

Table 26: HM SVC baseline results of CV using base features, taking best model of grid using accuracy. Predictions from outcome.

| Day | Corrects     | Totals | Accuracy      | AUC           | Sensitivity   | Specificity   | F1            |
|-----|--------------|--------|---------------|---------------|---------------|---------------|---------------|
| 1   | 159.0±1.4142 | 194    | 0.8196±0.0073 | 0.7612±0.0194 | 0.6727±0.0395 | 0.8497±0.0052 | 0.7228±0.0136 |
| 2   | 169.2±1.9235 | 194    | 0.8722±0.0099 | 0.7592±0.0073 | 0.5879±0.0166 | 0.9304±0.0135 | 0.7670±0.0119 |
| 3   | 165.0±1.5811 | 187    | 0.8824±0.0085 | 0.8005±0.0153 | 0.6800±0.0298 | 0.9210±0.0085 | 0.7895±0.0142 |
| 4   | 161.6±1.1402 | 180    | 0.8978±0.0063 | 0.8276±0.0038 | 0.7241±0.0000 | 0.9311±0.0076 | 0.8171±0.0086 |
| 5   | 145.0±0.7071 | 160    | 0.9062±0.0044 | 0.8196±0.0085 | 0.6889±0.0203 | 0.9504±0.0067 | 0.8283±0.0069 |
| 6   | 129.8±0.8367 | 142    | 0.9141±0.0059 | 0.8535±0.0143 | 0.7600±0.0283 | 0.9470±0.0038 | 0.8523±0.0111 |
| 7   | 106.2±0.8367 | 117    | 0.9077±0.0072 | 0.8605±0.0205 | 0.7826±0.0435 | 0.9383±0.0048 | 0.8556±0.0135 |
| 8   | 84.8±1.6432  | 100    | 0.8480±0.0164 | 0.7531±0.0158 | 0.6000±0.0288 | 0.9062±0.0207 | 0.7533±0.0201 |
| 9   | 67.4±0.8944  | 79     | 0.8532±0.0113 | 0.7681±0.0071 | 0.6250±0.0000 | 0.9111±0.0142 | 0.7707±0.0127 |
| 10  | 52.6±0.8944  | 62     | 0.8484±0.0144 | 0.7741±0.0241 | 0.6462±0.0421 | 0.9020±0.0091 | 0.7725±0.0226 |
| 11  | 47.2±0.4472  | 54     | 0.8741±0.0083 | 0.8000±0.0053 | 0.6667±0.0000 | 0.9333±0.0106 | 0.8111±0.0099 |
| 12  | 42.8±1.4832  | 50     | 0.8560±0.0297 | 0.7798±0.0435 | 0.6333±0.0745 | 0.9263±0.0220 | 0.7926±0.0428 |
| 13  | 37.4±1.5166  | 44     | 0.8500±0.0345 | 0.7236±0.0604 | 0.5250±0.1046 | 0.9222±0.0232 | 0.7343±0.0627 |
| 14  | 30.8±0.8367  | 37     | 0.8324±0.0226 | 0.7211±0.0330 | 0.5250±0.0559 | 0.9172±0.0189 | 0.7354±0.0341 |
| 15  | 25.2±0.8367  | 31     | 0.8129±0.0270 | 0.6869±0.0598 | 0.4571±0.1195 | 0.9167±0.0000 | 0.7013±0.0595 |
| 16  | 21.8±0.4472  | 28     | 0.7786±0.0160 | 0.7000±0.0319 | 0.5429±0.0639 | 0.8571±0.0000 | 0.7013±0.0290 |
| 17  | 20.6±1.6733  | 23     | 0.8957±0.0728 | 0.8755±0.1240 | 0.8333±0.2357 | 0.9176±0.0322 | 0.8624±0.1037 |
| 18  | 14.2±0.4472  | 16     | 0.8875±0.0280 | 0.8417±0.0186 | 0.7500±0.0000 | 0.9333±0.0373 | 0.8484±0.0336 |
| 19  | 9.8±0.8367   | 11     | 0.8909±0.0761 | 0.9143±0.0598 | 1.0000±0.0000 | 0.8286±0.1195 | 0.8891±0.0764 |
| 20  | 8.0±0.0000   | 10     | 0.8000±0.0000 | 0.7917±0.0000 | 0.7500±0.0000 | 0.8333±0.0000 | 0.7917±0.0000 |

Table 27: HM SVC baseline results of CV using base features, taking best model of grid using F1. Predictions from admission.



| Day | Corrects     | Totals | Accuracy      | AUC           | Sensitivity   | Specificity   | F1            |
|-----|--------------|--------|---------------|---------------|---------------|---------------|---------------|
| 1   | 174.6±1.8166 | 194    | 0.9000±0.0094 | 0.8651±0.0176 | 0.8121±0.0332 | 0.9180±0.0081 | 0.8363±0.0152 |
| 2   | 177.8±0.8367 | 194    | 0.9165±0.0043 | 0.8533±0.0099 | 0.7576±0.0214 | 0.9491±0.0052 | 0.8525±0.0075 |
| 3   | 170.8±0.4472 | 187    | 0.9134±0.0024 | 0.8432±0.0065 | 0.7400±0.0149 | 0.9465±0.0035 | 0.8405±0.0043 |
| 4   | 164.6±2.0736 | 180    | 0.9144±0.0115 | 0.8571±0.0240 | 0.7724±0.0463 | 0.9417±0.0098 | 0.8463±0.0211 |
| 5   | 146.2±1.7889 | 160    | 0.9138±0.0112 | 0.8419±0.0219 | 0.7333±0.0406 | 0.9504±0.0086 | 0.8449±0.0204 |
| 6   | 125.8±1.6432 | 142    | 0.8859±0.0116 | 0.8081±0.0273 | 0.6880±0.0522 | 0.9282±0.0047 | 0.8049±0.0223 |
| 7   | 104.2±1.9235 | 117    | 0.8906±0.0164 | 0.8137±0.0173 | 0.6870±0.0194 | 0.9404±0.0161 | 0.8224±0.0231 |
| 8   | 87.2±1.9235  | 100    | 0.8720±0.0192 | 0.7719±0.0373 | 0.6105±0.0706 | 0.9333±0.0141 | 0.7828±0.0346 |
| 9   | 67.8±1.0954  | 79     | 0.8582±0.0139 | 0.7759±0.0172 | 0.6375±0.0280 | 0.9143±0.0142 | 0.7786±0.0188 |
| 10  | 49.6±0.8944  | 62     | 0.8000±0.0144 | 0.7378±0.0314 | 0.6308±0.0644 | 0.8449±0.0112 | 0.7192±0.0245 |
| 11  | 46.0±0.7071  | 54     | 0.8519±0.0131 | 0.7917±0.0157 | 0.6833±0.0373 | 0.9000±0.0199 | 0.7882±0.0153 |
| 12  | 39.4±0.8944  | 50     | 0.7880±0.0179 | 0.6895±0.0118 | 0.5000±0.0000 | 0.8789±0.0235 | 0.6973±0.0176 |
| 13  | 33.2±0.8367  | 44     | 0.7545±0.0190 | 0.5778±0.0266 | 0.3000±0.0685 | 0.8556±0.0304 | 0.5781±0.0246 |
| 14  | 26.4±1.1402  | 37     | 0.7135±0.0308 | 0.6091±0.0431 | 0.4250±0.0685 | 0.7931±0.0244 | 0.6018±0.0409 |
| 15  | 22.8±0.8367  | 31     | 0.7355±0.0270 | 0.6369±0.0304 | 0.4571±0.0639 | 0.8167±0.0373 | 0.6324±0.0285 |
| 16  | 19.2±1.3038  | 28     | 0.6857±0.0466 | 0.5524±0.0616 | 0.2857±0.1010 | 0.8190±0.0398 | 0.5538±0.0637 |
| 17  | 18.0±1.0000  | 23     | 0.7826±0.0435 | 0.7020±0.0473 | 0.5333±0.0745 | 0.8706±0.0492 | 0.7088±0.0502 |
| 18  | 10.0±1.0000  | 16     | 0.6250±0.0625 | 0.5833±0.1250 | 0.5000±0.2500 | 0.6667±0.0000 | 0.5578±0.0974 |
| 19  | 7.0±0.7071   | 11     | 0.6364±0.0643 | 0.6071±0.0884 | 0.5000±0.1768 | 0.7143±0.0000 | 0.6031±0.0857 |
| 20  | 7.8±0.4472   | 10     | 0.7800±0.0447 | 0.7667±0.0559 | 0.7000±0.1118 | 0.8333±0.0000 | 0.7674±0.0543 |

Table 28: HM SVC baseline results of CV using base features, taking best model of grid using F1. Predictions from outcome.

| Day | Corrects     | Totals | Accuracy      | AUC           | Sensitivity   | Specificity   | F1            |
|-----|--------------|--------|---------------|---------------|---------------|---------------|---------------|
| 1   | 165.8±2.0494 | 194    | 0.8546±0.0106 | 0.7871±0.0150 | 0.6848±0.0271 | 0.8894±0.0111 | 0.7631±0.0149 |
| 2   | 168.2±0.8367 | 194    | 0.8670±0.0043 | 0.7609±0.0076 | 0.6000±0.0136 | 0.9217±0.0034 | 0.7628±0.0075 |
| 3   | 165.4±1.5166 | 187    | 0.8845±0.0081 | 0.7802±0.0150 | 0.6267±0.0279 | 0.9338±0.0073 | 0.7833±0.0146 |
| 4   | 164.6±1.5166 | 180    | 0.9144±0.0084 | 0.8292±0.0220 | 0.7034±0.0463 | 0.9550±0.0086 | 0.8374±0.0174 |
| 5   | 149.4±1.5166 | 160    | 0.9337±0.0095 | 0.8362±0.0225 | 0.6889±0.0422 | 0.9835±0.0034 | 0.8694±0.0203 |
| 6   | 132.0±1.2247 | 142    | 0.9296±0.0086 | 0.8566±0.0116 | 0.7440±0.0219 | 0.9692±0.0097 | 0.8731±0.0141 |
| 7   | 107.6±1.1402 | 117    | 0.9197±0.0097 | 0.8548±0.0182 | 0.7478±0.0364 | 0.9617±0.0095 | 0.8679±0.0160 |
| 8   | 88.4±1.3416  | 100    | 0.8840±0.0134 | 0.8035±0.0106 | 0.6737±0.0235 | 0.9333±0.0187 | 0.8087±0.0158 |
| 9   | 69.0±0.7071  | 79     | 0.8734±0.0090 | 0.7994±0.0118 | 0.6750±0.0280 | 0.9238±0.0133 | 0.8022±0.0115 |
| 10  | 53.2±0.8367  | 62     | 0.8581±0.0135 | 0.7915±0.0162 | 0.6769±0.0344 | 0.9061±0.0183 | 0.7883±0.0168 |
| 11  | 49.2±0.4472  | 54     | 0.9111±0.0083 | 0.8476±0.0155 | 0.7333±0.0373 | 0.9619±0.0130 | 0.8647±0.0125 |
| 12  | 45.6±0.8944  | 50     | 0.9120±0.0179 | 0.8680±0.0336 | 0.7833±0.0745 | 0.9526±0.0220 | 0.8761±0.0267 |
| 13  | 39.6±1.6733  | 44     | 0.9000±0.0380 | 0.8125±0.0769 | 0.6750±0.1425 | 0.9500±0.0232 | 0.8236±0.0694 |
| 14  | 31.8±0.4472  | 37     | 0.8595±0.0121 | 0.7836±0.0234 | 0.6500±0.0559 | 0.9172±0.0189 | 0.7885±0.0174 |
| 15  | 25.8±0.8367  | 31     | 0.8323±0.0270 | 0.7399±0.0514 | 0.5714±0.1010 | 0.9083±0.0186 | 0.7484±0.0466 |
| 16  | 24.0±0.0000  | 28     | 0.8571±0.0000 | 0.8095±0.0000 | 0.7143±0.0000 | 0.9048±0.0000 | 0.8095±0.0000 |
| 17  | 21.4±0.5477  | 23     | 0.9304±0.0238 | 0.9206±0.0456 | 0.9000±0.0913 | 0.9412±0.0000 | 0.9109±0.0324 |
| 18  | 14.2±0.4472  | 16     | 0.8875±0.0280 | 0.8583±0.0559 | 0.8000±0.1118 | 0.9167±0.0000 | 0.8512±0.0400 |
| 19  | 9.8±0.4472   | 11     | 0.8909±0.0407 | 0.9036±0.0559 | 0.9500±0.1118 | 0.8571±0.0000 | 0.8855±0.0458 |
| 20  | 8.8±0.4472   | 10     | 0.8800±0.0447 | 0.8917±0.0559 | 0.9500±0.1118 | 0.8333±0.0000 | 0.8775±0.0480 |

Table 29: HM SVC with imputation, results of CV, taking best model of grid using accuracy. Predictions from admission.

| Day | Corrects     | Totals | Accuracy      | AUC           | Sensitivity   | Specificity   | F1            |
|-----|--------------|--------|---------------|---------------|---------------|---------------|---------------|
| 1   | 183.2±2.1679 | 194    | 0.9443±0.0112 | 0.9135±0.0116 | 0.8667±0.0166 | 0.9602±0.0121 | 0.9040±0.0180 |
| 2   | 183.0±1.5811 | 194    | 0.9433±0.0082 | 0.8960±0.0148 | 0.8242±0.0254 | 0.9677±0.0052 | 0.8988±0.0146 |
| 3   | 172.8±1.0954 | 187    | 0.9241±0.0059 | 0.8523±0.0152 | 0.7467±0.0298 | 0.9580±0.0035 | 0.8570±0.0122 |
| 4   | 167.6±1.5166 | 180    | 0.9311±0.0084 | 0.8726±0.0269 | 0.7862±0.0567 | 0.9589±0.0073 | 0.8722±0.0182 |
| 5   | 146.0±1.4142 | 160    | 0.9125±0.0088 | 0.8352±0.0274 | 0.7185±0.0620 | 0.9519±0.0126 | 0.8409±0.0175 |
| 6   | 126.0±1.0000 | 142    | 0.8873±0.0070 | 0.7995±0.0096 | 0.6640±0.0219 | 0.9350±0.0097 | 0.8034±0.0098 |
| 7   | 105.4±0.8944 | 117    | 0.9009±0.0076 | 0.8332±0.0118 | 0.7217±0.0238 | 0.9447±0.0089 | 0.8399±0.0114 |
| 8   | 88.8±0.8367  | 100    | 0.8880±0.0084 | 0.7818±0.0226 | 0.6105±0.0471 | 0.9531±0.0055 | 0.8031±0.0180 |
| 9   | 70.4±1.1402  | 79     | 0.8911±0.0144 | 0.8292±0.0279 | 0.7250±0.0559 | 0.9333±0.0133 | 0.8305±0.0242 |
| 10  | 54.0±1.2247  | 62     | 0.8710±0.0198 | 0.8053±0.0290 | 0.6923±0.0544 | 0.9184±0.0204 | 0.8054±0.0284 |
| 11  | 46.2±1.3038  | 54     | 0.8556±0.0241 | 0.7821±0.0284 | 0.6500±0.0373 | 0.9143±0.0213 | 0.7876±0.0323 |
| 12  | 41.2±0.8367  | 50     | 0.8240±0.0167 | 0.7189±0.0208 | 0.5167±0.0373 | 0.9211±0.0186 | 0.7366±0.0224 |
| 13  | 34.4±1.1402  | 44     | 0.7818±0.0259 | 0.6722±0.0158 | 0.5000±0.0000 | 0.8444±0.0317 | 0.6598±0.0242 |
| 14  | 28.6±0.5477  | 37     | 0.7730±0.0148 | 0.6741±0.0094 | 0.5000±0.0000 | 0.8483±0.0189 | 0.6712±0.0135 |
| 15  | 24.0±0.0000  | 31     | 0.7742±0.0000 | 0.6619±0.0226 | 0.4571±0.0639 | 0.8667±0.0186 | 0.6659±0.0147 |
| 16  | 19.0±1.5811  | 28     | 0.6786±0.0565 | 0.5381±0.0868 | 0.2571±0.1565 | 0.8190±0.0398 | 0.5356±0.0918 |
| 17  | 17.8±0.8367  | 23     | 0.7739±0.0364 | 0.6529±0.0424 | 0.4000±0.0913 | 0.9059±0.0526 | 0.6667±0.0457 |
| 18  | 10.2±0.4472  | 16     | 0.6375±0.0280 | 0.5917±0.0186 | 0.5000±0.0000 | 0.6833±0.0373 | 0.5736±0.0223 |
| 19  | 7.2±0.4472   | 11     | 0.6545±0.0407 | 0.6321±0.0559 | 0.5500±0.1118 | 0.7143±0.0000 | 0.6293±0.0496 |
| 20  | 8.0±0.0000   | 10     | 0.8000±0.0000 | 0.7917±0.0000 | 0.7500±0.0000 | 0.8333±0.0000 | 0.7917±0.0000 |

Table 30: HM SVC with imputation, results of CV, taking best model of grid using accuracy. Predictions from outcome.

| Day | Corrects     | Totals | Accuracy      | AUC           | Sensitivity   | Specificity   | F1            |
|-----|--------------|--------|---------------|---------------|---------------|---------------|---------------|
| 1   | 164.4±2.6077 | 194    | 0.8474±0.0134 | 0.7900±0.0337 | 0.7030±0.0657 | 0.8770±0.0068 | 0.7575±0.0251 |
| 2   | 169.4±0.5477 | 194    | 0.8732±0.0028 | 0.7839±0.0071 | 0.6485±0.0166 | 0.9193±0.0044 | 0.7791±0.0048 |
| 3   | 164.0±1.0000 | 187    | 0.8770±0.0053 | 0.7758±0.0134 | 0.6267±0.0279 | 0.9248±0.0053 | 0.7735±0.0106 |
| 4   | 161.0±1.4142 | 180    | 0.8944±0.0079 | 0.8256±0.0201 | 0.7241±0.0422 | 0.9272±0.0081 | 0.8124±0.0151 |
| 5   | 147.4±1.5166 | 160    | 0.9213±0.0095 | 0.8346±0.0197 | 0.7037±0.0370 | 0.9654±0.0067 | 0.8520±0.0182 |
| 6   | 129.4±1.5166 | 142    | 0.9113±0.0107 | 0.8424±0.0195 | 0.7360±0.0358 | 0.9487±0.0085 | 0.8456±0.0186 |
| 7   | 104.6±1.5166 | 117    | 0.8940±0.0130 | 0.8388±0.0241 | 0.7478±0.0476 | 0.9298±0.0121 | 0.8343±0.0208 |
| 8   | 86.0±1.0000  | 100    | 0.8600±0.0100 | 0.7806±0.0149 | 0.6526±0.0288 | 0.9086±0.0110 | 0.7762±0.0144 |
| 9   | 69.2±0.4472  | 79     | 0.8759±0.0057 | 0.8150±0.0152 | 0.7125±0.0342 | 0.9175±0.0071 | 0.8105±0.0103 |
| 10  | 53.4±0.5477  | 62     | 0.8613±0.0088 | 0.8105±0.0173 | 0.7231±0.0421 | 0.8980±0.0144 | 0.7984±0.0123 |
| 11  | 48.4±0.8944  | 54     | 0.8963±0.0166 | 0.8381±0.0190 | 0.7333±0.0373 | 0.9429±0.0213 | 0.8465±0.0215 |
| 12  | 43.2±0.4472  | 50     | 0.8640±0.0089 | 0.8250±0.0210 | 0.7500±0.0589 | 0.9000±0.0220 | 0.8174±0.0124 |
| 13  | 38.4±1.1402  | 44     | 0.8727±0.0259 | 0.7861±0.0681 | 0.6500±0.1369 | 0.9222±0.0124 | 0.7840±0.0516 |
| 14  | 31.0±0.0000  | 37     | 0.8378±0.0000 | 0.7517±0.0202 | 0.6000±0.0559 | 0.9034±0.0154 | 0.7558±0.0112 |
| 15  | 25.6±0.5477  | 31     | 0.8258±0.0177 | 0.7357±0.0440 | 0.5714±0.1010 | 0.9000±0.0228 | 0.7413±0.0351 |
| 16  | 24.2±0.8367  | 28     | 0.8643±0.0299 | 0.8238±0.0598 | 0.7429±0.1195 | 0.9048±0.0000 | 0.8191±0.0473 |
| 17  | 21.4±0.5477  | 23     | 0.9304±0.0238 | 0.9206±0.0456 | 0.9000±0.0913 | 0.9412±0.0000 | 0.9109±0.0324 |
| 18  | 14.2±0.4472  | 16     | 0.8875±0.0280 | 0.8583±0.0559 | 0.8000±0.1118 | 0.9167±0.0000 | 0.8512±0.0400 |
| 19  | 10.0±0.0000  | 11     | 0.9091±0.0000 | 0.9286±0.0000 | 1.0000±0.0000 | 0.8571±0.0000 | 0.9060±0.0000 |
| 20  | 9.0±0.0000   | 10     | 0.9000±0.0000 | 0.9167±0.0000 | 1.0000±0.0000 | 0.8333±0.0000 | 0.8990±0.0000 |

Table 31: HM SVC with imputation, results of CV, taking best model of grid using F1. Predictions from admission.

| Day | Corrects     | Totals | Accuracy      | AUC           | Sensitivity   | Specificity   | F1            |
|-----|--------------|--------|---------------|---------------|---------------|---------------|---------------|
| 1   | 182.4±2.3022 | 194    | 0.9402±0.0119 | 0.9182±0.0155 | 0.8848±0.0254 | 0.9516±0.0119 | 0.8991±0.0189 |
| 2   | 181.4±2.9665 | 194    | 0.9351±0.0153 | 0.8934±0.0272 | 0.8303±0.0460 | 0.9565±0.0098 | 0.8869±0.0264 |
| 3   | 172.0±0.7071 | 187    | 0.9198±0.0038 | 0.8525±0.0077 | 0.7533±0.0183 | 0.9516±0.0057 | 0.8515±0.0060 |
| 4   | 166.6±1.5166 | 180    | 0.9256±0.0084 | 0.8693±0.0256 | 0.7862±0.0567 | 0.9523±0.0109 | 0.8639±0.0170 |
| 5   | 145.2±0.8367 | 160    | 0.9075±0.0052 | 0.8263±0.0263 | 0.7037±0.0586 | 0.9489±0.0063 | 0.8317±0.0153 |
| 6   | 126.0±0.7071 | 142    | 0.8873±0.0050 | 0.8121±0.0108 | 0.6960±0.0219 | 0.9282±0.0047 | 0.8082±0.0088 |
| 7   | 103.0±0.7071 | 117    | 0.8803±0.0060 | 0.8139±0.0106 | 0.7043±0.0194 | 0.9234±0.0048 | 0.8118±0.0096 |
| 8   | 88.0±1.2247  | 100    | 0.8800±0.0122 | 0.7930±0.0155 | 0.6526±0.0288 | 0.9333±0.0141 | 0.8003±0.0177 |
| 9   | 69.4±0.5477  | 79     | 0.8785±0.0069 | 0.8212±0.0160 | 0.7250±0.0342 | 0.9175±0.0071 | 0.8152±0.0119 |
| 10  | 52.4±0.8944  | 62     | 0.8452±0.0144 | 0.7890±0.0278 | 0.6923±0.0544 | 0.8857±0.0112 | 0.7761±0.0227 |
| 11  | 45.0±1.5811  | 54     | 0.8333±0.0293 | 0.7798±0.0431 | 0.6833±0.0697 | 0.8762±0.0199 | 0.7683±0.0411 |
| 12  | 39.8±0.8367  | 50     | 0.7960±0.0167 | 0.7118±0.0258 | 0.5500±0.0456 | 0.8737±0.0118 | 0.7153±0.0250 |
| 13  | 31.2±0.8367  | 44     | 0.7091±0.0190 | 0.6083±0.0253 | 0.4500±0.0685 | 0.7667±0.0317 | 0.5851±0.0183 |
| 14  | 27.0±1.2247  | 37     | 0.7297±0.0331 | 0.6466±0.0514 | 0.5000±0.0884 | 0.7931±0.0244 | 0.6326±0.0455 |
| 15  | 21.8±0.8367  | 31     | 0.7032±0.0270 | 0.6060±0.0174 | 0.4286±0.0000 | 0.7833±0.0349 | 0.5994±0.0217 |
| 16  | 20.0±1.2247  | 28     | 0.7143±0.0437 | 0.5905±0.0516 | 0.3429±0.0782 | 0.8381±0.0426 | 0.5948±0.0541 |
| 17  | 17.8±0.4472  | 23     | 0.7739±0.0194 | 0.6853±0.0132 | 0.5000±0.0000 | 0.8706±0.0263 | 0.6934±0.0177 |
| 18  | 10.2±0.4472  | 16     | 0.6375±0.0280 | 0.5917±0.0186 | 0.5000±0.0000 | 0.6833±0.0373 | 0.5736±0.0223 |
| 19  | 7.4±0.5477   | 11     | 0.6727±0.0498 | 0.6571±0.0685 | 0.6000±0.1369 | 0.7143±0.0000 | 0.6515±0.0607 |
| 20  | 7.6±0.5477   | 10     | 0.7600±0.0548 | 0.7583±0.0456 | 0.7500±0.0000 | 0.7667±0.0913 | 0.7538±0.0519 |

Table 32: HM SVC with imputation, results of CV, taking best model of grid using F1. Predictions from outcome.

| Day | Corrects     | Totals | Accuracy      | AUC           | Sensitivity   | Specificity   | F1            |
|-----|--------------|--------|---------------|---------------|---------------|---------------|---------------|
| 1   | 162.6±0.8944 | 194    | 0.8381±0.0046 | 0.7700±0.0108 | 0.6667±0.0214 | 0.8733±0.0034 | 0.7415±0.0083 |
| 2   | 166.8±1.3038 | 194    | 0.8598±0.0067 | 0.7806±0.0123 | 0.6606±0.0254 | 0.9006±0.0076 | 0.7650±0.0104 |
| 3   | 167.0±1.5811 | 187    | 0.8930±0.0085 | 0.8204±0.0235 | 0.7133±0.0506 | 0.9274±0.0097 | 0.8084±0.0163 |
| 4   | 162.6±0.5477 | 180    | 0.9033±0.0030 | 0.8560±0.0057 | 0.7862±0.0154 | 0.9258±0.0055 | 0.8326±0.0038 |
| 5   | 146.0±1.0000 | 160    | 0.9125±0.0062 | 0.8441±0.0098 | 0.7407±0.0262 | 0.9474±0.0106 | 0.8441±0.0082 |
| 6   | 129.0±0.7071 | 142    | 0.9085±0.0050 | 0.8501±0.0030 | 0.7600±0.0000 | 0.9402±0.0060 | 0.8447±0.0068 |
| 7   | 104.2±1.3038 | 117    | 0.8906±0.0111 | 0.8432±0.0252 | 0.7652±0.0496 | 0.9213±0.0058 | 0.8320±0.0193 |
| 8   | 86.6±1.1402  | 100    | 0.8660±0.0114 | 0.8327±0.0223 | 0.7789±0.0440 | 0.8864±0.0103 | 0.8014±0.0174 |
| 9   | 69.4±0.5477  | 79     | 0.8785±0.0069 | 0.8306±0.0196 | 0.7500±0.0442 | 0.9111±0.0087 | 0.8184±0.0125 |
| 10  | 54.4±1.8166  | 62     | 0.8774±0.0293 | 0.8546±0.0552 | 0.8154±0.1032 | 0.8939±0.0171 | 0.8275±0.0437 |
| 11  | 48.8±1.0954  | 54     | 0.9037±0.0203 | 0.8488±0.0311 | 0.7500±0.0589 | 0.9476±0.0199 | 0.8572±0.0299 |
| 12  | 45.0±1.5811  | 50     | 0.9000±0.0316 | 0.8658±0.0583 | 0.8000±0.1118 | 0.9316±0.0144 | 0.8626±0.0469 |
| 13  | 38.4±0.8944  | 44     | 0.8727±0.0203 | 0.7861±0.0518 | 0.6500±0.1046 | 0.9222±0.0124 | 0.7848±0.0416 |
| 14  | 32.4±1.3416  | 37     | 0.8757±0.0363 | 0.8664±0.0607 | 0.8500±0.1046 | 0.8828±0.0189 | 0.8319±0.0504 |
| 15  | 27.6±0.5477  | 31     | 0.8903±0.0177 | 0.8583±0.0391 | 0.8000±0.0782 | 0.9167±0.0000 | 0.8470±0.0288 |
| 16  | 25.2±0.4472  | 28     | 0.9000±0.0160 | 0.8952±0.0319 | 0.8857±0.0639 | 0.9048±0.0000 | 0.8732±0.0220 |
| 17  | 21.8±0.4472  | 23     | 0.9478±0.0194 | 0.9539±0.0373 | 0.9667±0.0745 | 0.9412±0.0000 | 0.9346±0.0264 |
| 18  | 14.0±1.0000  | 16     | 0.8750±0.0625 | 0.8333±0.1250 | 0.7500±0.2500 | 0.9167±0.0000 | 0.8260±0.0986 |
| 19  | 10.4±0.5477  | 11     | 0.9455±0.0498 | 0.9571±0.0391 | 1.0000±0.0000 | 0.9143±0.0782 | 0.9436±0.0515 |
| 20  | 9.0±0.0000   | 10     | 0.9000±0.0000 | 0.9167±0.0000 | 1.0000±0.0000 | 0.8333±0.0000 | 0.8990±0.0000 |

Table 33: HM SVC with imputation, with missing flags, results of CV, taking best model of grid using accuracy. Predictions from admission.

| Day | Corrects     | Totals | Accuracy      | AUC           | Sensitivity   | Specificity   | F1            |
|-----|--------------|--------|---------------|---------------|---------------|---------------|---------------|
| 1   | 182.6±1.8166 | 194    | 0.9412±0.0094 | 0.9333±0.0121 | 0.9212±0.0166 | 0.9453±0.0081 | 0.9031±0.0147 |
| 2   | 182.4±1.3416 | 194    | 0.9402±0.0069 | 0.9086±0.0091 | 0.8606±0.0166 | 0.9565±0.0076 | 0.8971±0.0109 |
| 3   | 174.2±0.4472 | 187    | 0.9316±0.0024 | 0.8783±0.0143 | 0.8000±0.0333 | 0.9567±0.0053 | 0.8742±0.0062 |
| 4   | 166.6±0.8944 | 180    | 0.9256±0.0050 | 0.8860±0.0030 | 0.8276±0.0000 | 0.9444±0.0059 | 0.8685±0.0073 |
| 5   | 144.0±2.1213 | 160    | 0.9000±0.0133 | 0.8483±0.0234 | 0.7704±0.0406 | 0.9263±0.0098 | 0.8306±0.0222 |
| 6   | 127.4±1.8166 | 142    | 0.8972±0.0128 | 0.8464±0.0304 | 0.7680±0.0593 | 0.9248±0.0072 | 0.8304±0.0235 |
| 7   | 103.6±1.8166 | 117    | 0.8855±0.0155 | 0.8171±0.0338 | 0.7043±0.0645 | 0.9298±0.0058 | 0.8177±0.0281 |
| 8   | 88.8±1.3038  | 100    | 0.8880±0.0130 | 0.8100±0.0213 | 0.6842±0.0372 | 0.9358±0.0103 | 0.8151±0.0212 |
| 9   | 70.2±2.2804  | 79     | 0.8886±0.0289 | 0.8462±0.0428 | 0.7750±0.0713 | 0.9175±0.0235 | 0.8338±0.0424 |
| 10  | 51.0±1.2247  | 62     | 0.8226±0.0198 | 0.7691±0.0428 | 0.6769±0.0843 | 0.8612±0.0091 | 0.7493±0.0340 |
| 11  | 45.8±1.6432  | 54     | 0.8481±0.0304 | 0.8131±0.0483 | 0.7500±0.0833 | 0.8762±0.0199 | 0.7931±0.0427 |
| 12  | 39.2±1.9235  | 50     | 0.7840±0.0385 | 0.7096±0.0447 | 0.5667±0.0697 | 0.8526±0.0399 | 0.7075±0.0466 |
| 13  | 33.2±0.8367  | 44     | 0.7545±0.0190 | 0.6653±0.0296 | 0.5250±0.0559 | 0.8056±0.0196 | 0.6401±0.0246 |
| 14  | 26.8±1.7889  | 37     | 0.7243±0.0483 | 0.6884±0.0704 | 0.6250±0.1250 | 0.7517±0.0450 | 0.6523±0.0590 |
| 15  | 22.2±0.8367  | 31     | 0.7161±0.0270 | 0.6345±0.0438 | 0.4857±0.0782 | 0.7833±0.0186 | 0.6227±0.0383 |
| 16  | 20.4±2.3022  | 28     | 0.7286±0.0822 | 0.6857±0.1134 | 0.6000±0.1863 | 0.7714±0.0621 | 0.6666±0.1010 |
| 17  | 17.4±0.5477  | 23     | 0.7565±0.0238 | 0.7059±0.0312 | 0.6000±0.0913 | 0.8118±0.0492 | 0.6958±0.0251 |
| 18  | 9.6±0.5477   | 16     | 0.6000±0.0342 | 0.5667±0.0228 | 0.5000±0.0000 | 0.6333±0.0456 | 0.5442±0.0266 |
| 19  | 7.8±0.4472   | 11     | 0.7091±0.0407 | 0.7071±0.0559 | 0.7000±0.1118 | 0.7143±0.0000 | 0.6958±0.0496 |
| 20  | 8.0±0.0000   | 10     | 0.8000±0.0000 | 0.7917±0.0000 | 0.7500±0.0000 | 0.8333±0.0000 | 0.7917±0.0000 |

Table 34: HM SVC with imputation, with missing flags, results of CV, taking best model of grid using accuracy. Predictions from outcome.

| Day | Corrects     | Totals | Accuracy      | AUC           | Sensitivity   | Specificity   | F1            |
|-----|--------------|--------|---------------|---------------|---------------|---------------|---------------|
| 1   | 164.2±1.9235 | 194    | 0.8464±0.0099 | 0.7918±0.0148 | 0.7091±0.0271 | 0.8745±0.0102 | 0.7577±0.0139 |
| 2   | 167.2±0.4472 | 194    | 0.8619±0.0023 | 0.7867±0.0109 | 0.6727±0.0254 | 0.9006±0.0044 | 0.7694±0.0061 |
| 3   | 167.4±0.8944 | 187    | 0.8952±0.0048 | 0.8351±0.0094 | 0.7467±0.0183 | 0.9236±0.0045 | 0.8162±0.0081 |
| 4   | 163.0±0.7071 | 180    | 0.9056±0.0039 | 0.8601±0.0112 | 0.7931±0.0244 | 0.9272±0.0047 | 0.8364±0.0072 |
| 5   | 146.4±1.1402 | 160    | 0.9150±0.0071 | 0.8544±0.0208 | 0.7630±0.0422 | 0.9459±0.0034 | 0.8501±0.0148 |
| 6   | 128.0±1.0000 | 142    | 0.9014±0.0070 | 0.8458±0.0043 | 0.7600±0.0000 | 0.9316±0.0085 | 0.8353±0.0093 |
| 7   | 104.4±0.8944 | 117    | 0.8923±0.0076 | 0.8542±0.0180 | 0.7913±0.0364 | 0.9170±0.0048 | 0.8373±0.0131 |
| 8   | 87.0±1.5811  | 100    | 0.8700±0.0158 | 0.8432±0.0238 | 0.8000±0.0440 | 0.8864±0.0161 | 0.8088±0.0219 |
| 9   | 70.0±0.7071  | 79     | 0.8861±0.0090 | 0.8493±0.0255 | 0.7875±0.0559 | 0.9111±0.0087 | 0.8318±0.0158 |
| 10  | 55.6±1.1402  | 62     | 0.8968±0.0184 | 0.8951±0.0422 | 0.8923±0.0877 | 0.8980±0.0144 | 0.8574±0.0282 |
| 11  | 49.4±1.1402  | 54     | 0.9148±0.0211 | 0.8798±0.0247 | 0.8167±0.0373 | 0.9429±0.0213 | 0.8778±0.0291 |
| 12  | 45.4±1.5166  | 50     | 0.9080±0.0303 | 0.8882±0.0511 | 0.8500±0.0913 | 0.9263±0.0118 | 0.8767±0.0421 |
| 13  | 39.2±1.3038  | 44     | 0.8909±0.0296 | 0.8264±0.0583 | 0.7250±0.1046 | 0.9278±0.0152 | 0.8195±0.0514 |
| 14  | 32.8±0.8367  | 37     | 0.8865±0.0226 | 0.8823±0.0449 | 0.8750±0.0884 | 0.8897±0.0154 | 0.8464±0.0327 |
| 15  | 27.6±0.5477  | 31     | 0.8903±0.0177 | 0.8583±0.0391 | 0.8000±0.0782 | 0.9167±0.0000 | 0.8470±0.0288 |
| 16  | 25.0±0.7071  | 28     | 0.8929±0.0253 | 0.8810±0.0505 | 0.8571±0.1010 | 0.9048±0.0000 | 0.8625±0.0364 |
| 17  | 21.8±0.4472  | 23     | 0.9478±0.0194 | 0.9539±0.0373 | 0.9667±0.0745 | 0.9412±0.0000 | 0.9346±0.0264 |
| 18  | 14.4±0.5477  | 16     | 0.9000±0.0342 | 0.8833±0.0685 | 0.8500±0.1369 | 0.9167±0.0000 | 0.8691±0.0490 |
| 19  | 10.2±0.4472  | 11     | 0.9273±0.0407 | 0.9429±0.0319 | 1.0000±0.0000 | 0.8857±0.0639 | 0.9248±0.0420 |
| 20  | 9.0±0.0000   | 10     | 0.9000±0.0000 | 0.9167±0.0000 | 1.0000±0.0000 | 0.8333±0.0000 | 0.8990±0.0000 |

Table 35: HM SVC with imputation, with missing flags, results of CV, taking best model of grid using F1. Predictions from admission.

| Day | Corrects     | Totals | Accuracy      | AUC           | Sensitivity   | Specificity   | F1            |
|-----|--------------|--------|---------------|---------------|---------------|---------------|---------------|
| 1   | 183.4±1.6733 | 194    | 0.9454±0.0086 | 0.9430±0.0132 | 0.9394±0.0214 | 0.9466±0.0071 | 0.9102±0.0137 |
| 2   | 182.2±0.8367 | 194    | 0.9392±0.0043 | 0.9079±0.0078 | 0.8606±0.0166 | 0.9553±0.0052 | 0.8955±0.0069 |
| 3   | 173.4±0.5477 | 187    | 0.9273±0.0029 | 0.8812±0.0079 | 0.8133±0.0183 | 0.9490±0.0045 | 0.8692±0.0050 |
| 4   | 166.4±1.1402 | 180    | 0.9244±0.0063 | 0.8881±0.0082 | 0.8345±0.0154 | 0.9417±0.0073 | 0.8676±0.0098 |
| 5   | 144.0±1.4142 | 160    | 0.9000±0.0088 | 0.8513±0.0196 | 0.7778±0.0370 | 0.9248±0.0053 | 0.8314±0.0159 |
| 6   | 128.2±0.4472 | 142    | 0.9028±0.0031 | 0.8655±0.0143 | 0.8080±0.0335 | 0.9231±0.0060 | 0.8426±0.0069 |
| 7   | 104.6±0.5477 | 117    | 0.8940±0.0047 | 0.8519±0.0029 | 0.7826±0.0000 | 0.9213±0.0058 | 0.8385±0.0058 |
| 8   | 89.0±1.7321  | 100    | 0.8900±0.0173 | 0.8274±0.0322 | 0.7263±0.0577 | 0.9284±0.0103 | 0.8233±0.0292 |
| 9   | 70.2±1.3038  | 79     | 0.8886±0.0165 | 0.8556±0.0296 | 0.8000±0.0523 | 0.9111±0.0087 | 0.8363±0.0253 |
| 10  | 51.6±1.3416  | 62     | 0.8323±0.0216 | 0.7978±0.0273 | 0.7385±0.0421 | 0.8571±0.0204 | 0.7694±0.0274 |
| 11  | 45.8±1.0954  | 54     | 0.8481±0.0203 | 0.8131±0.0420 | 0.7500±0.0833 | 0.8762±0.0106 | 0.7927±0.0318 |
| 12  | 39.6±1.6733  | 50     | 0.7920±0.0335 | 0.7320±0.0531 | 0.6167±0.0950 | 0.8474±0.0220 | 0.7235±0.0474 |
| 13  | 34.2±0.8367  | 44     | 0.7773±0.0190 | 0.7083±0.0503 | 0.6000±0.1046 | 0.8167±0.0152 | 0.6749±0.0352 |
| 14  | 27.2±1.6432  | 37     | 0.7351±0.0444 | 0.7134±0.0680 | 0.6750±0.1118 | 0.7517±0.0289 | 0.6702±0.0567 |
| 15  | 22.2±0.8367  | 31     | 0.7161±0.0270 | 0.6446±0.0425 | 0.5143±0.0782 | 0.7750±0.0228 | 0.6289±0.0370 |
| 16  | 22.0±1.0000  | 28     | 0.7857±0.0357 | 0.7429±0.0593 | 0.6571±0.1278 | 0.8286±0.0426 | 0.7272±0.0519 |
| 17  | 17.8±0.4472  | 23     | 0.7739±0.0194 | 0.7176±0.0270 | 0.6000±0.0913 | 0.8353±0.0492 | 0.7117±0.0189 |
| 18  | 10.4±0.5477  | 16     | 0.6500±0.0342 | 0.6167±0.0543 | 0.5500±0.1118 | 0.6833±0.0373 | 0.5916±0.0409 |
| 19  | 7.8±0.4472   | 11     | 0.7091±0.0407 | 0.7071±0.0559 | 0.7000±0.1118 | 0.7143±0.0000 | 0.6958±0.0496 |
| 20  | 8.0±0.0000   | 10     | 0.8000±0.0000 | 0.7917±0.0000 | 0.7500±0.0000 | 0.8333±0.0000 | 0.7917±0.0000 |

Table 36: HM SVC with imputation, with missing flags, results of CV, taking best model of grid using F1. Predictions from outcome.

| Day | Corrects     | Totals | Accuracy      | AUC           | Sensitivity   | Specificity   | F1            |
|-----|--------------|--------|---------------|---------------|---------------|---------------|---------------|
| 1   | 163.8±3.2711 | 194    | 0.8443±0.0169 | 0.7978±0.0245 | 0.7273±0.0371 | 0.8683±0.0135 | 0.7583±0.0240 |
| 2   | 167.6±1.1402 | 194    | 0.8639±0.0059 | 0.7686±0.0130 | 0.6242±0.0271 | 0.9130±0.0062 | 0.7635±0.0105 |
| 3   | 163.8±0.4472 | 187    | 0.8759±0.0024 | 0.7724±0.0069 | 0.6200±0.0183 | 0.9248±0.0053 | 0.7709±0.0035 |
| 4   | 160.4±1.6733 | 180    | 0.8911±0.0093 | 0.8014±0.0161 | 0.6690±0.0308 | 0.9338±0.0094 | 0.7997±0.0158 |
| 5   | 147.0±1.2247 | 160    | 0.9187±0.0077 | 0.8508±0.0160 | 0.7481±0.0310 | 0.9534±0.0063 | 0.8539±0.0141 |
| 6   | 127.2±2.1679 | 142    | 0.8958±0.0153 | 0.8298±0.0289 | 0.7280±0.0522 | 0.9316±0.0105 | 0.8236±0.0261 |
| 7   | 102.2±1.9235 | 117    | 0.8735±0.0164 | 0.8195±0.0129 | 0.7304±0.0194 | 0.9085±0.0207 | 0.8076±0.0193 |
| 8   | 86.4±0.5477  | 100    | 0.8640±0.0055 | 0.8194±0.0114 | 0.7474±0.0235 | 0.8914±0.0055 | 0.7950±0.0086 |
| 9   | 67.4±0.5477  | 79     | 0.8532±0.0069 | 0.7774±0.0171 | 0.6500±0.0342 | 0.9048±0.0000 | 0.7747±0.0134 |
| 10  | 52.6±1.1402  | 62     | 0.8484±0.0184 | 0.7797±0.0263 | 0.6615±0.0421 | 0.8980±0.0144 | 0.7751±0.0264 |
| 11  | 49.2±0.4472  | 54     | 0.9111±0.0083 | 0.8595±0.0186 | 0.7667±0.0373 | 0.9524±0.0000 | 0.8681±0.0138 |
| 12  | 43.8±0.4472  | 50     | 0.8760±0.0089 | 0.8272±0.0126 | 0.7333±0.0373 | 0.9211±0.0186 | 0.8290±0.0098 |
| 13  | 39.0±0.7071  | 44     | 0.8864±0.0161 | 0.8042±0.0338 | 0.6750±0.0685 | 0.9333±0.0152 | 0.8068±0.0281 |
| 14  | 32.4±0.5477  | 37     | 0.8757±0.0148 | 0.7759±0.0256 | 0.6000±0.0559 | 0.9517±0.0189 | 0.7992±0.0245 |
| 15  | 26.4±0.5477  | 31     | 0.8516±0.0177 | 0.7827±0.0363 | 0.6571±0.0782 | 0.9083±0.0186 | 0.7849±0.0295 |
| 16  | 22.8±0.4472  | 28     | 0.8143±0.0160 | 0.7333±0.0106 | 0.5714±0.0000 | 0.8952±0.0213 | 0.7425±0.0158 |
| 17  | 20.8±0.4472  | 23     | 0.9043±0.0194 | 0.8167±0.0373 | 0.6333±0.0745 | 1.0000±0.0000 | 0.8563±0.0355 |
| 18  | 13.0±0.7071  | 16     | 0.8125±0.0442 | 0.7083±0.0884 | 0.5000±0.1768 | 0.9167±0.0000 | 0.7200±0.0865 |
| 19  | 10.2±0.8367  | 11     | 0.9273±0.0761 | 0.9321±0.0803 | 0.9500±0.1118 | 0.9143±0.0782 | 0.9231±0.0817 |
| 20  | 8.0±0.7071   | 10     | 0.8000±0.0707 | 0.7917±0.0884 | 0.7500±0.1768 | 0.8333±0.0000 | 0.7889±0.0809 |

Table 37: HM SVC with imputation, with missing flags, applying reference values, results of CV, taking best model of grid using accuracy. Predictions from admission.

| Day | Corrects     | Totals | Accuracy      | AUC           | Sensitivity   | Specificity   | F1            |
|-----|--------------|--------|---------------|---------------|---------------|---------------|---------------|
| 1   | 181.8±1.6432 | 194    | 0.9371±0.0085 | 0.9163±0.0206 | 0.8848±0.0395 | 0.9478±0.0034 | 0.8943±0.0154 |
| 2   | 181.8±2.1679 | 194    | 0.9371±0.0112 | 0.8971±0.0199 | 0.8364±0.0346 | 0.9578±0.0081 | 0.8905±0.0193 |
| 3   | 170.2±0.4472 | 187    | 0.9102±0.0024 | 0.8413±0.0112 | 0.7400±0.0279 | 0.9427±0.0064 | 0.8358±0.0047 |
| 4   | 165.0±1.7321 | 180    | 0.9167±0.0096 | 0.8389±0.0185 | 0.7241±0.0345 | 0.9536±0.0081 | 0.8437±0.0179 |
| 5   | 143.6±2.0736 | 160    | 0.8975±0.0130 | 0.8262±0.0243 | 0.7185±0.0422 | 0.9338±0.0082 | 0.8204±0.0230 |
| 6   | 121.8±1.3038 | 142    | 0.8577±0.0092 | 0.7533±0.0182 | 0.5920±0.0335 | 0.9145±0.0060 | 0.7540±0.0167 |
| 7   | 102.6±1.5166 | 117    | 0.8769±0.0130 | 0.7756±0.0278 | 0.6087±0.0532 | 0.9426±0.0058 | 0.7923±0.0247 |
| 8   | 86.2±1.6432  | 100    | 0.8620±0.0164 | 0.7698±0.0421 | 0.6211±0.0865 | 0.9185±0.0110 | 0.7721±0.0331 |
| 9   | 67.2±1.6432  | 79     | 0.8506±0.0208 | 0.7805±0.0215 | 0.6625±0.0342 | 0.8984±0.0241 | 0.7744±0.0266 |
| 10  | 49.8±1.3038  | 62     | 0.8032±0.0210 | 0.7625±0.0412 | 0.6923±0.0769 | 0.8327±0.0091 | 0.7325±0.0323 |
| 11  | 44.6±0.8944  | 54     | 0.8259±0.0166 | 0.7393±0.0106 | 0.5833±0.0000 | 0.8952±0.0213 | 0.7439±0.0176 |
| 12  | 38.2±0.4472  | 50     | 0.7640±0.0089 | 0.6908±0.0188 | 0.5500±0.0456 | 0.8316±0.0144 | 0.6850±0.0148 |
| 13  | 35.2±1.3038  | 44     | 0.8000±0.0296 | 0.6931±0.0375 | 0.5250±0.0559 | 0.8611±0.0278 | 0.6826±0.0392 |
| 14  | 30.2±0.4472  | 37     | 0.8162±0.0121 | 0.7289±0.0431 | 0.5750±0.1118 | 0.8828±0.0308 | 0.7265±0.0321 |
| 15  | 23.2±0.8367  | 31     | 0.7484±0.0270 | 0.6351±0.0174 | 0.4286±0.0000 | 0.8417±0.0349 | 0.6370±0.0231 |
| 16  | 22.6±1.1402  | 28     | 0.8071±0.0407 | 0.7571±0.0391 | 0.6571±0.0782 | 0.8571±0.0583 | 0.7500±0.0430 |
| 17  | 16.4±0.5477  | 23     | 0.7130±0.0238 | 0.6441±0.0161 | 0.5000±0.0000 | 0.7882±0.0322 | 0.6395±0.0203 |
| 18  | 7.8±0.8367   | 16     | 0.4875±0.0523 | 0.4417±0.0757 | 0.3500±0.1369 | 0.5333±0.0456 | 0.4306±0.0601 |
| 19  | 7.6±0.5477   | 11     | 0.6909±0.0498 | 0.6821±0.0685 | 0.6500±0.1369 | 0.7143±0.0000 | 0.6736±0.0607 |
| 20  | 8.2±0.8367   | 10     | 0.8200±0.0837 | 0.8417±0.0854 | 0.9500±0.1118 | 0.7333±0.0913 | 0.8190±0.0843 |

Table 38: HM SVC with imputation, with missing flags, applying reference values, results of CV, taking best model of grid using accuracy. Predictions from outcome.

| Day | Corrects     | Totals | Accuracy      | AUC           | Sensitivity   | Specificity   | F1            |
|-----|--------------|--------|---------------|---------------|---------------|---------------|---------------|
| 1   | 164.8±2.7749 | 194    | 0.8495±0.0143 | 0.8202±0.0143 | 0.7758±0.0166 | 0.8646±0.0148 | 0.7712±0.0177 |
| 2   | 166.6±2.0736 | 194    | 0.8588±0.0107 | 0.7631±0.0163 | 0.6182±0.0271 | 0.9081±0.0092 | 0.7563±0.0169 |
| 3   | 163.4±1.3416 | 187    | 0.8738±0.0072 | 0.7711±0.0142 | 0.6200±0.0298 | 0.9223±0.0083 | 0.7682±0.0121 |
| 4   | 160.4±0.5477 | 180    | 0.8911±0.0030 | 0.8097±0.0088 | 0.6897±0.0244 | 0.9298±0.0076 | 0.8029±0.0033 |
| 5   | 147.6±1.3416 | 160    | 0.9225±0.0084 | 0.8707±0.0273 | 0.7926±0.0562 | 0.9489±0.0034 | 0.8639±0.0173 |
| 6   | 127.0±1.8708 | 142    | 0.8944±0.0132 | 0.8321±0.0249 | 0.7360±0.0456 | 0.9282±0.0097 | 0.8228±0.0222 |
| 7   | 102.2±2.1679 | 117    | 0.8735±0.0185 | 0.8293±0.0244 | 0.7565±0.0389 | 0.9021±0.0175 | 0.8108±0.0251 |
| 8   | 87.0±1.2247  | 100    | 0.8700±0.0122 | 0.8311±0.0174 | 0.7684±0.0288 | 0.8938±0.0110 | 0.8048±0.0174 |
| 9   | 67.4±0.5477  | 79     | 0.8532±0.0069 | 0.7774±0.0171 | 0.6500±0.0342 | 0.9048±0.0000 | 0.7747±0.0134 |
| 10  | 53.0±0.7071  | 62     | 0.8548±0.0114 | 0.8008±0.0300 | 0.7077±0.0644 | 0.8939±0.0091 | 0.7887±0.0214 |
| 11  | 48.4±0.5477  | 54     | 0.8963±0.0101 | 0.8440±0.0257 | 0.7500±0.0589 | 0.9381±0.0130 | 0.8478±0.0173 |
| 12  | 43.6±0.5477  | 50     | 0.8720±0.0110 | 0.8246±0.0181 | 0.7333±0.0373 | 0.9158±0.0118 | 0.8245±0.0156 |
| 13  | 39.0±0.7071  | 44     | 0.8864±0.0161 | 0.8236±0.0301 | 0.7250±0.0559 | 0.9222±0.0124 | 0.8142±0.0274 |
| 14  | 32.6±0.5477  | 37     | 0.8811±0.0148 | 0.7884±0.0094 | 0.6250±0.0000 | 0.9517±0.0189 | 0.8107±0.0180 |
| 15  | 26.6±0.5477  | 31     | 0.8581±0.0177 | 0.7970±0.0310 | 0.6857±0.0639 | 0.9083±0.0186 | 0.7966±0.0271 |
| 16  | 22.8±0.4472  | 28     | 0.8143±0.0160 | 0.7333±0.0106 | 0.5714±0.0000 | 0.8952±0.0213 | 0.7425±0.0158 |
| 17  | 21.0±0.0000  | 23     | 0.9130±0.0000 | 0.8333±0.0000 | 0.6667±0.0000 | 1.0000±0.0000 | 0.8722±0.0000 |
| 18  | 13.0±0.7071  | 16     | 0.8125±0.0442 | 0.7083±0.0884 | 0.5000±0.1768 | 0.9167±0.0000 | 0.7200±0.0865 |
| 19  | 10.2±0.8367  | 11     | 0.9273±0.0761 | 0.9321±0.0803 | 0.9500±0.1118 | 0.9143±0.0782 | 0.9231±0.0817 |
| 20  | 8.0±0.7071   | 10     | 0.8000±0.0707 | 0.7917±0.0884 | 0.7500±0.1768 | 0.8333±0.0000 | 0.7889±0.0809 |

Table 39: HM SVC with imputation, with missing flags, applying reference values, results of CV, taking best model of grid using F1. Predictions from admission.

| Day | Corrects     | Totals | Accuracy      | AUC           | Sensitivity   | Specificity   | F1            |
|-----|--------------|--------|---------------|---------------|---------------|---------------|---------------|
| 1   | 181.2±1.4832 | 194    | 0.9340±0.0076 | 0.9121±0.0192 | 0.8788±0.0371 | 0.9453±0.0028 | 0.8893±0.0140 |
| 2   | 181.4±1.3416 | 194    | 0.9351±0.0069 | 0.8982±0.0142 | 0.8424±0.0254 | 0.9540±0.0034 | 0.8879±0.0123 |
| 3   | 169.6±1.1402 | 187    | 0.9070±0.0061 | 0.8421±0.0148 | 0.7467±0.0298 | 0.9376±0.0053 | 0.8322±0.0116 |
| 4   | 165.6±1.5166 | 180    | 0.9200±0.0084 | 0.8520±0.0163 | 0.7517±0.0289 | 0.9523±0.0055 | 0.8520±0.0157 |
| 5   | 143.4±1.8166 | 160    | 0.8962±0.0114 | 0.8254±0.0142 | 0.7185±0.0203 | 0.9323±0.0106 | 0.8190±0.0175 |
| 6   | 122.6±1.5166 | 142    | 0.8634±0.0107 | 0.7787±0.0315 | 0.6480±0.0657 | 0.9094±0.0076 | 0.7705±0.0223 |
| 7   | 102.8±1.3038 | 117    | 0.8786±0.0111 | 0.7833±0.0252 | 0.6261±0.0496 | 0.9404±0.0058 | 0.7974±0.0216 |
| 8   | 86.8±1.3038  | 100    | 0.8680±0.0130 | 0.7977±0.0353 | 0.6842±0.0744 | 0.9111±0.0103 | 0.7899±0.0255 |
| 9   | 67.2±0.4472  | 79     | 0.8506±0.0057 | 0.7898±0.0169 | 0.6875±0.0442 | 0.8921±0.0133 | 0.7777±0.0094 |
| 10  | 49.6±1.3416  | 62     | 0.8000±0.0216 | 0.7661±0.0372 | 0.7077±0.0644 | 0.8245±0.0112 | 0.7320±0.0309 |
| 11  | 45.0±1.0000  | 54     | 0.8333±0.0185 | 0.7500±0.0179 | 0.6000±0.0373 | 0.9000±0.0261 | 0.7547±0.0207 |
| 12  | 38.8±1.0954  | 50     | 0.7760±0.0219 | 0.7158±0.0371 | 0.6000±0.0697 | 0.8316±0.0144 | 0.7055±0.0324 |
| 13  | 35.2±1.3038  | 44     | 0.8000±0.0296 | 0.6931±0.0375 | 0.5250±0.0559 | 0.8611±0.0278 | 0.6826±0.0392 |
| 14  | 30.6±0.8944  | 37     | 0.8270±0.0242 | 0.7539±0.0406 | 0.6250±0.0884 | 0.8828±0.0308 | 0.7486±0.0338 |
| 15  | 23.0±0.7071  | 31     | 0.7419±0.0228 | 0.6310±0.0147 | 0.4286±0.0000 | 0.8333±0.0295 | 0.6313±0.0195 |
| 16  | 22.2±0.8367  | 28     | 0.7929±0.0299 | 0.7571±0.0310 | 0.6857±0.0639 | 0.8286±0.0426 | 0.7402±0.0317 |
| 17  | 16.2±0.4472  | 23     | 0.7043±0.0194 | 0.6382±0.0132 | 0.5000±0.0000 | 0.7765±0.0263 | 0.6321±0.0166 |
| 18  | 7.8±0.8367   | 16     | 0.4875±0.0523 | 0.4417±0.0757 | 0.3500±0.1369 | 0.5333±0.0456 | 0.4306±0.0601 |
| 19  | 7.4±0.5477   | 11     | 0.6727±0.0498 | 0.6571±0.0685 | 0.6000±0.1369 | 0.7143±0.0000 | 0.6515±0.0607 |
| 20  | 8.2±0.8367   | 10     | 0.8200±0.0837 | 0.8417±0.0854 | 0.9500±0.1118 | 0.7333±0.0913 | 0.8190±0.0843 |

Table 40: HM SVC with imputation, with missing flags, applying reference values, results of CV, taking best model of grid using F1. Predictions from outcome.

| Day | Corrects     | Totals | Accuracy      | AUC           | Sensitivity   | Specificity   | F1            |
|-----|--------------|--------|---------------|---------------|---------------|---------------|---------------|
| 1   | 165.6±2.7019 | 194    | 0.8536±0.0139 | 0.7769±0.0390 | 0.6606±0.0784 | 0.8932±0.0068 | 0.7572±0.0292 |
| 2   | 168.4±2.9665 | 194    | 0.8680±0.0153 | 0.7519±0.0152 | 0.5758±0.0214 | 0.9280±0.0168 | 0.7596±0.0211 |
| 3   | 165.0±1.5811 | 187    | 0.8824±0.0085 | 0.7466±0.0198 | 0.5467±0.0380 | 0.9465±0.0057 | 0.7647±0.0185 |
| 4   | 161.2±1.6432 | 180    | 0.8956±0.0091 | 0.7789±0.0129 | 0.6069±0.0189 | 0.9510±0.0076 | 0.7953±0.0160 |
| 5   | 147.0±1.0000 | 160    | 0.9187±0.0063 | 0.8183±0.0123 | 0.6667±0.0262 | 0.9699±0.0075 | 0.8434±0.0114 |
| 6   | 129.0±1.0000 | 142    | 0.9085±0.0070 | 0.8186±0.0191 | 0.6800±0.0400 | 0.9573±0.0060 | 0.8341±0.0147 |
| 7   | 104.6±1.6733 | 117    | 0.8940±0.0143 | 0.8093±0.0168 | 0.6696±0.0238 | 0.9489±0.0139 | 0.8242±0.0213 |
| 8   | 86.4±1.5166  | 100    | 0.8640±0.0152 | 0.7670±0.0196 | 0.6105±0.0288 | 0.9235±0.0135 | 0.7737±0.0224 |
| 9   | 68.4±0.5477  | 79     | 0.8658±0.0069 | 0.7620±0.0171 | 0.5875±0.0342 | 0.9365±0.0000 | 0.7783±0.0145 |
| 10  | 51.4±0.8944  | 62     | 0.8290±0.0144 | 0.7166±0.0211 | 0.5231±0.0344 | 0.9102±0.0112 | 0.7279±0.0225 |
| 11  | 48.6±1.1402  | 54     | 0.9000±0.0211 | 0.8286±0.0396 | 0.7000±0.0745 | 0.9571±0.0106 | 0.8463±0.0360 |
| 12  | 42.4±0.5477  | 50     | 0.8480±0.0110 | 0.7404±0.0228 | 0.5333±0.0456 | 0.9474±0.0000 | 0.7656±0.0214 |
| 13  | 36.6±1.1402  | 44     | 0.8318±0.0259 | 0.6736±0.0804 | 0.4250±0.1677 | 0.9222±0.0124 | 0.6832±0.0758 |
| 14  | 29.6±0.5477  | 37     | 0.8000±0.0148 | 0.6552±0.0256 | 0.4000±0.0559 | 0.9103±0.0189 | 0.6699±0.0246 |
| 15  | 24.8±0.8367  | 31     | 0.8000±0.0270 | 0.6786±0.0711 | 0.4571±0.1565 | 0.9000±0.0228 | 0.6859±0.0678 |
| 16  | 22.0±0.7071  | 28     | 0.7857±0.0253 | 0.6667±0.0505 | 0.4286±0.1010 | 0.9048±0.0000 | 0.6798±0.0515 |
| 17  | 21.0±0.7071  | 23     | 0.9130±0.0307 | 0.8441±0.0425 | 0.7000±0.0745 | 0.9882±0.0263 | 0.8755±0.0425 |
| 18  | 14.8±0.4472  | 16     | 0.9250±0.0280 | 0.8667±0.0186 | 0.7500±0.0000 | 0.9833±0.0373 | 0.8935±0.0336 |
| 19  | 9.4±0.5477   | 11     | 0.8545±0.0498 | 0.8536±0.0685 | 0.8500±0.1369 | 0.8571±0.0000 | 0.8445±0.0561 |
| 20  | 8.2±0.4472   | 10     | 0.8200±0.0447 | 0.8167±0.0559 | 0.8000±0.1118 | 0.8333±0.0000 | 0.8131±0.0480 |

Table 41: HM SVC with imputation, applying reference values, results of CV, taking best model of grid using accuracy. Predictions from admission.

| Day | Corrects     | Totals | Accuracy      | AUC           | Sensitivity   | Specificity   | F1            |
|-----|--------------|--------|---------------|---------------|---------------|---------------|---------------|
| 1   | 182.8±1.6432 | 194    | 0.9423±0.0085 | 0.9170±0.0124 | 0.8788±0.0214 | 0.9553±0.0081 | 0.9016±0.0138 |
| 2   | 179.8±1.6432 | 194    | 0.9268±0.0085 | 0.8571±0.0205 | 0.7515±0.0395 | 0.9627±0.0044 | 0.8667±0.0168 |
| 3   | 172.0±0.7071 | 187    | 0.9198±0.0038 | 0.8390±0.0077 | 0.7200±0.0183 | 0.9580±0.0057 | 0.8474±0.0061 |
| 4   | 163.8±1.7889 | 180    | 0.9100±0.0099 | 0.8238±0.0172 | 0.6966±0.0378 | 0.9510±0.0129 | 0.8303±0.0161 |
| 5   | 143.4±0.5477 | 160    | 0.8962±0.0034 | 0.7871±0.0210 | 0.6222±0.0483 | 0.9519±0.0067 | 0.8035±0.0127 |
| 6   | 122.2±1.0954 | 142    | 0.8606±0.0077 | 0.7392±0.0106 | 0.5520±0.0179 | 0.9265±0.0076 | 0.7493±0.0120 |
| 7   | 102.4±0.5477 | 117    | 0.8752±0.0047 | 0.7778±0.0163 | 0.6174±0.0364 | 0.9383±0.0048 | 0.7918±0.0117 |
| 8   | 83.4±0.8944  | 100    | 0.8340±0.0089 | 0.6800±0.0272 | 0.4316±0.0577 | 0.9284±0.0055 | 0.6981±0.0246 |
| 9   | 66.2±0.8367  | 79     | 0.8380±0.0106 | 0.6979±0.0162 | 0.4625±0.0342 | 0.9333±0.0133 | 0.7189±0.0166 |
| 10  | 49.8±1.9235  | 62     | 0.8032±0.0310 | 0.7003±0.0535 | 0.5231±0.1003 | 0.8776±0.0250 | 0.7006±0.0480 |
| 11  | 45.8±0.4472  | 54     | 0.8481±0.0083 | 0.7536±0.0053 | 0.5833±0.0000 | 0.9238±0.0106 | 0.7676±0.0091 |
| 12  | 41.0±0.7071  | 50     | 0.8200±0.0141 | 0.6934±0.0228 | 0.4500±0.0456 | 0.9368±0.0144 | 0.7163±0.0238 |
| 13  | 37.0±1.0000  | 44     | 0.8409±0.0227 | 0.6986±0.0258 | 0.4750±0.0559 | 0.9222±0.0304 | 0.7127±0.0300 |
| 14  | 29.4±0.8944  | 37     | 0.7946±0.0242 | 0.6427±0.0154 | 0.3750±0.0000 | 0.9103±0.0308 | 0.6583±0.0223 |
| 15  | 24.8±0.8367  | 31     | 0.8000±0.0270 | 0.6583±0.0352 | 0.4000±0.0639 | 0.9167±0.0295 | 0.6752±0.0415 |
| 16  | 22.0±1.0000  | 28     | 0.7857±0.0357 | 0.6571±0.0573 | 0.4000±0.1195 | 0.9143±0.0398 | 0.6710±0.0603 |
| 17  | 16.2±1.3038  | 23     | 0.7043±0.0567 | 0.5520±0.0664 | 0.2333±0.0913 | 0.8706±0.0492 | 0.5531±0.0774 |
| 18  | 8.4±0.5477   | 16     | 0.5250±0.0342 | 0.4667±0.0685 | 0.3500±0.1369 | 0.5833±0.0000 | 0.4570±0.0531 |
| 19  | 6.2±0.4472   | 11     | 0.5636±0.0407 | 0.5071±0.0559 | 0.3000±0.1118 | 0.7143±0.0000 | 0.5024±0.0586 |
| 20  | 7.8±0.4472   | 10     | 0.7800±0.0447 | 0.7667±0.0559 | 0.7000±0.1118 | 0.8333±0.0000 | 0.7674±0.0543 |

Table 42: HM SVC with imputation, applying reference values, results of CV, taking best model of grid using accuracy. Predictions from outcome.

| Day | Corrects     | Totals | Accuracy      | AUC           | Sensitivity   | Specificity   | F1            |
|-----|--------------|--------|---------------|---------------|---------------|---------------|---------------|
| 1   | 166.0±3.3912 | 194    | 0.8557±0.0175 | 0.7974±0.0365 | 0.7091±0.0664 | 0.8857±0.0094 | 0.7679±0.0299 |
| 2   | 168.2±2.8636 | 194    | 0.8670±0.0148 | 0.7512±0.0178 | 0.5758±0.0303 | 0.9267±0.0161 | 0.7583±0.0217 |
| 3   | 164.8±0.8367 | 187    | 0.8813±0.0045 | 0.7648±0.0169 | 0.5933±0.0365 | 0.9363±0.0045 | 0.7727±0.0120 |
| 4   | 161.2±1.6432 | 180    | 0.8956±0.0091 | 0.7817±0.0098 | 0.6138±0.0154 | 0.9497±0.0100 | 0.7966±0.0141 |
| 5   | 147.0±2.0000 | 160    | 0.9188±0.0125 | 0.8301±0.0232 | 0.6963±0.0406 | 0.9639±0.0082 | 0.8474±0.0237 |
| 6   | 129.6±1.3416 | 142    | 0.9127±0.0094 | 0.8369±0.0160 | 0.7200±0.0283 | 0.9538±0.0076 | 0.8456±0.0163 |
| 7   | 105.2±0.8367 | 117    | 0.8991±0.0072 | 0.8321±0.0127 | 0.7217±0.0238 | 0.9426±0.0058 | 0.8376±0.0117 |
| 8   | 86.6±1.1402  | 100    | 0.8660±0.0114 | 0.7884±0.0239 | 0.6632±0.0471 | 0.9136±0.0087 | 0.7847±0.0197 |
| 9   | 69.2±0.8367  | 79     | 0.8759±0.0106 | 0.7917±0.0188 | 0.6500±0.0342 | 0.9333±0.0071 | 0.8013±0.0176 |
| 10  | 51.2±1.0954  | 62     | 0.8258±0.0177 | 0.7146±0.0214 | 0.5231±0.0344 | 0.9061±0.0183 | 0.7246±0.0242 |
| 11  | 48.6±0.5477  | 54     | 0.9000±0.0101 | 0.8345±0.0228 | 0.7167±0.0456 | 0.9524±0.0000 | 0.8486±0.0182 |
| 12  | 43.0±0.7071  | 50     | 0.8600±0.0141 | 0.7768±0.0228 | 0.6167±0.0456 | 0.9368±0.0144 | 0.7945±0.0214 |
| 13  | 37.6±0.8944  | 44     | 0.8545±0.0203 | 0.7458±0.0559 | 0.5750±0.1118 | 0.9167±0.0000 | 0.7487±0.0495 |
| 14  | 30.2±0.8367  | 37     | 0.8162±0.0226 | 0.6836±0.0528 | 0.4500±0.1118 | 0.9172±0.0189 | 0.6982±0.0477 |
| 15  | 25.6±0.8944  | 31     | 0.8258±0.0289 | 0.7357±0.0670 | 0.5714±0.1429 | 0.9000±0.0228 | 0.7398±0.0561 |
| 16  | 22.2±0.8367  | 28     | 0.7929±0.0299 | 0.6810±0.0598 | 0.4571±0.1195 | 0.9048±0.0000 | 0.6934±0.0603 |
| 17  | 20.8±0.8367  | 23     | 0.9043±0.0364 | 0.8382±0.0462 | 0.7000±0.0745 | 0.9765±0.0322 | 0.8653±0.0492 |
| 18  | 14.4±0.5477  | 16     | 0.9000±0.0342 | 0.8500±0.0228 | 0.7500±0.0000 | 0.9500±0.0456 | 0.8634±0.0412 |
| 19  | 9.4±0.5477   | 11     | 0.8545±0.0498 | 0.8536±0.0685 | 0.8500±0.1369 | 0.8571±0.0000 | 0.8445±0.0561 |
| 20  | 8.4±0.5477   | 10     | 0.8400±0.0548 | 0.8417±0.0685 | 0.8500±0.1369 | 0.8333±0.0000 | 0.8346±0.0588 |

Table 43: HM SVC with imputation, applying reference values, results of CV, taking best model of grid using F1. Predictions from admission.



| Day | Corrects     | Totals | Accuracy      | AUC           | Sensitivity   | Specificity   | F1            |
|-----|--------------|--------|---------------|---------------|---------------|---------------|---------------|
| 1   | 182.4±1.8166 | 194    | 0.9402±0.0094 | 0.9182±0.0200 | 0.8848±0.0395 | 0.9516±0.0081 | 0.8989±0.0159 |
| 2   | 181.8±1.3038 | 194    | 0.9371±0.0067 | 0.8898±0.0205 | 0.8182±0.0429 | 0.9615±0.0052 | 0.8887±0.0135 |
| 3   | 172.4±2.0736 | 187    | 0.9219±0.0111 | 0.8537±0.0183 | 0.7533±0.0298 | 0.9541±0.0083 | 0.8548±0.0197 |
| 4   | 164.8±0.4472 | 180    | 0.9156±0.0025 | 0.8494±0.0060 | 0.7517±0.0154 | 0.9470±0.0047 | 0.8455±0.0036 |
| 5   | 145.2±1.3038 | 160    | 0.9075±0.0081 | 0.8233±0.0100 | 0.6963±0.0166 | 0.9504±0.0086 | 0.8312±0.0130 |
| 6   | 122.6±1.5166 | 142    | 0.8634±0.0107 | 0.7567±0.0088 | 0.5920±0.0179 | 0.9214±0.0140 | 0.7609±0.0128 |
| 7   | 103.0±0.0000 | 117    | 0.8803±0.0000 | 0.7909±0.0073 | 0.6435±0.0194 | 0.9383±0.0048 | 0.8026±0.0032 |
| 8   | 83.2±1.0954  | 100    | 0.8320±0.0110 | 0.6868±0.0241 | 0.4526±0.0471 | 0.9210±0.0068 | 0.7020±0.0231 |
| 9   | 66.4±1.6733  | 79     | 0.8405±0.0212 | 0.7182±0.0425 | 0.5125±0.0815 | 0.9238±0.0133 | 0.7331±0.0401 |
| 10  | 50.4±2.4083  | 62     | 0.8129±0.0388 | 0.7403±0.0615 | 0.6154±0.1088 | 0.8653±0.0310 | 0.7292±0.0550 |
| 11  | 45.2±0.4472  | 54     | 0.8370±0.0083 | 0.7464±0.0053 | 0.5833±0.0000 | 0.9095±0.0106 | 0.7555±0.0091 |
| 12  | 40.4±1.1402  | 50     | 0.8080±0.0228 | 0.6855±0.0225 | 0.4500±0.0456 | 0.9211±0.0322 | 0.7044±0.0269 |
| 13  | 37.0±1.4142  | 44     | 0.8409±0.0321 | 0.7083±0.0196 | 0.5000±0.0000 | 0.9167±0.0393 | 0.7204±0.0349 |
| 14  | 28.6±0.8944  | 37     | 0.7730±0.0242 | 0.6289±0.0154 | 0.3750±0.0000 | 0.8828±0.0308 | 0.6384±0.0221 |
| 15  | 24.4±0.8944  | 31     | 0.7871±0.0289 | 0.6601±0.0186 | 0.4286±0.0000 | 0.8917±0.0373 | 0.6721±0.0265 |
| 16  | 22.8±1.3038  | 28     | 0.8143±0.0466 | 0.6952±0.0661 | 0.4571±0.1195 | 0.9333±0.0426 | 0.7154±0.0731 |
| 17  | 16.2±0.8367  | 23     | 0.7043±0.0364 | 0.5735±0.0462 | 0.3000±0.0745 | 0.8471±0.0322 | 0.5772±0.0523 |
| 18  | 8.4±0.5477   | 16     | 0.5250±0.0342 | 0.4667±0.0685 | 0.3500±0.1369 | 0.5833±0.0000 | 0.4570±0.0531 |
| 19  | 6.2±0.4472   | 11     | 0.5636±0.0407 | 0.5071±0.0559 | 0.3000±0.1118 | 0.7143±0.0000 | 0.5024±0.0586 |
| 20  | 7.8±0.4472   | 10     | 0.7800±0.0447 | 0.7667±0.0559 | 0.7000±0.1118 | 0.8333±0.0000 | 0.7674±0.0543 |

Table 44: HM SVC with imputation, applying reference values, results of CV, taking best model of grid using F1. Predictions from outcome.

| Day | Corrects     | Totals | Accuracy      | AUC           | Sensitivity   | Specificity   | F1            |
|-----|--------------|--------|---------------|---------------|---------------|---------------|---------------|
| 1   | 157.2±2.3875 | 194    | 0.8103±0.0123 | 0.7556±0.0049 | 0.6727±0.0136 | 0.8385±0.0170 | 0.7136±0.0108 |
| 2   | 167.2±1.6432 | 194    | 0.8619±0.0085 | 0.7698±0.0088 | 0.6303±0.0136 | 0.9093±0.0094 | 0.7623±0.0115 |
| 3   | 167.8±0.8367 | 187    | 0.8973±0.0045 | 0.8283±0.0063 | 0.7267±0.0149 | 0.9299±0.0064 | 0.8163±0.0062 |
| 4   | 160.6±0.8944 | 180    | 0.8922±0.0050 | 0.8327±0.0070 | 0.7448±0.0189 | 0.9205±0.0081 | 0.8125±0.0060 |
| 5   | 146.4±1.1402 | 160    | 0.9150±0.0071 | 0.8456±0.0186 | 0.7407±0.0370 | 0.9504±0.0041 | 0.8475±0.0143 |
| 6   | 131.2±1.3038 | 142    | 0.9239±0.0092 | 0.8784±0.0182 | 0.8080±0.0335 | 0.9487±0.0060 | 0.8713±0.0160 |
| 7   | 106.2±1.3038 | 117    | 0.9077±0.0111 | 0.8572±0.0205 | 0.7739±0.0364 | 0.9404±0.0058 | 0.8548±0.0183 |
| 8   | 86.6±1.8166  | 100    | 0.8660±0.0182 | 0.8206±0.0273 | 0.7474±0.0440 | 0.8938±0.0141 | 0.7974±0.0266 |
| 9   | 69.2±1.3038  | 79     | 0.8759±0.0165 | 0.8150±0.0226 | 0.7125±0.0342 | 0.9175±0.0133 | 0.8107±0.0240 |
| 10  | 53.2±1.6432  | 62     | 0.8581±0.0265 | 0.8198±0.0531 | 0.7538±0.1003 | 0.8857±0.0112 | 0.7982±0.0424 |
| 11  | 47.8±1.4832  | 54     | 0.8852±0.0275 | 0.8131±0.0409 | 0.6833±0.0697 | 0.9429±0.0213 | 0.8264±0.0421 |
| 12  | 43.4±1.5166  | 50     | 0.8680±0.0303 | 0.8048±0.0428 | 0.6833±0.0697 | 0.9263±0.0220 | 0.8136±0.0429 |
| 13  | 39.8±1.0954  | 44     | 0.9045±0.0249 | 0.8056±0.0333 | 0.6500±0.0559 | 0.9611±0.0248 | 0.8281±0.0385 |
| 14  | 31.6±0.8944  | 37     | 0.8541±0.0242 | 0.7802±0.0346 | 0.6500±0.0559 | 0.9103±0.0189 | 0.7828±0.0348 |
| 15  | 27.8±1.0954  | 31     | 0.8968±0.0353 | 0.8321±0.0582 | 0.7143±0.1010 | 0.9500±0.0186 | 0.8453±0.0547 |
| 16  | 23.2±0.4472  | 28     | 0.8286±0.0160 | 0.8095±0.0337 | 0.7714±0.0782 | 0.8476±0.0213 | 0.7862±0.0228 |
| 17  | 20.6±1.5166  | 23     | 0.8957±0.0659 | 0.8647±0.0876 | 0.8000±0.1394 | 0.9294±0.0492 | 0.8643±0.0859 |
| 18  | 13.6±0.8944  | 16     | 0.8500±0.0559 | 0.7833±0.0745 | 0.6500±0.1369 | 0.9167±0.0589 | 0.7923±0.0785 |
| 19  | 10.4±0.5477  | 11     | 0.9455±0.0498 | 0.9571±0.0391 | 1.0000±0.0000 | 0.9143±0.0782 | 0.9436±0.0515 |
| 20  | 8.4±0.5477   | 10     | 0.8400±0.0548 | 0.8417±0.0685 | 0.8500±0.1369 | 0.8333±0.0000 | 0.8346±0.0588 |

Table 45: HM SVC with missing flags, results of CV, taking best model of grid using accuracy. Predictions from admission.

| Day | Corrects     | Totals | Accuracy      | AUC           | Sensitivity   | Specificity   | F1            |
|-----|--------------|--------|---------------|---------------|---------------|---------------|---------------|
| 1   | 176.8±1.3038 | 194    | 0.9113±0.0067 | 0.8888±0.0082 | 0.8545±0.0136 | 0.9230±0.0071 | 0.8559±0.0097 |
| 2   | 181.8±0.8367 | 194    | 0.9371±0.0043 | 0.8898±0.0099 | 0.8182±0.0214 | 0.9615±0.0052 | 0.8889±0.0074 |
| 3   | 172.2±1.7889 | 187    | 0.9209±0.0096 | 0.8612±0.0104 | 0.7733±0.0149 | 0.9490±0.0101 | 0.8556±0.0151 |
| 4   | 167.4±1.3416 | 180    | 0.9300±0.0075 | 0.8858±0.0160 | 0.8207±0.0289 | 0.9510±0.0036 | 0.8743±0.0139 |
| 5   | 144.8±0.4472 | 160    | 0.9050±0.0028 | 0.8632±0.0092 | 0.8000±0.0203 | 0.9263±0.0034 | 0.8408±0.0055 |
| 6   | 125.6±1.5166 | 142    | 0.8845±0.0107 | 0.8230±0.0260 | 0.7280±0.0522 | 0.9179±0.0076 | 0.8090±0.0197 |
| 7   | 102.8±1.6432 | 117    | 0.8786±0.0140 | 0.8062±0.0357 | 0.6870±0.0714 | 0.9255±0.0000 | 0.8066±0.0285 |
| 8   | 89.0±1.0000  | 100    | 0.8900±0.0100 | 0.8193±0.0285 | 0.7053±0.0600 | 0.9333±0.0068 | 0.8201±0.0203 |
| 9   | 66.8±2.0494  | 79     | 0.8456±0.0259 | 0.7913±0.0336 | 0.7000±0.0523 | 0.8825±0.0241 | 0.7746±0.0352 |
| 10  | 50.8±0.8367  | 62     | 0.8194±0.0135 | 0.7614±0.0233 | 0.6615±0.0421 | 0.8612±0.0091 | 0.7441±0.0203 |
| 11  | 46.4±0.8944  | 54     | 0.8593±0.0166 | 0.7964±0.0346 | 0.6833±0.0697 | 0.9095±0.0106 | 0.7959±0.0281 |
| 12  | 40.2±1.9235  | 50     | 0.8040±0.0385 | 0.7342±0.0364 | 0.6000±0.0373 | 0.8684±0.0416 | 0.7338±0.0440 |
| 13  | 34.2±0.4472  | 44     | 0.7773±0.0102 | 0.6208±0.0349 | 0.3750±0.0884 | 0.8667±0.0232 | 0.6201±0.0287 |
| 14  | 27.0±1.0000  | 37     | 0.7297±0.0270 | 0.6375±0.0539 | 0.4750±0.1046 | 0.8000±0.0154 | 0.6261±0.0455 |
| 15  | 22.6±0.5477  | 31     | 0.7290±0.0177 | 0.6327±0.0516 | 0.4571±0.1195 | 0.8083±0.0228 | 0.6247±0.0428 |
| 16  | 20.2±2.7749  | 28     | 0.7214±0.0991 | 0.6714±0.1230 | 0.5714±0.1750 | 0.7714±0.0782 | 0.6572±0.1198 |
| 17  | 18.4±0.8944  | 23     | 0.8000±0.0389 | 0.7245±0.0502 | 0.5667±0.0913 | 0.8824±0.0416 | 0.7313±0.0491 |
| 18  | 10.0±0.7071  | 16     | 0.6250±0.0442 | 0.6000±0.0475 | 0.5500±0.1118 | 0.6500±0.0697 | 0.5712±0.0383 |
| 19  | 8.0±0.7071   | 11     | 0.7273±0.0643 | 0.7214±0.0710 | 0.7000±0.1118 | 0.7429±0.0639 | 0.7129±0.0698 |
| 20  | 7.2±0.4472   | 10     | 0.7200±0.0447 | 0.7250±0.0373 | 0.7500±0.0000 | 0.7000±0.0745 | 0.7159±0.0423 |

Table 46: HM SVC with missing flags, results of CV, taking best model of grid using accuracy. Predictions from outcome.

| Day | Corrects     | Totals | Accuracy      | AUC           | Sensitivity   | Specificity   | F1            |
|-----|--------------|--------|---------------|---------------|---------------|---------------|---------------|
| 1   | 156.6±2.3022 | 194    | 0.8072±0.0119 | 0.7730±0.0155 | 0.7212±0.0254 | 0.8248±0.0119 | 0.7184±0.0147 |
| 2   | 167.0±1.5811 | 194    | 0.8608±0.0082 | 0.7740±0.0142 | 0.6424±0.0254 | 0.9056±0.0068 | 0.7631±0.0134 |
| 3   | 166.8±0.8367 | 187    | 0.8920±0.0045 | 0.8305±0.0118 | 0.7400±0.0279 | 0.9210±0.0073 | 0.8110±0.0073 |
| 4   | 159.6±0.8944 | 180    | 0.8867±0.0050 | 0.8294±0.0085 | 0.7448±0.0189 | 0.9139±0.0066 | 0.8052±0.0072 |
| 5   | 146.8±1.3038 | 160    | 0.9175±0.0081 | 0.8618±0.0195 | 0.7778±0.0370 | 0.9459±0.0034 | 0.8554±0.0156 |
| 6   | 130.8±1.4832 | 142    | 0.9211±0.0104 | 0.8766±0.0188 | 0.8080±0.0335 | 0.9453±0.0076 | 0.8674±0.0177 |
| 7   | 106.2±0.8367 | 117    | 0.9077±0.0072 | 0.8703±0.0086 | 0.8087±0.0238 | 0.9319±0.0121 | 0.8585±0.0086 |
| 8   | 87.2±2.0494  | 100    | 0.8720±0.0205 | 0.8404±0.0316 | 0.7895±0.0526 | 0.8914±0.0161 | 0.8098±0.0295 |
| 9   | 69.8±0.8367  | 79     | 0.8835±0.0106 | 0.8244±0.0188 | 0.7250±0.0342 | 0.9238±0.0071 | 0.8213±0.0170 |
| 10  | 54.2±1.3038  | 62     | 0.8742±0.0210 | 0.8526±0.0276 | 0.8154±0.0421 | 0.8898±0.0183 | 0.8246±0.0281 |
| 11  | 48.0±1.0000  | 54     | 0.8889±0.0185 | 0.8274±0.0276 | 0.7167±0.0456 | 0.9381±0.0130 | 0.8353±0.0277 |
| 12  | 45.2±1.6432  | 50     | 0.9040±0.0329 | 0.8684±0.0592 | 0.8000±0.1118 | 0.9368±0.0144 | 0.8674±0.0466 |
| 13  | 40.0±1.4142  | 44     | 0.9091±0.0321 | 0.8375±0.0582 | 0.7250±0.1046 | 0.9500±0.0232 | 0.8438±0.0546 |
| 14  | 32.2±1.0954  | 37     | 0.8703±0.0296 | 0.8358±0.0537 | 0.7750±0.1046 | 0.8966±0.0244 | 0.8175±0.0439 |
| 15  | 28.6±0.8944  | 31     | 0.9226±0.0289 | 0.8893±0.0413 | 0.8286±0.0639 | 0.9500±0.0186 | 0.8893±0.0413 |
| 16  | 23.0±1.0000  | 28     | 0.8214±0.0357 | 0.8048±0.0488 | 0.7714±0.0782 | 0.8381±0.0261 | 0.7795±0.0439 |
| 17  | 20.6±1.5166  | 23     | 0.8957±0.0659 | 0.8647±0.0876 | 0.8000±0.1394 | 0.9294±0.0492 | 0.8643±0.0859 |
| 18  | 13.8±0.8367  | 16     | 0.8625±0.0523 | 0.8083±0.0632 | 0.7000±0.1118 | 0.9167±0.0589 | 0.8138±0.0700 |
| 19  | 10.2±0.4472  | 11     | 0.9273±0.0407 | 0.9429±0.0319 | 1.0000±0.0000 | 0.8857±0.0639 | 0.9248±0.0420 |
| 20  | 8.6±0.5477   | 10     | 0.8600±0.0548 | 0.8667±0.0685 | 0.9000±0.1369 | 0.8333±0.0000 | 0.8561±0.0588 |

Table 47: HM SVC with missing flags, results of CV, taking best model of grid using F1. Predictions from admission.

| Day | Corrects     | Totals | Accuracy      | AUC           | Sensitivity   | Specificity   | F1            |
|-----|--------------|--------|---------------|---------------|---------------|---------------|---------------|
| 1   | 176.6±1.3416 | 194    | 0.9103±0.0069 | 0.8881±0.0085 | 0.8545±0.0136 | 0.9217±0.0071 | 0.8545±0.0100 |
| 2   | 182.4±1.5166 | 194    | 0.9402±0.0078 | 0.8965±0.0094 | 0.8303±0.0166 | 0.9627±0.0088 | 0.8947±0.0125 |
| 3   | 171.8±0.8367 | 187    | 0.9187±0.0045 | 0.8707±0.0119 | 0.8000±0.0236 | 0.9414±0.0028 | 0.8552±0.0087 |
| 4   | 167.6±2.4083 | 180    | 0.9311±0.0134 | 0.8949±0.0266 | 0.8414±0.0463 | 0.9483±0.0073 | 0.8779±0.0241 |
| 5   | 144.0±1.2247 | 160    | 0.9000±0.0077 | 0.8602±0.0175 | 0.8000±0.0331 | 0.9203±0.0041 | 0.8341±0.0136 |
| 6   | 127.4±1.8166 | 142    | 0.8972±0.0128 | 0.8621±0.0140 | 0.8080±0.0179 | 0.9162±0.0127 | 0.8356±0.0180 |
| 7   | 103.0±1.5811 | 117    | 0.8803±0.0135 | 0.8303±0.0219 | 0.7478±0.0364 | 0.9128±0.0089 | 0.8176±0.0207 |
| 8   | 89.2±1.6432  | 100    | 0.8920±0.0164 | 0.8366±0.0318 | 0.7474±0.0577 | 0.9259±0.0087 | 0.8284±0.0277 |
| 9   | 67.4±1.6733  | 79     | 0.8532±0.0212 | 0.8054±0.0339 | 0.7250±0.0559 | 0.8857±0.0133 | 0.7862±0.0311 |
| 10  | 50.2±1.6432  | 62     | 0.8097±0.0265 | 0.7779±0.0416 | 0.7231±0.0688 | 0.8327±0.0171 | 0.7439±0.0364 |
| 11  | 45.8±1.6432  | 54     | 0.8481±0.0304 | 0.7952±0.0433 | 0.7000±0.0745 | 0.8905±0.0271 | 0.7866±0.0416 |
| 12  | 40.4±2.1909  | 50     | 0.8080±0.0438 | 0.7425±0.0409 | 0.6167±0.0456 | 0.8684±0.0492 | 0.7409±0.0485 |
| 13  | 34.8±0.8367  | 44     | 0.7909±0.0190 | 0.6583±0.0507 | 0.4500±0.1118 | 0.8667±0.0232 | 0.6529±0.0460 |
| 14  | 27.0±1.0000  | 37     | 0.7297±0.0270 | 0.6647±0.0482 | 0.5500±0.1118 | 0.7793±0.0393 | 0.6419±0.0384 |
| 15  | 23.2±0.4472  | 31     | 0.7484±0.0144 | 0.6756±0.0501 | 0.5429±0.1195 | 0.8083±0.0228 | 0.6609±0.0349 |
| 16  | 20.8±1.0954  | 28     | 0.7429±0.0391 | 0.7333±0.0543 | 0.7143±0.1010 | 0.7524±0.0398 | 0.6975±0.0455 |
| 17  | 18.6±0.5477  | 23     | 0.8087±0.0238 | 0.7304±0.0420 | 0.5667±0.0913 | 0.8941±0.0263 | 0.7392±0.0367 |
| 18  | 9.8±0.8367   | 16     | 0.6125±0.0523 | 0.6083±0.0632 | 0.6000±0.1369 | 0.6167±0.0745 | 0.5688±0.0493 |
| 19  | 8.0±0.7071   | 11     | 0.7273±0.0643 | 0.7214±0.0710 | 0.7000±0.1118 | 0.7429±0.0639 | 0.7129±0.0698 |
| 20  | 7.2±0.4472   | 10     | 0.7200±0.0447 | 0.7250±0.0373 | 0.7500±0.0000 | 0.7000±0.0745 | 0.7159±0.0423 |

Table 48: HM SVC with missing flags, results of CV, taking best model of grid using F1. Predictions from outcome.

| Day | Corrects     | Totals | Accuracy      | AUC           | Sensitivity   | Specificity   | F1            |
|-----|--------------|--------|---------------|---------------|---------------|---------------|---------------|
| 1   | 161.2±1.9235 | 194    | 0.8309±0.0099 | 0.7464±0.0253 | 0.6182±0.0507 | 0.8745±0.0068 | 0.7248±0.0190 |
| 2   | 167.2±2.1679 | 194    | 0.8619±0.0112 | 0.7361±0.0179 | 0.5455±0.0303 | 0.9267±0.0092 | 0.7455±0.0191 |
| 3   | 165.2±1.3038 | 187    | 0.8834±0.0070 | 0.7634±0.0133 | 0.5867±0.0380 | 0.9401±0.0140 | 0.7743±0.0076 |
| 4   | 163.0±1.0000 | 180    | 0.9056±0.0056 | 0.8156±0.0085 | 0.6828±0.0154 | 0.9483±0.0055 | 0.8218±0.0094 |
| 5   | 147.0±1.2247 | 160    | 0.9187±0.0077 | 0.8301±0.0121 | 0.6963±0.0310 | 0.9639±0.0124 | 0.8475±0.0113 |
| 6   | 129.6±1.1402 | 142    | 0.9127±0.0080 | 0.8275±0.0126 | 0.6960±0.0219 | 0.9590±0.0072 | 0.8425±0.0136 |
| 7   | 105.8±1.3038 | 117    | 0.9043±0.0111 | 0.8288±0.0124 | 0.7043±0.0194 | 0.9532±0.0121 | 0.8423±0.0160 |
| 8   | 86.2±1.3038  | 100    | 0.8620±0.0130 | 0.7658±0.0204 | 0.6105±0.0471 | 0.9210±0.0187 | 0.7711±0.0181 |
| 9   | 69.4±0.8944  | 79     | 0.8785±0.0113 | 0.7839±0.0071 | 0.6250±0.0000 | 0.9429±0.0142 | 0.8007±0.0138 |
| 10  | 52.0±0.7071  | 62     | 0.8387±0.0114 | 0.7397±0.0209 | 0.5692±0.0421 | 0.9102±0.0112 | 0.7478±0.0188 |
| 11  | 48.2±0.4472  | 54     | 0.8926±0.0083 | 0.8119±0.0053 | 0.6667±0.0000 | 0.9571±0.0106 | 0.8334±0.0105 |
| 12  | 42.4±0.8944  | 50     | 0.8480±0.0179 | 0.7575±0.0303 | 0.5833±0.0589 | 0.9316±0.0144 | 0.7752±0.0289 |
| 13  | 36.8±0.8367  | 44     | 0.8364±0.0190 | 0.6764±0.0363 | 0.4250±0.0685 | 0.9278±0.0152 | 0.6937±0.0374 |
| 14  | 30.6±1.1402  | 37     | 0.8270±0.0308 | 0.6724±0.0366 | 0.4000±0.0559 | 0.9448±0.0308 | 0.6982±0.0444 |
| 15  | 24.8±0.8367  | 31     | 0.8000±0.0270 | 0.6583±0.0598 | 0.4000±0.1195 | 0.9167±0.0000 | 0.6726±0.0607 |
| 16  | 22.2±0.4472  | 28     | 0.7929±0.0160 | 0.7000±0.0319 | 0.5143±0.0782 | 0.8857±0.0261 | 0.7084±0.0282 |
| 17  | 21.2±1.7889  | 23     | 0.9217±0.0778 | 0.8716±0.1211 | 0.7667±0.2236 | 0.9765±0.0526 | 0.8879±0.1087 |
| 18  | 14.8±0.4472  | 16     | 0.9250±0.0280 | 0.8667±0.0186 | 0.7500±0.0000 | 0.9833±0.0373 | 0.8935±0.0336 |
| 19  | 9.0±1.0000   | 11     | 0.8182±0.0909 | 0.8250±0.0887 | 0.8500±0.1369 | 0.8000±0.1278 | 0.8108±0.0915 |
| 20  | 8.0±0.0000   | 10     | 0.8000±0.0000 | 0.7917±0.0000 | 0.7500±0.0000 | 0.8333±0.0000 | 0.7917±0.0000 |

Table 49: HM SVC applying laboratory reference values, results of CV, taking best model of grid using accuracy. Predictions from admission.

| Day | Corrects     | Totals | Accuracy      | AUC           | Sensitivity   | Specificity   | F1            |
|-----|--------------|--------|---------------|---------------|---------------|---------------|---------------|
| 1   | 161.2±1.9235 | 194    | 0.8309±0.0099 | 0.7464±0.0253 | 0.6182±0.0507 | 0.8745±0.0068 | 0.7248±0.0190 |
| 2   | 167.2±2.1679 | 194    | 0.8619±0.0112 | 0.7361±0.0179 | 0.5455±0.0303 | 0.9267±0.0092 | 0.7455±0.0191 |
| 3   | 165.2±1.3038 | 187    | 0.8834±0.0070 | 0.7634±0.0133 | 0.5867±0.0380 | 0.9401±0.0140 | 0.7743±0.0076 |
| 4   | 163.0±1.0000 | 180    | 0.9056±0.0056 | 0.8156±0.0085 | 0.6828±0.0154 | 0.9483±0.0055 | 0.8218±0.0094 |
| 5   | 147.0±1.2247 | 160    | 0.9187±0.0077 | 0.8301±0.0121 | 0.6963±0.0310 | 0.9639±0.0124 | 0.8475±0.0113 |
| 6   | 129.6±1.1402 | 142    | 0.9127±0.0080 | 0.8275±0.0126 | 0.6960±0.0219 | 0.9590±0.0072 | 0.8425±0.0136 |
| 7   | 105.8±1.3038 | 117    | 0.9043±0.0111 | 0.8288±0.0124 | 0.7043±0.0194 | 0.9532±0.0121 | 0.8423±0.0160 |
| 8   | 86.2±1.3038  | 100    | 0.8620±0.0130 | 0.7658±0.0204 | 0.6105±0.0471 | 0.9210±0.0187 | 0.7711±0.0181 |
| 9   | 69.4±0.8944  | 79     | 0.8785±0.0113 | 0.7839±0.0071 | 0.6250±0.0000 | 0.9429±0.0142 | 0.8007±0.0138 |
| 10  | 52.0±0.7071  | 62     | 0.8387±0.0114 | 0.7397±0.0209 | 0.5692±0.0421 | 0.9102±0.0112 | 0.7478±0.0188 |
| 11  | 48.2±0.4472  | 54     | 0.8926±0.0083 | 0.8119±0.0053 | 0.6667±0.0000 | 0.9571±0.0106 | 0.8334±0.0105 |
| 12  | 42.4±0.8944  | 50     | 0.8480±0.0179 | 0.7575±0.0303 | 0.5833±0.0589 | 0.9316±0.0144 | 0.7752±0.0289 |
| 13  | 36.8±0.8367  | 44     | 0.8364±0.0190 | 0.6764±0.0363 | 0.4250±0.0685 | 0.9278±0.0152 | 0.6937±0.0374 |
| 14  | 30.6±1.1402  | 37     | 0.8270±0.0308 | 0.6724±0.0366 | 0.4000±0.0559 | 0.9448±0.0308 | 0.6982±0.0444 |
| 15  | 24.8±0.8367  | 31     | 0.8000±0.0270 | 0.6583±0.0598 | 0.4000±0.1195 | 0.9167±0.0000 | 0.6726±0.0607 |
| 16  | 22.2±0.4472  | 28     | 0.7929±0.0160 | 0.7000±0.0319 | 0.5143±0.0782 | 0.8857±0.0261 | 0.7084±0.0282 |
| 17  | 21.2±1.7889  | 23     | 0.9217±0.0778 | 0.8716±0.1211 | 0.7667±0.2236 | 0.9765±0.0526 | 0.8879±0.1087 |
| 18  | 14.8±0.4472  | 16     | 0.9250±0.0280 | 0.8667±0.0186 | 0.7500±0.0000 | 0.9833±0.0373 | 0.8935±0.0336 |
| 19  | 9.0±1.0000   | 11     | 0.8182±0.0909 | 0.8250±0.0887 | 0.8500±0.1369 | 0.8000±0.1278 | 0.8108±0.0915 |
| 20  | 8.0±0.0000   | 10     | 0.8000±0.0000 | 0.7917±0.0000 | 0.7500±0.0000 | 0.8333±0.0000 | 0.7917±0.0000 |

Table 50: HM SVC applying laboratory reference values, results of CV, taking best model of grid using accuracy. Predictions from outcome.

| Day | Corrects     | Totals | Accuracy      | AUC           | Sensitivity   | Specificity   | F1            |
|-----|--------------|--------|---------------|---------------|---------------|---------------|---------------|
| 1   | 164.2±2.7749 | 194    | 0.8464±0.0143 | 0.7942±0.0267 | 0.7152±0.0507 | 0.8733±0.0129 | 0.7585±0.0221 |
| 2   | 167.8±1.6432 | 194    | 0.8649±0.0085 | 0.7524±0.0172 | 0.5818±0.0332 | 0.9230±0.0071 | 0.7566±0.0155 |
| 3   | 165.2±1.3038 | 187    | 0.8834±0.0070 | 0.7904±0.0077 | 0.6533±0.0183 | 0.9274±0.0097 | 0.7866±0.0090 |
| 4   | 163.0±1.4142 | 180    | 0.9056±0.0079 | 0.8323±0.0047 | 0.7241±0.0000 | 0.9404±0.0094 | 0.8278±0.0111 |
| 5   | 147.0±1.5811 | 160    | 0.9187±0.0099 | 0.8449±0.0116 | 0.7333±0.0166 | 0.9564±0.0098 | 0.8523±0.0160 |
| 6   | 130.0±1.0000 | 142    | 0.9155±0.0070 | 0.8418±0.0101 | 0.7280±0.0179 | 0.9556±0.0072 | 0.8506±0.0113 |
| 7   | 105.0±1.2247 | 117    | 0.8974±0.0105 | 0.8475±0.0089 | 0.7652±0.0238 | 0.9298±0.0161 | 0.8409±0.0122 |
| 8   | 85.8±1.4832  | 100    | 0.8580±0.0148 | 0.7875±0.0166 | 0.6737±0.0235 | 0.9012±0.0151 | 0.7775±0.0200 |
| 9   | 69.4±0.5477  | 79     | 0.8785±0.0069 | 0.7933±0.0104 | 0.6500±0.0342 | 0.9365±0.0159 | 0.8045±0.0064 |
| 10  | 51.8±0.4472  | 62     | 0.8355±0.0072 | 0.7546±0.0046 | 0.6154±0.0000 | 0.8939±0.0091 | 0.7533±0.0076 |
| 11  | 48.6±0.5477  | 54     | 0.9000±0.0101 | 0.8286±0.0212 | 0.7000±0.0456 | 0.9571±0.0106 | 0.8467±0.0169 |
| 12  | 43.2±0.8367  | 50     | 0.8640±0.0167 | 0.7908±0.0226 | 0.6500±0.0373 | 0.9316±0.0144 | 0.8044±0.0239 |
| 13  | 38.8±1.0954  | 44     | 0.8818±0.0249 | 0.7917±0.0545 | 0.6500±0.1046 | 0.9333±0.0152 | 0.7963±0.0477 |
| 14  | 31.6±1.1402  | 37     | 0.8541±0.0308 | 0.7349±0.0366 | 0.5250±0.0559 | 0.9448±0.0308 | 0.7601±0.0434 |
| 15  | 26.2±1.3038  | 31     | 0.8452±0.0421 | 0.7583±0.0931 | 0.6000±0.1863 | 0.9167±0.0000 | 0.7640±0.0782 |
| 16  | 21.6±0.8944  | 28     | 0.7714±0.0319 | 0.6857±0.0639 | 0.5143±0.1278 | 0.8571±0.0000 | 0.6870±0.0554 |
| 17  | 21.2±2.0494  | 23     | 0.9217±0.0891 | 0.8931±0.1348 | 0.8333±0.2357 | 0.9529±0.0492 | 0.8931±0.1244 |
| 18  | 13.8±0.4472  | 16     | 0.8625±0.0280 | 0.8250±0.0186 | 0.7500±0.0000 | 0.9000±0.0373 | 0.8203±0.0292 |
| 19  | 9.6±0.8944   | 11     | 0.8727±0.0813 | 0.9000±0.0639 | 1.0000±0.0000 | 0.8000±0.1278 | 0.8712±0.0817 |
| 20  | 8.0±0.0000   | 10     | 0.8000±0.0000 | 0.7917±0.0000 | 0.7500±0.0000 | 0.8333±0.0000 | 0.7917±0.0000 |

Table 51: HM SVC applying laboratory reference values, results of CV, taking best model of grid using F1. Predictions from admission.

| Day | Corrects     | Totals | Accuracy      | AUC           | Sensitivity   | Specificity   | F1            |
|-----|--------------|--------|---------------|---------------|---------------|---------------|---------------|
| 1   | 175.0±1.7321 | 194    | 0.9021±0.0089 | 0.8735±0.0182 | 0.8303±0.0346 | 0.9168±0.0071 | 0.8410±0.0147 |
| 2   | 179.2±2.1679 | 194    | 0.9237±0.0112 | 0.8697±0.0212 | 0.7879±0.0371 | 0.9516±0.0068 | 0.8661±0.0200 |
| 3   | 171.2±1.3038 | 187    | 0.9155±0.0070 | 0.8445±0.0096 | 0.7400±0.0149 | 0.9490±0.0064 | 0.8437±0.0117 |
| 4   | 165.6±1.6733 | 180    | 0.9200±0.0093 | 0.8632±0.0201 | 0.7793±0.0393 | 0.9470±0.0081 | 0.8552±0.0171 |
| 5   | 149.0±1.4142 | 160    | 0.9313±0.0088 | 0.8701±0.0139 | 0.7778±0.0262 | 0.9624±0.0092 | 0.8757±0.0150 |
| 6   | 125.4±2.3022 | 142    | 0.8831±0.0162 | 0.8095±0.0274 | 0.6960±0.0537 | 0.9231±0.0171 | 0.8028±0.0252 |
| 7   | 105.4±0.8944 | 117    | 0.9009±0.0076 | 0.8168±0.0190 | 0.6783±0.0389 | 0.9553±0.0048 | 0.8339±0.0154 |
| 8   | 89.6±1.5166  | 100    | 0.8960±0.0152 | 0.8069±0.0306 | 0.6632±0.0600 | 0.9506±0.0123 | 0.8220±0.0276 |
| 9   | 67.4±0.8944  | 79     | 0.8532±0.0113 | 0.7727±0.0241 | 0.6375±0.0523 | 0.9079±0.0133 | 0.7724±0.0193 |
| 10  | 51.0±0.7071  | 62     | 0.8226±0.0114 | 0.7860±0.0209 | 0.7231±0.0421 | 0.8490±0.0112 | 0.7569±0.0162 |
| 11  | 45.6±1.6733  | 54     | 0.8444±0.0310 | 0.7571±0.0254 | 0.6000±0.0373 | 0.9143±0.0398 | 0.7674±0.0346 |
| 12  | 38.8±0.4472  | 50     | 0.7760±0.0089 | 0.6816±0.0059 | 0.5000±0.0000 | 0.8632±0.0118 | 0.6858±0.0082 |
| 13  | 36.2±1.0954  | 44     | 0.8227±0.0249 | 0.6875±0.0333 | 0.4750±0.0559 | 0.9000±0.0248 | 0.6933±0.0368 |
| 14  | 27.0±1.0000  | 37     | 0.7297±0.0270 | 0.6194±0.0361 | 0.4250±0.0685 | 0.8138±0.0308 | 0.6146±0.0338 |
| 15  | 23.4±0.8944  | 31     | 0.7548±0.0289 | 0.6292±0.0327 | 0.4000±0.0639 | 0.8583±0.0373 | 0.6339±0.0368 |
| 16  | 22.4±0.8944  | 28     | 0.8000±0.0319 | 0.7048±0.0621 | 0.5143±0.1278 | 0.8952±0.0213 | 0.7134±0.0630 |
| 17  | 16.4±0.5477  | 23     | 0.7130±0.0238 | 0.6010±0.0363 | 0.3667±0.0745 | 0.8353±0.0263 | 0.6048±0.0353 |
| 18  | 9.0±0.0000   | 16     | 0.5625±0.0000 | 0.4583±0.0000 | 0.2500±0.0000 | 0.6667±0.0000 | 0.4589±0.0000 |
| 19  | 7.0±0.7071   | 11     | 0.6364±0.0643 | 0.6071±0.0884 | 0.5000±0.1768 | 0.7143±0.0000 | 0.6031±0.0857 |
| 20  | 7.2±0.4472   | 10     | 0.7200±0.0447 | 0.6917±0.0559 | 0.5500±0.1118 | 0.8333±0.0000 | 0.6946±0.0543 |

Table 52: HM SVC applying laboratory reference values, results of CV, taking best model of grid using F1. Predictions from outcome.

## 2.3 Ensemble Daily Results

| Day | Corrects     | Totals | Accuracy      | AUC           | Sensitivity   | Specificity   | F1            |
|-----|--------------|--------|---------------|---------------|---------------|---------------|---------------|
| 1   | 166.2±1.7889 | 194    | 0.8567±0.0092 | 0.7599±0.0245 | 0.4667±0.0460 | 0.9366±0.0052 | 0.7203±0.0221 |
| 2   | 167.2±0.4472 | 194    | 0.8619±0.0023 | 0.7790±0.0235 | 0.5576±0.0346 | 0.9242±0.0068 | 0.7478±0.0085 |
| 3   | 166.4±0.8944 | 187    | 0.8898±0.0048 | 0.8469±0.0035 | 0.6467±0.0298 | 0.9363±0.0064 | 0.7938±0.0097 |
| 4   | 165.4±1.3416 | 180    | 0.9189±0.0075 | 0.8799±0.0086 | 0.7172±0.0663 | 0.9576±0.0166 | 0.8458±0.0131 |
| 5   | 146.4±1.1402 | 160    | 0.9150±0.0071 | 0.9119±0.0064 | 0.7259±0.0422 | 0.9534±0.0124 | 0.8457±0.0114 |
| 6   | 130.2±1.7889 | 142    | 0.9169±0.0126 | 0.9354±0.0216 | 0.7520±0.0179 | 0.9521±0.0155 | 0.8558±0.0183 |
| 7   | 109.2±1.0954 | 117    | 0.9333±0.0094 | 0.9556±0.0128 | 0.8348±0.0194 | 0.9574±0.0130 | 0.8950±0.0131 |
| 8   | 92.4±0.8944  | 100    | 0.9240±0.0089 | 0.9511±0.0036 | 0.8526±0.0235 | 0.9407±0.0135 | 0.8814±0.0120 |
| 9   | 73.0±1.2247  | 79     | 0.9241±0.0155 | 0.9496±0.0041 | 0.8375±0.0713 | 0.9460±0.0142 | 0.8842±0.0250 |
| 10  | 56.8±2.0494  | 62     | 0.9161±0.0331 | 0.9666±0.0108 | 0.9385±0.0644 | 0.9102±0.0310 | 0.8852±0.0444 |
| 11  | 51.2±1.3038  | 54     | 0.9481±0.0241 | 0.9714±0.0239 | 0.9333±0.0697 | 0.9524±0.0168 | 0.9274±0.0343 |
| 12  | 46.8±0.4472  | 50     | 0.9360±0.0089 | 0.9741±0.0135 | 0.9000±0.0373 | 0.9474±0.0186 | 0.9143±0.0104 |
| 13  | 41.2±0.4472  | 44     | 0.9364±0.0102 | 0.9392±0.0273 | 0.8500±0.0559 | 0.9556±0.0248 | 0.8955±0.0109 |
| 14  | 34.4±0.5477  | 37     | 0.9297±0.0148 | 0.9789±0.0065 | 0.9000±0.0559 | 0.9379±0.0154 | 0.9006±0.0209 |
| 15  | 28.2±0.4472  | 31     | 0.9097±0.0144 | 0.8887±0.0142 | 0.8571±0.0000 | 0.9250±0.0186 | 0.8760±0.0177 |
| 16  | 25.2±0.4472  | 28     | 0.9000±0.0160 | 0.9497±0.0182 | 0.9143±0.0782 | 0.8952±0.0213 | 0.8752±0.0213 |
| 17  | 22.0±0.0000  | 23     | 0.9565±0.0000 | 0.9735±0.0132 | 1.0000±0.0000 | 0.9412±0.0000 | 0.9464±0.0000 |
| 18  | 15.0±0.0000  | 16     | 0.9375±0.0000 | 0.9479±0.0104 | 1.0000±0.0000 | 0.9167±0.0000 | 0.9227±0.0000 |
| 19  | 10.2±0.4472  | 11     | 0.9273±0.0407 | 0.9964±0.0080 | 1.0000±0.0000 | 0.8857±0.0639 | 0.9248±0.0420 |
| 20  | 9.0±0.0000   | 10     | 0.9000±0.0000 | 0.9333±0.0342 | 1.0000±0.0000 | 0.8333±0.0000 | 0.8990±0.0000 |

Table 53: HM RNN-Ensemble-F1, using accuracy to choose models. Predictions from admission.

| Day | Corrects     | Totals | Accuracy      | AUC           | Sensitivity   | Specificity   | F1            |
|-----|--------------|--------|---------------|---------------|---------------|---------------|---------------|
| 1   | 185.6±1.5166 | 194    | 0.9567±0.0078 | 0.9761±0.0096 | 0.9152±0.0136 | 0.9652±0.0094 | 0.9259±0.0121 |
| 2   | 181.8±1.0954 | 194    | 0.9371±0.0056 | 0.9277±0.0094 | 0.8000±0.0166 | 0.9652±0.0071 | 0.8873±0.0089 |
| 3   | 174.8±1.4832 | 187    | 0.9348±0.0079 | 0.9172±0.0012 | 0.8067±0.0279 | 0.9592±0.0057 | 0.8799±0.0147 |
| 4   | 167.6±1.1402 | 180    | 0.9311±0.0063 | 0.9359±0.0121 | 0.8000±0.0289 | 0.9563±0.0111 | 0.8741±0.0088 |
| 5   | 146.6±0.5477 | 160    | 0.9163±0.0034 | 0.8833±0.0134 | 0.7259±0.0422 | 0.9549±0.0075 | 0.8474±0.0089 |
| 6   | 130.4±0.8944 | 142    | 0.9183±0.0063 | 0.8972±0.0133 | 0.7280±0.0522 | 0.9590±0.0072 | 0.8543±0.0142 |
| 7   | 107.6±0.8944 | 117    | 0.9197±0.0076 | 0.8989±0.0107 | 0.8000±0.0238 | 0.9489±0.0117 | 0.8733±0.0104 |
| 8   | 89.4±0.5477  | 100    | 0.8940±0.0055 | 0.8643±0.0046 | 0.7474±0.0440 | 0.9284±0.0135 | 0.8311±0.0077 |
| 9   | 70.2±1.9235  | 79     | 0.8886±0.0243 | 0.9116±0.0172 | 0.8000±0.0523 | 0.9111±0.0309 | 0.8369±0.0296 |
| 10  | 55.6±2.7019  | 62     | 0.8968±0.0436 | 0.9278±0.0099 | 0.8769±0.0688 | 0.9020±0.0465 | 0.8582±0.0579 |
| 11  | 48.6±0.8944  | 54     | 0.9000±0.0166 | 0.9177±0.0192 | 0.8333±0.0000 | 0.9190±0.0213 | 0.8614±0.0200 |
| 12  | 42.4±1.3416  | 50     | 0.8480±0.0268 | 0.8366±0.0198 | 0.6000±0.0373 | 0.9263±0.0343 | 0.7791±0.0303 |
| 13  | 37.0±1.0000  | 44     | 0.8409±0.0227 | 0.8413±0.0320 | 0.6000±0.1046 | 0.8944±0.0304 | 0.7391±0.0355 |
| 14  | 30.0±0.7071  | 37     | 0.8108±0.0191 | 0.8082±0.0258 | 0.7250±0.0559 | 0.8345±0.0154 | 0.7485±0.0264 |
| 15  | 24.0±0.7071  | 31     | 0.7742±0.0228 | 0.7810±0.0585 | 0.5714±0.0000 | 0.8333±0.0295 | 0.6926±0.0213 |
| 16  | 21.4±1.5166  | 28     | 0.7643±0.0542 | 0.7347±0.0606 | 0.3143±0.1195 | 0.9143±0.0398 | 0.6257±0.0869 |
| 17  | 17.4±1.6733  | 23     | 0.7565±0.0728 | 0.6892±0.0476 | 0.3000±0.2472 | 0.9176±0.0322 | 0.6038±0.1540 |
| 18  | 11.8±0.4472  | 16     | 0.7375±0.0280 | 0.6729±0.0587 | 0.3500±0.1369 | 0.8667±0.0456 | 0.6111±0.0542 |
| 19  | 7.0±0.0000   | 11     | 0.6364±0.0000 | 0.7071±0.0889 | 0.5000±0.0000 | 0.7143±0.0000 | 0.6071±0.0000 |
| 20  | 7.2±0.4472   | 10     | 0.7200±0.0447 | 0.7333±0.0559 | 0.5000±0.0000 | 0.8667±0.0745 | 0.6886±0.0410 |

Table 54: HM RNN-Ensemble-F1, using accuracy to choose models. Predictions from outcome.

| Day | Corrects     | Totals | Accuracy      | AUC           | Sensitivity   | Specificity   | F1            |
|-----|--------------|--------|---------------|---------------|---------------|---------------|---------------|
| 1   | 185.6±1.5166 | 194    | 0.9567±0.0078 | 0.9761±0.0096 | 0.9152±0.0136 | 0.9652±0.0094 | 0.9259±0.0121 |
| 2   | 181.8±1.0954 | 194    | 0.9371±0.0056 | 0.9277±0.0094 | 0.8000±0.0166 | 0.9652±0.0071 | 0.8873±0.0089 |
| 3   | 174.8±1.4832 | 187    | 0.9348±0.0079 | 0.9172±0.0012 | 0.8067±0.0279 | 0.9592±0.0057 | 0.8799±0.0147 |
| 4   | 167.6±1.1402 | 180    | 0.9311±0.0063 | 0.9359±0.0121 | 0.8000±0.0289 | 0.9563±0.0111 | 0.8741±0.0088 |
| 5   | 146.6±0.5477 | 160    | 0.9163±0.0034 | 0.8833±0.0134 | 0.7259±0.0422 | 0.9549±0.0075 | 0.8474±0.0089 |
| 6   | 130.4±0.8944 | 142    | 0.9183±0.0063 | 0.8972±0.0133 | 0.7280±0.0522 | 0.9590±0.0072 | 0.8543±0.0142 |
| 7   | 107.6±0.8944 | 117    | 0.9197±0.0076 | 0.8989±0.0107 | 0.8000±0.0238 | 0.9489±0.0117 | 0.8733±0.0104 |
| 8   | 89.4±0.5477  | 100    | 0.8940±0.0055 | 0.8643±0.0046 | 0.7474±0.0440 | 0.9284±0.0135 | 0.8311±0.0077 |
| 9   | 70.2±1.9235  | 79     | 0.8886±0.0243 | 0.9116±0.0172 | 0.8000±0.0523 | 0.9111±0.0309 | 0.8369±0.0296 |
| 10  | 55.6±2.7019  | 62     | 0.8968±0.0436 | 0.9278±0.0099 | 0.8769±0.0688 | 0.9020±0.0465 | 0.8582±0.0579 |
| 11  | 48.6±0.8944  | 54     | 0.9000±0.0166 | 0.9177±0.0192 | 0.8333±0.0000 | 0.9190±0.0213 | 0.8614±0.0200 |
| 12  | 42.4±1.3416  | 50     | 0.8480±0.0268 | 0.8366±0.0198 | 0.6000±0.0373 | 0.9263±0.0343 | 0.7791±0.0303 |
| 13  | 37.0±1.0000  | 44     | 0.8409±0.0227 | 0.8413±0.0320 | 0.6000±0.1046 | 0.8944±0.0304 | 0.7391±0.0355 |
| 14  | 30.0±0.7071  | 37     | 0.8108±0.0191 | 0.8082±0.0258 | 0.7250±0.0559 | 0.8345±0.0154 | 0.7485±0.0264 |
| 15  | 24.0±0.7071  | 31     | 0.7742±0.0228 | 0.7810±0.0585 | 0.5714±0.0000 | 0.8333±0.0295 | 0.6926±0.0213 |
| 16  | 21.4±1.5166  | 28     | 0.7643±0.0542 | 0.7347±0.0606 | 0.3143±0.1195 | 0.9143±0.0398 | 0.6257±0.0869 |
| 17  | 17.4±1.6733  | 23     | 0.7565±0.0728 | 0.6892±0.0476 | 0.3000±0.2472 | 0.9176±0.0322 | 0.6038±0.1540 |
| 18  | 11.8±0.4472  | 16     | 0.7375±0.0280 | 0.6729±0.0587 | 0.3500±0.1369 | 0.8667±0.0456 | 0.6111±0.0542 |
| 19  | 7.0±0.0000   | 11     | 0.6364±0.0000 | 0.7071±0.0889 | 0.5000±0.0000 | 0.7143±0.0000 | 0.6071±0.0000 |
| 20  | 7.2±0.4472   | 10     | 0.7200±0.0447 | 0.7333±0.0559 | 0.5000±0.0000 | 0.8667±0.0745 | 0.6886±0.0410 |

Table 55: HM RNN-Ensemble-F1, using F1 to choose models. Predictions from admission.

| Day | Corrects     | Totals | Accuracy      | AUC           | Sensitivity   | Specificity   | F1            |
|-----|--------------|--------|---------------|---------------|---------------|---------------|---------------|
| 1   | 185.6±1.1402 | 194    | 0.9567±0.0059 | 0.9690±0.0046 | 0.9333±0.0254 | 0.9615±0.0111 | 0.9269±0.0082 |
| 2   | 181.0±1.8708 | 194    | 0.9330±0.0096 | 0.9233±0.0074 | 0.7939±0.0395 | 0.9615±0.0052 | 0.8803±0.0180 |
| 3   | 174.2±1.6432 | 187    | 0.9316±0.0088 | 0.9164±0.0015 | 0.8133±0.0447 | 0.9541±0.0094 | 0.8755±0.0163 |
| 4   | 167.6±1.3416 | 180    | 0.9311±0.0075 | 0.9306±0.0145 | 0.8345±0.0154 | 0.9497±0.0076 | 0.8774±0.0120 |
| 5   | 145.6±1.5166 | 160    | 0.9100±0.0095 | 0.8749±0.0097 | 0.7333±0.0310 | 0.9459±0.0112 | 0.8397±0.0149 |
| 6   | 129.0±0.7071 | 142    | 0.9085±0.0050 | 0.8806±0.0248 | 0.7600±0.0283 | 0.9402±0.0105 | 0.8447±0.0059 |
| 7   | 106.4±1.5166 | 117    | 0.9094±0.0130 | 0.8976±0.0105 | 0.8087±0.0496 | 0.9340±0.0265 | 0.8609±0.0130 |
| 8   | 89.0±0.7071  | 100    | 0.8900±0.0071 | 0.8676±0.0106 | 0.7368±0.0372 | 0.9259±0.0087 | 0.8247±0.0119 |
| 9   | 69.2±1.3038  | 79     | 0.8759±0.0165 | 0.8966±0.0207 | 0.7875±0.0342 | 0.8984±0.0241 | 0.8204±0.0182 |
| 10  | 55.2±1.6432  | 62     | 0.8903±0.0265 | 0.9171±0.0126 | 0.8615±0.0344 | 0.8980±0.0323 | 0.8484±0.0317 |
| 11  | 47.4±1.1402  | 54     | 0.8778±0.0211 | 0.9042±0.0180 | 0.8333±0.0589 | 0.8905±0.0130 | 0.8353±0.0293 |
| 12  | 42.0±1.5811  | 50     | 0.8400±0.0316 | 0.8237±0.0266 | 0.6500±0.0373 | 0.9000±0.0343 | 0.7788±0.0383 |
| 13  | 37.2±1.0954  | 44     | 0.8455±0.0249 | 0.8326±0.0259 | 0.7000±0.0685 | 0.8778±0.0248 | 0.7627±0.0358 |
| 14  | 28.8±1.0954  | 37     | 0.7784±0.0296 | 0.8108±0.0490 | 0.7250±0.0559 | 0.7931±0.0244 | 0.7175±0.0354 |
| 15  | 23.6±1.6733  | 31     | 0.7613±0.0540 | 0.7923±0.0340 | 0.6000±0.0639 | 0.8083±0.0697 | 0.6872±0.0527 |
| 16  | 21.0±1.8708  | 28     | 0.7500±0.0668 | 0.6755±0.0577 | 0.4571±0.2119 | 0.8476±0.0522 | 0.6499±0.1107 |
| 17  | 17.2±0.8367  | 23     | 0.7478±0.0364 | 0.6902±0.0992 | 0.3333±0.1179 | 0.8941±0.0644 | 0.6190±0.0495 |
| 18  | 11.0±1.0000  | 16     | 0.6875±0.0625 | 0.5813±0.0677 | 0.3000±0.1118 | 0.8167±0.0697 | 0.5599±0.0703 |
| 19  | 7.2±0.4472   | 11     | 0.6545±0.0407 | 0.6893±0.0573 | 0.5500±0.1118 | 0.7143±0.0000 | 0.6293±0.0496 |
| 20  | 7.2±0.4472   | 10     | 0.7200±0.0447 | 0.7542±0.0632 | 0.5500±0.1118 | 0.8333±0.0000 | 0.6946±0.0543 |

Table 56: HM RNN-Ensemble-F1, using F1 to choose models. Predictions from outcome.

| Day | Corrects     | Totals | Accuracy      | AUC           | Sensitivity   | Specificity   | F1            |
|-----|--------------|--------|---------------|---------------|---------------|---------------|---------------|
| 1   | 164.0±2.0000 | 194    | 0.8454±0.0103 | 0.7599±0.0245 | 0.6061±0.0525 | 0.8944±0.0176 | 0.7383±0.0139 |
| 2   | 163.8±2.1679 | 194    | 0.8443±0.0112 | 0.7790±0.0235 | 0.6364±0.0567 | 0.8870±0.0155 | 0.7428±0.0180 |
| 3   | 160.6±2.0736 | 187    | 0.8588±0.0111 | 0.8469±0.0035 | 0.7667±0.0000 | 0.8764±0.0132 | 0.7741±0.0126 |
| 4   | 160.4±0.5477 | 180    | 0.8911±0.0030 | 0.8799±0.0086 | 0.8000±0.0154 | 0.9086±0.0055 | 0.8182±0.0036 |
| 5   | 146.4±0.8944 | 160    | 0.9150±0.0056 | 0.9119±0.0064 | 0.8593±0.0166 | 0.9263±0.0063 | 0.8605±0.0082 |
| 6   | 129.2±1.6432 | 142    | 0.9099±0.0116 | 0.9354±0.0216 | 0.9040±0.0456 | 0.9111±0.0047 | 0.8612±0.0189 |
| 7   | 107.4±0.8944 | 117    | 0.9179±0.0076 | 0.9556±0.0128 | 0.9391±0.0238 | 0.9128±0.0089 | 0.8826±0.0105 |
| 8   | 91.0±1.8708  | 100    | 0.9100±0.0187 | 0.9511±0.0036 | 0.9474±0.0000 | 0.9012±0.0231 | 0.8714±0.0227 |
| 9   | 72.2±1.3038  | 79     | 0.9139±0.0165 | 0.9496±0.0041 | 0.9375±0.0000 | 0.9079±0.0207 | 0.8799±0.0203 |
| 10  | 55.4±1.8166  | 62     | 0.8935±0.0293 | 0.9666±0.0108 | 1.0000±0.0000 | 0.8653±0.0371 | 0.8635±0.0332 |
| 11  | 50.2±0.8367  | 54     | 0.9296±0.0155 | 0.9714±0.0239 | 0.9833±0.0373 | 0.9143±0.0130 | 0.9071±0.0204 |
| 12  | 46.4±0.5477  | 50     | 0.9280±0.0110 | 0.9741±0.0135 | 0.9833±0.0373 | 0.9105±0.0235 | 0.9093±0.0117 |
| 13  | 40.0±0.7071  | 44     | 0.9091±0.0161 | 0.9392±0.0273 | 0.9000±0.0559 | 0.9111±0.0232 | 0.8628±0.0211 |
| 14  | 34.2±0.8367  | 37     | 0.9243±0.0226 | 0.9789±0.0065 | 1.0000±0.0000 | 0.9034±0.0289 | 0.9007±0.0267 |
| 15  | 28.0±0.0000  | 31     | 0.9032±0.0000 | 0.8887±0.0142 | 0.8571±0.0000 | 0.9167±0.0000 | 0.8681±0.0000 |
| 16  | 24.8±0.8367  | 28     | 0.8857±0.0299 | 0.9497±0.0182 | 1.0000±0.0000 | 0.8476±0.0398 | 0.8663±0.0318 |
| 17  | 21.8±0.4472  | 23     | 0.9478±0.0194 | 0.9735±0.0132 | 1.0000±0.0000 | 0.9294±0.0263 | 0.9366±0.0219 |
| 18  | 14.6±0.5477  | 16     | 0.9125±0.0342 | 0.9479±0.0104 | 1.0000±0.0000 | 0.8833±0.0456 | 0.8954±0.0373 |
| 19  | 10.0±0.0000  | 11     | 0.9091±0.0000 | 0.9964±0.0080 | 1.0000±0.0000 | 0.8571±0.0000 | 0.9060±0.0000 |
| 20  | 8.8±0.4472   | 10     | 0.8800±0.0447 | 0.9333±0.0342 | 1.0000±0.0000 | 0.8000±0.0745 | 0.8792±0.0443 |

Table 57: HM RNN-Ensemble-SEN, using accuracy to choose models. Predictions from admission.

| Day | Corrects     | Totals | Accuracy      | AUC           | Sensitivity   | Specificity   | F1            |
|-----|--------------|--------|---------------|---------------|---------------|---------------|---------------|
| 1   | 181.8±2.5884 | 194    | 0.9371±0.0133 | 0.9761±0.0096 | 0.9758±0.0254 | 0.9292±0.0209 | 0.9013±0.0176 |
| 2   | 180.6±1.8166 | 194    | 0.9309±0.0094 | 0.9277±0.0094 | 0.8788±0.0214 | 0.9416±0.0094 | 0.8851±0.0145 |
| 3   | 173.8±1.0954 | 187    | 0.9294±0.0059 | 0.9172±0.0012 | 0.8667±0.0000 | 0.9414±0.0070 | 0.8775±0.0086 |
| 4   | 166.2±1.7889 | 180    | 0.9233±0.0099 | 0.9359±0.0121 | 0.8966±0.0244 | 0.9285±0.0086 | 0.8718±0.0157 |
| 5   | 146.0±1.7321 | 160    | 0.9125±0.0108 | 0.8833±0.0134 | 0.8074±0.0310 | 0.9338±0.0112 | 0.8519±0.0166 |
| 6   | 129.4±0.8944 | 142    | 0.9113±0.0063 | 0.8972±0.0133 | 0.8400±0.0283 | 0.9265±0.0076 | 0.8571±0.0097 |
| 7   | 104.6±2.3022 | 117    | 0.8940±0.0197 | 0.8989±0.0107 | 0.8435±0.0238 | 0.9064±0.0254 | 0.8455±0.0239 |
| 8   | 88.8±0.8367  | 100    | 0.8880±0.0084 | 0.8643±0.0046 | 0.7895±0.0000 | 0.9111±0.0103 | 0.8289±0.0103 |
| 9   | 68.6±1.6733  | 79     | 0.8684±0.0212 | 0.9116±0.0172 | 0.9125±0.0559 | 0.8571±0.0317 | 0.8250±0.0233 |
| 10  | 52.6±1.3416  | 62     | 0.8484±0.0216 | 0.9278±0.0099 | 0.9231±0.0000 | 0.8286±0.0274 | 0.8078±0.0227 |
| 11  | 45.8±1.7889  | 54     | 0.8481±0.0331 | 0.9177±0.0192 | 0.9000±0.0373 | 0.8333±0.0376 | 0.8106±0.0367 |
| 12  | 40.4±1.3416  | 50     | 0.8080±0.0268 | 0.8366±0.0198 | 0.7833±0.0456 | 0.8158±0.0372 | 0.7641±0.0271 |
| 13  | 36.2±0.8367  | 44     | 0.8227±0.0190 | 0.8413±0.0320 | 0.8250±0.0685 | 0.8222±0.0317 | 0.7560±0.0185 |
| 14  | 27.8±1.0954  | 37     | 0.7514±0.0296 | 0.8082±0.0258 | 0.8000±0.0685 | 0.7379±0.0463 | 0.7023±0.0261 |
| 15  | 22.6±1.5166  | 31     | 0.7290±0.0489 | 0.7810±0.0585 | 0.7429±0.1195 | 0.7250±0.0475 | 0.6790±0.0557 |
| 16  | 21.0±0.7071  | 28     | 0.7500±0.0253 | 0.7347±0.0606 | 0.6571±0.1278 | 0.7810±0.0261 | 0.6943±0.0388 |
| 17  | 17.2±0.8367  | 23     | 0.7478±0.0364 | 0.6892±0.0476 | 0.5333±0.0745 | 0.8235±0.0416 | 0.6763±0.0412 |
| 18  | 11.0±0.7071  | 16     | 0.6875±0.0442 | 0.6729±0.0587 | 0.6000±0.1369 | 0.7167±0.0456 | 0.6307±0.0542 |
| 19  | 7.6±0.5477   | 11     | 0.6909±0.0498 | 0.7071±0.0889 | 0.6500±0.1369 | 0.7143±0.0000 | 0.6736±0.0607 |
| 20  | 7.2±0.4472   | 10     | 0.7200±0.0447 | 0.7333±0.0559 | 0.5500±0.1118 | 0.8333±0.0000 | 0.6946±0.0543 |

Table 58: HM RNN-Ensemble-SEN, using accuracy to choose models. Predictions from outcome.

| Day | Corrects     | Totals | Accuracy      | AUC           | Sensitivity   | Specificity   | F1            |
|-----|--------------|--------|---------------|---------------|---------------|---------------|---------------|
| 1   | 162.4±4.2778 | 194    | 0.8371±0.0221 | 0.7692±0.0255 | 0.6364±0.0429 | 0.8783±0.0251 | 0.7355±0.0274 |
| 2   | 164.2±1.7889 | 194    | 0.8464±0.0092 | 0.7851±0.0154 | 0.6545±0.0346 | 0.8857±0.0094 | 0.7485±0.0146 |
| 3   | 159.0±0.7071 | 187    | 0.8503±0.0038 | 0.8345±0.0122 | 0.7467±0.0298 | 0.8701±0.0073 | 0.7611±0.0062 |
| 4   | 158.2±1.7889 | 180    | 0.8789±0.0099 | 0.8734±0.0212 | 0.7931±0.0422 | 0.8954±0.0109 | 0.8019±0.0158 |
| 5   | 145.4±1.5166 | 160    | 0.9088±0.0095 | 0.9040±0.0144 | 0.8444±0.0310 | 0.9218±0.0114 | 0.8507±0.0141 |
| 6   | 127.8±1.3038 | 142    | 0.9000±0.0092 | 0.9405±0.0131 | 0.9200±0.0283 | 0.8957±0.0094 | 0.8504±0.0130 |
| 7   | 106.2±0.8367 | 117    | 0.9077±0.0072 | 0.9492±0.0121 | 0.9304±0.0238 | 0.9021±0.0089 | 0.8693±0.0095 |
| 8   | 89.8±1.3038  | 100    | 0.8980±0.0130 | 0.9430±0.0079 | 0.9368±0.0235 | 0.8889±0.0195 | 0.8558±0.0145 |
| 9   | 71.0±1.4142  | 79     | 0.8987±0.0179 | 0.9340±0.0150 | 0.9125±0.0342 | 0.8952±0.0241 | 0.8597±0.0211 |
| 10  | 55.4±1.5166  | 62     | 0.8935±0.0245 | 0.9648±0.0100 | 1.0000±0.0000 | 0.8653±0.0310 | 0.8633±0.0283 |
| 11  | 49.6±1.1402  | 54     | 0.9185±0.0211 | 0.9591±0.0262 | 0.9667±0.0456 | 0.9048±0.0238 | 0.8931±0.0263 |
| 12  | 45.8±0.8367  | 50     | 0.9160±0.0167 | 0.9649±0.0241 | 0.9667±0.0456 | 0.9000±0.0343 | 0.8948±0.0173 |
| 13  | 40.2±0.4472  | 44     | 0.9136±0.0102 | 0.9497±0.0313 | 0.9250±0.0685 | 0.9111±0.0232 | 0.8705±0.0124 |
| 14  | 33.8±0.8367  | 37     | 0.9135±0.0226 | 0.9608±0.0265 | 0.9750±0.0559 | 0.8966±0.0345 | 0.8863±0.0263 |
| 15  | 28.0±0.0000  | 31     | 0.9032±0.0000 | 0.8875±0.0074 | 0.8571±0.0000 | 0.9167±0.0000 | 0.8681±0.0000 |
| 16  | 24.4±1.1402  | 28     | 0.8714±0.0407 | 0.9286±0.0457 | 0.9429±0.0782 | 0.8476±0.0398 | 0.8472±0.0473 |
| 17  | 21.8±0.4472  | 23     | 0.9478±0.0194 | 0.9637±0.0102 | 1.0000±0.0000 | 0.9294±0.0263 | 0.9366±0.0219 |
| 18  | 14.6±0.5477  | 16     | 0.9125±0.0342 | 0.9562±0.0186 | 1.0000±0.0000 | 0.8833±0.0456 | 0.8954±0.0373 |
| 19  | 10.0±0.0000  | 11     | 0.9091±0.0000 | 0.9964±0.0080 | 1.0000±0.0000 | 0.8571±0.0000 | 0.9060±0.0000 |
| 20  | 8.8±0.4472   | 10     | 0.8800±0.0447 | 0.9458±0.0280 | 1.0000±0.0000 | 0.8000±0.0745 | 0.8792±0.0443 |

Table 59: HM RNN-Ensemble-SEN, using F1 to choose models. Predictions from admission.



| Day | Corrects     | Totals | Accuracy      | AUC           | Sensitivity   | Specificity   | F1            |
|-----|--------------|--------|---------------|---------------|---------------|---------------|---------------|
| 1   | 181.6±3.2863 | 194    | 0.9361±0.0169 | 0.9817±0.0065 | 0.9879±0.0166 | 0.9255±0.0232 | 0.9008±0.0233 |
| 2   | 180.6±1.5166 | 194    | 0.9309±0.0078 | 0.9319±0.0095 | 0.8909±0.0166 | 0.9391±0.0081 | 0.8861±0.0119 |
| 3   | 173.2±0.8367 | 187    | 0.9262±0.0045 | 0.9172±0.0013 | 0.8667±0.0000 | 0.9376±0.0053 | 0.8728±0.0064 |
| 4   | 165.2±2.0494 | 180    | 0.9178±0.0114 | 0.9302±0.0143 | 0.8897±0.0289 | 0.9232±0.0100 | 0.8634±0.0176 |
| 5   | 144.8±1.6432 | 160    | 0.9050±0.0103 | 0.8757±0.0100 | 0.7926±0.0203 | 0.9278±0.0114 | 0.8401±0.0146 |
| 6   | 128.2±2.1679 | 142    | 0.9028±0.0153 | 0.8813±0.0261 | 0.8080±0.0522 | 0.9231±0.0105 | 0.8426±0.0250 |
| 7   | 104.0±2.0000 | 117    | 0.8889±0.0171 | 0.8974±0.0096 | 0.8435±0.0238 | 0.9000±0.0256 | 0.8393±0.0192 |
| 8   | 88.6±0.5477  | 100    | 0.8860±0.0055 | 0.8682±0.0096 | 0.8000±0.0235 | 0.9062±0.0068 | 0.8276±0.0080 |
| 9   | 67.8±1.0954  | 79     | 0.8582±0.0139 | 0.9042±0.0224 | 0.9125±0.0559 | 0.8444±0.0235 | 0.8137±0.0152 |
| 10  | 50.4±1.1402  | 62     | 0.8129±0.0184 | 0.9146±0.0055 | 0.9231±0.0000 | 0.7837±0.0233 | 0.7717±0.0182 |
| 11  | 44.6±1.9494  | 54     | 0.8259±0.0361 | 0.9010±0.0230 | 0.8833±0.0456 | 0.8095±0.0337 | 0.7862±0.0405 |
| 12  | 39.2±1.3038  | 50     | 0.7840±0.0261 | 0.8169±0.0258 | 0.7667±0.0697 | 0.7895±0.0186 | 0.7386±0.0328 |
| 13  | 34.6±0.8944  | 44     | 0.7864±0.0203 | 0.8229±0.0303 | 0.8000±0.0685 | 0.7833±0.0304 | 0.7168±0.0208 |
| 14  | 28.0±1.2247  | 37     | 0.7568±0.0331 | 0.8194±0.0534 | 0.8250±0.1425 | 0.7379±0.0189 | 0.7092±0.0466 |
| 15  | 22.4±1.1402  | 31     | 0.7226±0.0368 | 0.7881±0.0393 | 0.7714±0.0782 | 0.7083±0.0295 | 0.6774±0.0414 |
| 16  | 19.6±1.6733  | 28     | 0.7000±0.0598 | 0.6830±0.0444 | 0.5714±0.1010 | 0.7429±0.0722 | 0.6376±0.0602 |
| 17  | 17.4±1.3416  | 23     | 0.7565±0.0583 | 0.6980±0.1153 | 0.5667±0.2528 | 0.8235±0.0416 | 0.6799±0.1099 |
| 18  | 10.8±1.4832  | 16     | 0.6750±0.0927 | 0.6292±0.1014 | 0.5000±0.1768 | 0.7333±0.0697 | 0.6035±0.1116 |
| 19  | 7.8±0.8367   | 11     | 0.7091±0.0761 | 0.7107±0.0719 | 0.7000±0.2092 | 0.7143±0.0000 | 0.6934±0.0884 |
| 20  | 7.6±0.5477   | 10     | 0.7600±0.0548 | 0.7750±0.0614 | 0.6500±0.1369 | 0.8333±0.0000 | 0.7431±0.0665 |

Table 60: HM RNN-Ensemble-SEN, using F1 to choose models. Predictions from outcome.

### 3 H12O

#### 3.1 Random Forest Daily Results

| Day | Corrects     | Totals | Accuracy      | AUC           | Sensitivity   | Specificity   | F1            |
|-----|--------------|--------|---------------|---------------|---------------|---------------|---------------|
| 1   | 335.2±2.3875 | 374    | 0.8963±0.0064 | 0.6763±0.0070 | 0.3760±0.0089 | 0.9765±0.0064 | 0.7174±0.0119 |
| 2   | 335.6±1.8166 | 374    | 0.8973±0.0049 | 0.6735±0.0074 | 0.3680±0.0110 | 0.9790±0.0040 | 0.7162±0.0109 |
| 3   | 341.6±1.3416 | 374    | 0.9134±0.0036 | 0.7453±0.0127 | 0.5160±0.0261 | 0.9747±0.0026 | 0.7826±0.0111 |
| 4   | 338.0±1.2247 | 364    | 0.9286±0.0034 | 0.7705±0.0114 | 0.5574±0.0233 | 0.9836±0.0026 | 0.8141±0.0100 |
| 5   | 312.2±1.3038 | 332    | 0.9404±0.0039 | 0.7884±0.0087 | 0.5897±0.0181 | 0.9870±0.0044 | 0.8330±0.0093 |
| 6   | 274.2±0.4472 | 291    | 0.9423±0.0015 | 0.8040±0.0106 | 0.6235±0.0246 | 0.9844±0.0039 | 0.8420±0.0048 |
| 7   | 232.4±0.8944 | 250    | 0.9296±0.0036 | 0.7924±0.0085 | 0.6138±0.0154 | 0.9710±0.0025 | 0.8149±0.0092 |
| 8   | 188.8±1.4832 | 201    | 0.9393±0.0074 | 0.8215±0.0168 | 0.6667±0.0295 | 0.9763±0.0047 | 0.8450±0.0185 |
| 9   | 147.0±1.5811 | 159    | 0.9245±0.0099 | 0.7870±0.0286 | 0.6000±0.0543 | 0.9739±0.0040 | 0.8170±0.0270 |
| 10  | 124.6±0.8944 | 133    | 0.9368±0.0067 | 0.8022±0.0222 | 0.6250±0.0442 | 0.9795±0.0047 | 0.8342±0.0193 |
| 11  | 108.2±0.8367 | 117    | 0.9248±0.0072 | 0.7863±0.0041 | 0.6000±0.0000 | 0.9725±0.0082 | 0.8148±0.0125 |
| 12  | 91.2±1.0954  | 99     | 0.9212±0.0111 | 0.7784±0.0243 | 0.5846±0.0421 | 0.9721±0.0064 | 0.8081±0.0269 |
| 13  | 82.8±0.8367  | 91     | 0.9099±0.0092 | 0.8321±0.0219 | 0.7231±0.0421 | 0.9410±0.0070 | 0.8216±0.0186 |
| 14  | 71.0±1.0000  | 75     | 0.9467±0.0133 | 0.9345±0.0079 | 0.9167±0.0000 | 0.9524±0.0159 | 0.9074±0.0205 |
| 15  | 62.4±0.5477  | 67     | 0.9313±0.0082 | 0.8859±0.0049 | 0.8182±0.0000 | 0.9536±0.0098 | 0.8778±0.0123 |
| 16  | 54.8±0.4472  | 59     | 0.9288±0.0076 | 0.8696±0.0224 | 0.7800±0.0447 | 0.9592±0.0000 | 0.8723±0.0163 |
| 17  | 52.8±0.8367  | 54     | 0.9778±0.0155 | 0.9333±0.0465 | 0.8667±0.0930 | 1.0000±0.0000 | 0.9567±0.0309 |
| 18  | 41.4±0.8944  | 45     | 0.9200±0.0199 | 0.9024±0.0121 | 0.8750±0.0000 | 0.9297±0.0242 | 0.8736±0.0261 |
| 19  | 35.8±0.4472  | 38     | 0.9421±0.0118 | 0.8979±0.0070 | 0.8333±0.0000 | 0.9625±0.0140 | 0.8930±0.0180 |
| 20  | 30.8±0.4472  | 35     | 0.8800±0.0128 | 0.8483±0.0373 | 0.8000±0.0745 | 0.8966±0.0000 | 0.8099±0.0258 |

Table 61: H12O Random Forest baseline results of CV using base features, taking best model of grid using accuracy. Predictions from admission.

| Day | Corrects     | Totals | Accuracy      | AUC           | Sensitivity   | Specificity   | F1            |
|-----|--------------|--------|---------------|---------------|---------------|---------------|---------------|
| 1   | 357.2±0.8367 | 374    | 0.9551±0.0022 | 0.8861±0.0044 | 0.7920±0.0110 | 0.9802±0.0035 | 0.8996±0.0040 |
| 2   | 361.2±1.4832 | 374    | 0.9658±0.0040 | 0.8991±0.0119 | 0.8080±0.0228 | 0.9901±0.0014 | 0.9218±0.0096 |
| 3   | 359.8±1.4832 | 374    | 0.9620±0.0040 | 0.8884±0.0095 | 0.7880±0.0179 | 0.9889±0.0028 | 0.9128±0.0091 |
| 4   | 350.6±1.1402 | 364    | 0.9632±0.0031 | 0.8701±0.0081 | 0.7447±0.0150 | 0.9956±0.0017 | 0.9093±0.0079 |
| 5   | 312.8±1.6432 | 332    | 0.9422±0.0049 | 0.7805±0.0189 | 0.5692±0.0380 | 0.9918±0.0031 | 0.8328±0.0169 |
| 6   | 271.4±1.5166 | 291    | 0.9326±0.0052 | 0.7475±0.0238 | 0.5059±0.0483 | 0.9891±0.0017 | 0.7995±0.0209 |
| 7   | 231.8±0.8367 | 250    | 0.9272±0.0033 | 0.7641±0.0108 | 0.5517±0.0244 | 0.9765±0.0050 | 0.7984±0.0080 |
| 8   | 181.8±0.8367 | 201    | 0.9045±0.0042 | 0.6828±0.0118 | 0.3917±0.0228 | 0.9740±0.0031 | 0.7209±0.0130 |
| 9   | 140.4±1.1402 | 159    | 0.8830±0.0072 | 0.6258±0.0106 | 0.2762±0.0213 | 0.9754±0.0083 | 0.6598±0.0146 |
| 10  | 118.6±0.5477 | 133    | 0.8917±0.0041 | 0.6417±0.0023 | 0.3125±0.0000 | 0.9709±0.0047 | 0.6752±0.0058 |
| 11  | 103.0±0.7071 | 117    | 0.8803±0.0060 | 0.6471±0.0236 | 0.3333±0.0471 | 0.9608±0.0000 | 0.6745±0.0249 |
| 12  | 85.2±1.6432  | 99     | 0.8606±0.0166 | 0.6521±0.0365 | 0.3692±0.0644 | 0.9349±0.0104 | 0.6656±0.0402 |
| 13  | 79.8±1.4832  | 91     | 0.8769±0.0163 | 0.6910±0.0258 | 0.4308±0.0421 | 0.9513±0.0140 | 0.7153±0.0324 |
| 14  | 65.0±0.0000  | 75     | 0.8667±0.0000 | 0.6306±0.0185 | 0.2833±0.0456 | 0.9778±0.0087 | 0.6638±0.0187 |
| 15  | 59.4±1.3416  | 67     | 0.8866±0.0200 | 0.7714±0.0260 | 0.6000±0.0498 | 0.9429±0.0233 | 0.7842±0.0307 |
| 16  | 48.8±1.3038  | 59     | 0.8271±0.0221 | 0.6810±0.0466 | 0.4600±0.0894 | 0.9020±0.0171 | 0.6845±0.0432 |
| 17  | 44.4±0.8944  | 54     | 0.8222±0.0166 | 0.6089±0.0298 | 0.2889±0.0609 | 0.9289±0.0186 | 0.6234±0.0331 |
| 18  | 34.4±0.8944  | 45     | 0.7644±0.0199 | 0.5922±0.0336 | 0.3250±0.0685 | 0.8595±0.0226 | 0.5924±0.0323 |
| 19  | 28.4±1.1402  | 38     | 0.7474±0.0300 | 0.5792±0.0178 | 0.3333±0.0000 | 0.8250±0.0356 | 0.5708±0.0232 |
| 20  | 26.8±0.8367  | 35     | 0.7657±0.0239 | 0.5282±0.0144 | 0.1667±0.0000 | 0.8897±0.0289 | 0.5299±0.0163 |

Table 62: H12O Random Forest baseline results of CV using base features, taking best model of grid using accuracy. Predictions from outcome.

| Day | Corrects     | Totals | Accuracy      | AUC           | Sensitivity   | Specificity   | F1            |
|-----|--------------|--------|---------------|---------------|---------------|---------------|---------------|
| 1   | 332.6±1.3416 | 374    | 0.8893±0.0036 | 0.6824±0.0115 | 0.4000±0.0245 | 0.9648±0.0041 | 0.7145±0.0111 |
| 2   | 331.6±2.7019 | 374    | 0.8866±0.0072 | 0.6910±0.0105 | 0.4240±0.0167 | 0.9580±0.0068 | 0.7182±0.0138 |
| 3   | 336.0±1.0000 | 374    | 0.8984±0.0027 | 0.7485±0.0068 | 0.5440±0.0167 | 0.9531±0.0046 | 0.7654±0.0045 |
| 4   | 336.0±2.0000 | 364    | 0.9231±0.0055 | 0.7819±0.0149 | 0.5915±0.0277 | 0.9722±0.0026 | 0.8107±0.0144 |
| 5   | 309.2±2.2804 | 332    | 0.9313±0.0069 | 0.8077±0.0240 | 0.6462±0.0493 | 0.9693±0.0064 | 0.8248±0.0189 |
| 6   | 271.6±2.3022 | 291    | 0.9333±0.0079 | 0.8244±0.0123 | 0.6824±0.0246 | 0.9665±0.0090 | 0.8340±0.0155 |
| 7   | 231.0±0.7071 | 250    | 0.9240±0.0028 | 0.8222±0.0122 | 0.6897±0.0244 | 0.9548±0.0000 | 0.8174±0.0087 |
| 8   | 185.6±0.8944 | 201    | 0.9234±0.0044 | 0.8340±0.0172 | 0.7167±0.0349 | 0.9514±0.0031 | 0.8234±0.0121 |
| 9   | 146.6±0.8944 | 159    | 0.9220±0.0056 | 0.8097±0.0107 | 0.6571±0.0213 | 0.9623±0.0061 | 0.8227±0.0113 |
| 10  | 123.2±2.0494 | 133    | 0.9263±0.0154 | 0.8394±0.0234 | 0.7250±0.0342 | 0.9538±0.0130 | 0.8311±0.0310 |
| 11  | 103.4±0.8944 | 117    | 0.8838±0.0076 | 0.7627±0.0044 | 0.6000±0.0000 | 0.9255±0.0088 | 0.7514±0.0107 |
| 12  | 90.4±0.5477  | 99     | 0.9131±0.0055 | 0.7802±0.0298 | 0.6000±0.0644 | 0.9605±0.0064 | 0.7969±0.0196 |
| 13  | 81.6±0.8944  | 91     | 0.8967±0.0098 | 0.8115±0.0057 | 0.6923±0.0000 | 0.9308±0.0115 | 0.7983±0.0134 |
| 14  | 69.4±0.5477  | 75     | 0.9253±0.0073 | 0.9151±0.0173 | 0.9000±0.0373 | 0.9302±0.0087 | 0.8742±0.0122 |
| 15  | 61.6±0.5477  | 67     | 0.9194±0.0082 | 0.8787±0.0049 | 0.8182±0.0000 | 0.9393±0.0098 | 0.8604±0.0115 |
| 16  | 54.6±0.5477  | 59     | 0.9254±0.0093 | 0.8835±0.0207 | 0.8200±0.0447 | 0.9469±0.0112 | 0.8716±0.0154 |
| 17  | 50.8±0.4472  | 54     | 0.9407±0.0083 | 0.9378±0.0268 | 0.9333±0.0609 | 0.9422±0.0122 | 0.9017±0.0141 |
| 18  | 40.0±0.0000  | 45     | 0.8889±0.0000 | 0.8834±0.0000 | 0.8750±0.0000 | 0.8919±0.0000 | 0.8332±0.0000 |
| 19  | 36.0±0.7071  | 38     | 0.9474±0.0186 | 0.9146±0.0396 | 0.8667±0.0745 | 0.9625±0.0140 | 0.9035±0.0330 |
| 20  | 31.2±0.4472  | 35     | 0.8914±0.0128 | 0.8684±0.0077 | 0.8333±0.0000 | 0.9034±0.0154 | 0.8288±0.0165 |

Table 63: H12O Random Forest baseline results of CV using base features, taking best model of grid using F1. Predictions from admission.

| Day | Corrects     | Totals | Accuracy      | AUC           | Sensitivity   | Specificity   | F1            |
|-----|--------------|--------|---------------|---------------|---------------|---------------|---------------|
| 1   | 353.6±0.8944 | 374    | 0.9455±0.0024 | 0.8856±0.0035 | 0.8040±0.0089 | 0.9673±0.0035 | 0.8831±0.0040 |
| 2   | 361.2±1.9235 | 374    | 0.9658±0.0051 | 0.9041±0.0130 | 0.8200±0.0245 | 0.9883±0.0034 | 0.9227±0.0117 |
| 3   | 360.2±1.3038 | 374    | 0.9631±0.0035 | 0.9026±0.0073 | 0.8200±0.0141 | 0.9852±0.0034 | 0.9174±0.0074 |
| 4   | 348.4±0.5477 | 364    | 0.9571±0.0015 | 0.8848±0.0065 | 0.7872±0.0150 | 0.9823±0.0028 | 0.9007±0.0033 |
| 5   | 312.6±1.6733 | 332    | 0.9416±0.0050 | 0.8002±0.0164 | 0.6154±0.0314 | 0.9850±0.0019 | 0.8397±0.0152 |
| 6   | 272.8±0.8367 | 291    | 0.9375±0.0029 | 0.7757±0.0120 | 0.5647±0.0246 | 0.9868±0.0021 | 0.8218±0.0100 |
| 7   | 229.6±0.5477 | 250    | 0.9184±0.0022 | 0.7771±0.0135 | 0.5931±0.0289 | 0.9611±0.0025 | 0.7908±0.0089 |
| 8   | 178.2±1.3038 | 201    | 0.8866±0.0065 | 0.6871±0.0218 | 0.4250±0.0456 | 0.9492±0.0069 | 0.7040±0.0190 |
| 9   | 138.6±0.8944 | 159    | 0.8717±0.0056 | 0.6314±0.0261 | 0.3048±0.0543 | 0.9580±0.0032 | 0.6561±0.0272 |
| 10  | 116.2±1.3038 | 133    | 0.8737±0.0098 | 0.6530±0.0174 | 0.3625±0.0280 | 0.9436±0.0076 | 0.6691±0.0210 |
| 11  | 99.4±0.8944  | 117    | 0.8496±0.0076 | 0.6522±0.0167 | 0.3867±0.0298 | 0.9176±0.0054 | 0.6557±0.0170 |
| 12  | 84.4±0.8944  | 99     | 0.8525±0.0090 | 0.6866±0.0052 | 0.4615±0.0000 | 0.9116±0.0104 | 0.6832±0.0102 |
| 13  | 76.4±0.8944  | 91     | 0.8396±0.0098 | 0.7013±0.0206 | 0.5077±0.0421 | 0.8949±0.0107 | 0.6899±0.0174 |
| 14  | 63.6±0.8944  | 75     | 0.8480±0.0119 | 0.6734±0.0071 | 0.4167±0.0000 | 0.9302±0.0142 | 0.6896±0.0139 |
| 15  | 54.8±1.0954  | 67     | 0.8179±0.0163 | 0.7377±0.0182 | 0.6182±0.0407 | 0.8571±0.0219 | 0.7073±0.0178 |
| 16  | 47.6±1.5166  | 59     | 0.8068±0.0257 | 0.7086±0.0275 | 0.5600±0.0548 | 0.8571±0.0323 | 0.6884±0.0297 |
| 17  | 42.0±0.7071  | 54     | 0.7778±0.0131 | 0.6178±0.0256 | 0.3778±0.0609 | 0.8578±0.0199 | 0.6129±0.0212 |
| 18  | 31.8±1.3038  | 45     | 0.7067±0.0290 | 0.5473±0.0427 | 0.3000±0.0685 | 0.7946±0.0242 | 0.5418±0.0402 |
| 19  | 25.0±1.2247  | 38     | 0.6579±0.0322 | 0.5260±0.0191 | 0.3333±0.0000 | 0.7188±0.0383 | 0.5077±0.0210 |
| 20  | 26.0±0.0000  | 35     | 0.7429±0.0000 | 0.5144±0.0000 | 0.1667±0.0000 | 0.8621±0.0000 | 0.5146±0.0000 |

Table 64: H12O Random Forest baseline results of CV using base features, taking best model of grid using F1. Predictions from outcome.

| Day | Corrects     | Totals | Accuracy      | AUC           | Sensitivity   | Specificity   | F1            |
|-----|--------------|--------|---------------|---------------|---------------|---------------|---------------|
| 1   | 335.0±2.3452 | 374    | 0.8957±0.0063 | 0.6743±0.0197 | 0.3720±0.0390 | 0.9765±0.0035 | 0.7147±0.0216 |
| 2   | 340.0±1.0000 | 374    | 0.9091±0.0027 | 0.7124±0.0122 | 0.4440±0.0261 | 0.9809±0.0026 | 0.7576±0.0108 |
| 3   | 345.0±1.5811 | 374    | 0.9225±0.0042 | 0.7692±0.0150 | 0.5600±0.0316 | 0.9784±0.0044 | 0.8074±0.0122 |
| 4   | 336.8±1.7889 | 364    | 0.9253±0.0049 | 0.7831±0.0122 | 0.5915±0.0233 | 0.9748±0.0039 | 0.8146±0.0123 |
| 5   | 313.4±1.5166 | 332    | 0.9440±0.0046 | 0.8193±0.0146 | 0.6564±0.0292 | 0.9823±0.0037 | 0.8510±0.0127 |
| 6   | 274.0±1.0000 | 291    | 0.9416±0.0034 | 0.8087±0.0163 | 0.6353±0.0335 | 0.9821±0.0021 | 0.8423±0.0119 |
| 7   | 234.2±1.0954 | 250    | 0.9368±0.0044 | 0.7905±0.0189 | 0.6000±0.0393 | 0.9810±0.0038 | 0.8261±0.0144 |
| 8   | 190.4±1.3416 | 201    | 0.9473±0.0067 | 0.8440±0.0286 | 0.7083±0.0589 | 0.9797±0.0051 | 0.8659±0.0202 |
| 9   | 148.8±0.4472 | 159    | 0.9358±0.0028 | 0.8137±0.0121 | 0.6476±0.0261 | 0.9797±0.0032 | 0.8454±0.0082 |
| 10  | 124.8±0.4472 | 133    | 0.9383±0.0034 | 0.8247±0.0117 | 0.6750±0.0280 | 0.9744±0.0060 | 0.8450±0.0066 |
| 11  | 109.0±1.2247 | 117    | 0.9316±0.0105 | 0.8129±0.0184 | 0.6533±0.0298 | 0.9725±0.0082 | 0.8359±0.0230 |
| 12  | 91.0±0.7071  | 99     | 0.9192±0.0071 | 0.7968±0.0180 | 0.6308±0.0344 | 0.9628±0.0052 | 0.8130±0.0166 |
| 13  | 82.2±0.8367  | 91     | 0.9033±0.0092 | 0.7769±0.0189 | 0.6000±0.0344 | 0.9538±0.0070 | 0.7917±0.0196 |
| 14  | 71.2±0.8367  | 75     | 0.9493±0.0112 | 0.9024±0.0297 | 0.8333±0.0589 | 0.9714±0.0071 | 0.9048±0.0224 |
| 15  | 64.0±0.0000  | 67     | 0.9552±0.0000 | 0.9367±0.0000 | 0.9091±0.0000 | 0.9643±0.0000 | 0.9213±0.0000 |
| 16  | 57.4±0.8944  | 59     | 0.9729±0.0152 | 0.9598±0.0447 | 0.9400±0.0894 | 0.9796±0.0000 | 0.9518±0.0290 |
| 17  | 53.6±0.8944  | 54     | 0.9926±0.0166 | 0.9778±0.0497 | 0.9556±0.0994 | 1.0000±0.0000 | 0.9853±0.0328 |
| 18  | 44.6±0.5477  | 45     | 0.9911±0.0122 | 0.9750±0.0342 | 0.9500±0.0685 | 1.0000±0.0000 | 0.9840±0.0219 |
| 19  | 38.0±0.0000  | 38     | 1.0000±0.0000 | 1.0000±0.0000 | 1.0000±0.0000 | 1.0000±0.0000 | 1.0000±0.0000 |
| 20  | 35.0±0.0000  | 35     | 1.0000±0.0000 | 1.0000±0.0000 | 1.0000±0.0000 | 1.0000±0.0000 | 1.0000±0.0000 |

Table 65: H12O Random Forest with imputation, results of CV, taking best model of grid using accuracy. Predictions from admission.

| Day | Corrects     | Totals | Accuracy      | AUC           | Sensitivity   | Specificity   | F1            |
|-----|--------------|--------|---------------|---------------|---------------|---------------|---------------|
| 1   | 368.2±0.8367 | 374    | 0.9845±0.0022 | 0.9488±0.0071 | 0.9000±0.0141 | 0.9975±0.0014 | 0.9653±0.0051 |
| 2   | 367.8±1.3038 | 374    | 0.9834±0.0035 | 0.9481±0.0077 | 0.9000±0.0141 | 0.9963±0.0026 | 0.9630±0.0077 |
| 3   | 363.2±1.3038 | 374    | 0.9711±0.0035 | 0.9089±0.0130 | 0.8240±0.0261 | 0.9938±0.0000 | 0.9337±0.0089 |
| 4   | 350.6±1.1402 | 364    | 0.9632±0.0031 | 0.8756±0.0121 | 0.7574±0.0243 | 0.9937±0.0000 | 0.9103±0.0087 |
| 5   | 315.0±1.5811 | 332    | 0.9488±0.0048 | 0.7998±0.0226 | 0.6051±0.0466 | 0.9945±0.0031 | 0.8530±0.0170 |
| 6   | 273.6±0.5477 | 291    | 0.9402±0.0019 | 0.7722±0.0064 | 0.5529±0.0132 | 0.9914±0.0017 | 0.8253±0.0059 |
| 7   | 235.4±0.8944 | 250    | 0.9416±0.0036 | 0.7932±0.0154 | 0.6000±0.0308 | 0.9864±0.0000 | 0.8359±0.0129 |
| 8   | 182.6±1.6733 | 201    | 0.9085±0.0083 | 0.6923±0.0124 | 0.4083±0.0186 | 0.9763±0.0074 | 0.7329±0.0187 |
| 9   | 138.6±0.5477 | 159    | 0.8717±0.0034 | 0.6193±0.0104 | 0.2762±0.0213 | 0.9623±0.0032 | 0.6455±0.0121 |
| 10  | 118.6±1.1402 | 133    | 0.8917±0.0086 | 0.6525±0.0152 | 0.3375±0.0342 | 0.9675±0.0111 | 0.6843±0.0162 |
| 11  | 102.8±1.3038 | 117    | 0.8786±0.0111 | 0.6518±0.0169 | 0.3467±0.0298 | 0.9569±0.0112 | 0.6777±0.0213 |
| 12  | 85.4±0.5477  | 99     | 0.8626±0.0055 | 0.6597±0.0032 | 0.3846±0.0000 | 0.9349±0.0064 | 0.6730±0.0067 |
| 13  | 80.8±0.8367  | 91     | 0.8879±0.0092 | 0.7103±0.0054 | 0.4615±0.0000 | 0.9590±0.0107 | 0.7387±0.0131 |
| 14  | 64.2±1.0954  | 75     | 0.8560±0.0146 | 0.6377±0.0361 | 0.3167±0.0697 | 0.9587±0.0087 | 0.6644±0.0415 |
| 15  | 57.4±0.5477  | 67     | 0.8567±0.0082 | 0.7170±0.0372 | 0.5091±0.0813 | 0.9250±0.0080 | 0.7256±0.0274 |
| 16  | 50.2±2.3875  | 59     | 0.8508±0.0405 | 0.7192±0.0537 | 0.5200±0.0837 | 0.9184±0.0382 | 0.7280±0.0624 |
| 17  | 43.4±0.5477  | 54     | 0.8037±0.0101 | 0.5800±0.0396 | 0.2444±0.0930 | 0.9156±0.0186 | 0.5864±0.0441 |
| 18  | 34.6±0.5477  | 45     | 0.7689±0.0122 | 0.5851±0.0322 | 0.3000±0.0685 | 0.8703±0.0121 | 0.5874±0.0305 |
| 19  | 29.6±0.8944  | 38     | 0.7789±0.0235 | 0.5979±0.0140 | 0.3333±0.0000 | 0.8625±0.0280 | 0.5958±0.0188 |
| 20  | 26.4±0.5477  | 35     | 0.7543±0.0156 | 0.5213±0.0094 | 0.1667±0.0000 | 0.8759±0.0189 | 0.5221±0.0102 |

Table 66: H12O Random Forest with imputation, results of CV, taking best model of grid using accuracy. Predictions from outcome.

| Day | Corrects     | Totals | Accuracy      | AUC           | Sensitivity   | Specificity   | F1            |
|-----|--------------|--------|---------------|---------------|---------------|---------------|---------------|
| 1   | 334.6±2.0736 | 374    | 0.8947±0.0055 | 0.6753±0.0157 | 0.3760±0.0329 | 0.9747±0.0059 | 0.7146±0.0163 |
| 2   | 339.8±0.8367 | 374    | 0.9086±0.0022 | 0.7070±0.0037 | 0.4320±0.0110 | 0.9821±0.0040 | 0.7536±0.0024 |
| 3   | 343.6±1.8166 | 374    | 0.9187±0.0049 | 0.7653±0.0134 | 0.5560±0.0261 | 0.9747±0.0034 | 0.8002±0.0129 |
| 4   | 336.8±2.1679 | 364    | 0.9253±0.0060 | 0.7831±0.0105 | 0.5915±0.0178 | 0.9748±0.0050 | 0.8147±0.0133 |
| 5   | 314.4±2.0736 | 332    | 0.9470±0.0062 | 0.8322±0.0197 | 0.6821±0.0389 | 0.9823±0.0044 | 0.8607±0.0172 |
| 6   | 274.6±0.5477 | 291    | 0.9436±0.0019 | 0.8124±0.0064 | 0.6412±0.0132 | 0.9837±0.0017 | 0.8476±0.0054 |
| 7   | 234.4±1.6733 | 250    | 0.9376±0.0067 | 0.7910±0.0307 | 0.6000±0.0626 | 0.9819±0.0032 | 0.8272±0.0238 |
| 8   | 190.0±1.2247 | 201    | 0.9453±0.0061 | 0.8393±0.0268 | 0.7000±0.0543 | 0.9785±0.0025 | 0.8609±0.0191 |
| 9   | 149.2±0.8367 | 159    | 0.9384±0.0053 | 0.8272±0.0199 | 0.6762±0.0398 | 0.9783±0.0000 | 0.8540±0.0153 |
| 10  | 124.8±0.4472 | 133    | 0.9383±0.0034 | 0.8301±0.0192 | 0.6875±0.0442 | 0.9726±0.0072 | 0.8467±0.0087 |
| 11  | 108.8±1.3038 | 117    | 0.9299±0.0111 | 0.8006±0.0304 | 0.6267±0.0596 | 0.9745±0.0088 | 0.8281±0.0283 |
| 12  | 91.2±0.8367  | 99     | 0.9212±0.0085 | 0.7979±0.0177 | 0.6308±0.0344 | 0.9651±0.0082 | 0.8165±0.0177 |
| 13  | 82.4±0.5477  | 91     | 0.9055±0.0060 | 0.7846±0.0035 | 0.6154±0.0000 | 0.9538±0.0070 | 0.7980±0.0091 |
| 14  | 71.6±1.5166  | 75     | 0.9547±0.0202 | 0.9123±0.0391 | 0.8500±0.0697 | 0.9746±0.0142 | 0.9151±0.0386 |
| 15  | 64.0±0.7071  | 67     | 0.9552±0.0106 | 0.9294±0.0217 | 0.8909±0.0407 | 0.9679±0.0080 | 0.9201±0.0193 |
| 16  | 57.4±0.5477  | 59     | 0.9729±0.0093 | 0.9598±0.0274 | 0.9400±0.0548 | 0.9796±0.0000 | 0.9523±0.0171 |
| 17  | 53.6±0.8944  | 54     | 0.9926±0.0166 | 0.9778±0.0497 | 0.9556±0.0994 | 1.0000±0.0000 | 0.9853±0.0328 |
| 18  | 44.8±0.4472  | 45     | 0.9956±0.0099 | 0.9875±0.0280 | 0.9750±0.0559 | 1.0000±0.0000 | 0.9920±0.0179 |
| 19  | 38.0±0.0000  | 38     | 1.0000±0.0000 | 1.0000±0.0000 | 1.0000±0.0000 | 1.0000±0.0000 | 1.0000±0.0000 |
| 20  | 35.0±0.0000  | 35     | 1.0000±0.0000 | 1.0000±0.0000 | 1.0000±0.0000 | 1.0000±0.0000 | 1.0000±0.0000 |

Table 67: H12O Random Forest with imputation, results of CV, taking best model of grid using F1. Predictions from admission.

| Day | Corrects     | Totals | Accuracy      | AUC           | Sensitivity   | Specificity   | F1            |
|-----|--------------|--------|---------------|---------------|---------------|---------------|---------------|
| 1   | 368.8±0.8367 | 374    | 0.9861±0.0022 | 0.9548±0.0058 | 0.9120±0.0110 | 0.9975±0.0014 | 0.9690±0.0050 |
| 2   | 367.8±1.3038 | 374    | 0.9834±0.0035 | 0.9481±0.0077 | 0.9000±0.0141 | 0.9963±0.0026 | 0.9630±0.0077 |
| 3   | 363.4±0.8944 | 374    | 0.9717±0.0024 | 0.9109±0.0089 | 0.8280±0.0179 | 0.9938±0.0000 | 0.9351±0.0060 |
| 4   | 350.4±0.5477 | 364    | 0.9626±0.0015 | 0.8734±0.0058 | 0.7532±0.0117 | 0.9937±0.0000 | 0.9088±0.0042 |
| 5   | 314.4±2.3022 | 332    | 0.9470±0.0069 | 0.7921±0.0297 | 0.5897±0.0601 | 0.9945±0.0031 | 0.8463±0.0244 |
| 6   | 274.4±1.3416 | 291    | 0.9430±0.0046 | 0.7789±0.0235 | 0.5647±0.0483 | 0.9930±0.0017 | 0.8328±0.0188 |
| 7   | 235.4±0.8944 | 250    | 0.9416±0.0036 | 0.7932±0.0154 | 0.6000±0.0308 | 0.9864±0.0000 | 0.8359±0.0129 |
| 8   | 182.6±1.3416 | 201    | 0.9085±0.0067 | 0.6959±0.0038 | 0.4167±0.0000 | 0.9751±0.0076 | 0.7354±0.0111 |
| 9   | 139.2±0.8367 | 159    | 0.8755±0.0053 | 0.6335±0.0124 | 0.3048±0.0261 | 0.9623±0.0061 | 0.6615±0.0136 |
| 10  | 119.8±1.3038 | 133    | 0.9008±0.0098 | 0.6792±0.0269 | 0.3875±0.0523 | 0.9709±0.0076 | 0.7144±0.0298 |
| 11  | 103.0±0.7071 | 117    | 0.8803±0.0060 | 0.6584±0.0180 | 0.3600±0.0365 | 0.9569±0.0054 | 0.6840±0.0184 |
| 12  | 85.2±0.4472  | 99     | 0.8606±0.0045 | 0.6586±0.0026 | 0.3846±0.0000 | 0.9326±0.0052 | 0.6705±0.0054 |
| 13  | 80.4±0.5477  | 91     | 0.8835±0.0060 | 0.7077±0.0035 | 0.4615±0.0000 | 0.9538±0.0070 | 0.7324±0.0083 |
| 14  | 64.2±1.0954  | 75     | 0.8560±0.0146 | 0.6377±0.0361 | 0.3167±0.0697 | 0.9587±0.0087 | 0.6644±0.0415 |
| 15  | 57.2±0.4472  | 67     | 0.8537±0.0067 | 0.7080±0.0227 | 0.4909±0.0498 | 0.9250±0.0080 | 0.7185±0.0180 |
| 16  | 50.0±2.4495  | 59     | 0.8475±0.0415 | 0.7171±0.0524 | 0.5200±0.0837 | 0.9143±0.0418 | 0.7242±0.0622 |
| 17  | 42.6±0.8944  | 54     | 0.7889±0.0166 | 0.5356±0.0298 | 0.1556±0.0609 | 0.9156±0.0186 | 0.5367±0.0366 |
| 18  | 34.4±1.1402  | 45     | 0.7644±0.0253 | 0.5824±0.0411 | 0.3000±0.0685 | 0.8649±0.0191 | 0.5848±0.0424 |
| 19  | 29.4±1.3416  | 38     | 0.7737±0.0353 | 0.5948±0.0210 | 0.3333±0.0000 | 0.8562±0.0419 | 0.5921±0.0290 |
| 20  | 26.4±0.5477  | 35     | 0.7543±0.0156 | 0.5213±0.0094 | 0.1667±0.0000 | 0.8759±0.0189 | 0.5221±0.0102 |

Table 68: H12O Random Forest with imputation, results of CV, taking best model of grid using F1. Predictions from outcome.

| Day | Corrects     | Totals | Accuracy      | AUC           | Sensitivity   | Specificity   | F1            |
|-----|--------------|--------|---------------|---------------|---------------|---------------|---------------|
| 1   | 334.2±0.8367 | 374    | 0.8936±0.0022 | 0.6663±0.0123 | 0.3560±0.0261 | 0.9765±0.0017 | 0.7063±0.0123 |
| 2   | 339.0±2.2361 | 374    | 0.9064±0.0060 | 0.7041±0.0130 | 0.4280±0.0228 | 0.9802±0.0035 | 0.7489±0.0161 |
| 3   | 344.4±2.3022 | 374    | 0.9209±0.0062 | 0.7649±0.0154 | 0.5520±0.0335 | 0.9778±0.0077 | 0.8031±0.0142 |
| 4   | 339.4±1.5166 | 364    | 0.9324±0.0042 | 0.7963±0.0097 | 0.6128±0.0178 | 0.9798±0.0028 | 0.8313±0.0103 |
| 5   | 314.8±0.8367 | 332    | 0.9482±0.0025 | 0.8262±0.0091 | 0.6667±0.0181 | 0.9857±0.0015 | 0.8612±0.0075 |
| 6   | 276.2±1.3038 | 291    | 0.9491±0.0045 | 0.8283±0.0190 | 0.6706±0.0383 | 0.9860±0.0021 | 0.8631±0.0145 |
| 7   | 237.2±1.4832 | 250    | 0.9488±0.0059 | 0.8332±0.0227 | 0.6828±0.0450 | 0.9837±0.0025 | 0.8633±0.0183 |
| 8   | 190.6±0.5477 | 201    | 0.9483±0.0027 | 0.8410±0.0164 | 0.7000±0.0349 | 0.9819±0.0025 | 0.8671±0.0097 |
| 9   | 148.8±1.0954 | 159    | 0.9358±0.0069 | 0.8177±0.0261 | 0.6571±0.0522 | 0.9783±0.0000 | 0.8464±0.0207 |
| 10  | 125.6±0.8944 | 133    | 0.9444±0.0067 | 0.8227±0.0174 | 0.6625±0.0342 | 0.9829±0.0060 | 0.8550±0.0172 |
| 11  | 109.6±0.8944 | 117    | 0.9368±0.0076 | 0.8102±0.0186 | 0.6400±0.0365 | 0.9804±0.0069 | 0.8430±0.0187 |
| 12  | 90.8±0.4472  | 99     | 0.9172±0.0045 | 0.7760±0.0196 | 0.5846±0.0421 | 0.9674±0.0052 | 0.8010±0.0141 |
| 13  | 83.6±1.1402  | 91     | 0.9187±0.0125 | 0.8179±0.0206 | 0.6769±0.0344 | 0.9590±0.0107 | 0.8287±0.0243 |
| 14  | 71.8±0.8367  | 75     | 0.9573±0.0112 | 0.9071±0.0273 | 0.8333±0.0589 | 0.9810±0.0133 | 0.9184±0.0204 |
| 15  | 64.0±0.7071  | 67     | 0.9552±0.0106 | 0.9367±0.0321 | 0.9091±0.0643 | 0.9643±0.0000 | 0.9209±0.0205 |
| 16  | 57.8±0.4472  | 59     | 0.9797±0.0076 | 0.9798±0.0224 | 0.9800±0.0447 | 0.9796±0.0000 | 0.9648±0.0140 |
| 17  | 53.8±0.4472  | 54     | 0.9963±0.0083 | 0.9889±0.0248 | 0.9778±0.0497 | 1.0000±0.0000 | 0.9930±0.0156 |
| 18  | 44.6±0.5477  | 45     | 0.9911±0.0122 | 0.9750±0.0342 | 0.9500±0.0685 | 1.0000±0.0000 | 0.9840±0.0219 |
| 19  | 38.0±0.0000  | 38     | 1.0000±0.0000 | 1.0000±0.0000 | 1.0000±0.0000 | 1.0000±0.0000 | 1.0000±0.0000 |
| 20  | 35.0±0.0000  | 35     | 1.0000±0.0000 | 1.0000±0.0000 | 1.0000±0.0000 | 1.0000±0.0000 | 1.0000±0.0000 |

Table 69: H12O Random Forest with imputation, with missing flags, results of CV, taking best model of grid using accuracy. Predictions from admission.

| Day | Corrects     | Totals | Accuracy      | AUC           | Sensitivity   | Specificity   | F1            |
|-----|--------------|--------|---------------|---------------|---------------|---------------|---------------|
| 1   | 369.8±0.4472 | 374    | 0.9888±0.0012 | 0.9665±0.0045 | 0.9360±0.0089 | 0.9969±0.0000 | 0.9753±0.0027 |
| 2   | 368.2±0.8367 | 374    | 0.9845±0.0022 | 0.9538±0.0082 | 0.9120±0.0179 | 0.9957±0.0028 | 0.9656±0.0050 |
| 3   | 364.2±1.3038 | 374    | 0.9738±0.0035 | 0.9172±0.0153 | 0.8400±0.0316 | 0.9944±0.0014 | 0.9402±0.0089 |
| 4   | 351.4±0.8944 | 364    | 0.9654±0.0025 | 0.8823±0.0088 | 0.7702±0.0178 | 0.9943±0.0014 | 0.9160±0.0065 |
| 5   | 314.4±1.9494 | 332    | 0.9470±0.0059 | 0.7899±0.0215 | 0.5846±0.0421 | 0.9952±0.0019 | 0.8458±0.0202 |
| 6   | 274.6±0.8944 | 291    | 0.9436±0.0031 | 0.7818±0.0130 | 0.5706±0.0263 | 0.9930±0.0017 | 0.8358±0.0108 |
| 7   | 235.2±0.4472 | 250    | 0.9408±0.0018 | 0.7868±0.0114 | 0.5862±0.0244 | 0.9873±0.0020 | 0.8318±0.0076 |
| 8   | 182.8±1.6432 | 201    | 0.9095±0.0082 | 0.6929±0.0273 | 0.4083±0.0543 | 0.9774±0.0056 | 0.7337±0.0289 |
| 9   | 139.8±0.8367 | 159    | 0.8792±0.0053 | 0.6236±0.0199 | 0.2762±0.0398 | 0.9710±0.0000 | 0.6544±0.0233 |
| 10  | 120.2±0.8367 | 133    | 0.9038±0.0063 | 0.6701±0.0130 | 0.3625±0.0280 | 0.9778±0.0076 | 0.7111±0.0151 |
| 11  | 104.6±1.1402 | 117    | 0.8940±0.0097 | 0.6663±0.0200 | 0.3600±0.0365 | 0.9725±0.0082 | 0.7034±0.0246 |
| 12  | 86.6±0.5477  | 99     | 0.8747±0.0055 | 0.6667±0.0032 | 0.3846±0.0000 | 0.9488±0.0064 | 0.6880±0.0071 |
| 13  | 81.2±0.8367  | 91     | 0.8923±0.0092 | 0.7128±0.0054 | 0.4615±0.0000 | 0.9641±0.0107 | 0.7450±0.0132 |
| 14  | 65.0±0.7071  | 75     | 0.8667±0.0094 | 0.6373±0.0348 | 0.3000±0.0745 | 0.9746±0.0087 | 0.6697±0.0376 |
| 15  | 58.4±0.8944  | 67     | 0.8716±0.0133 | 0.7187±0.0257 | 0.4909±0.0498 | 0.9464±0.0126 | 0.7407±0.0267 |
| 16  | 50.8±0.8367  | 59     | 0.8610±0.0142 | 0.7412±0.0259 | 0.5600±0.0548 | 0.9224±0.0171 | 0.7469±0.0238 |
| 17  | 42.6±0.5477  | 54     | 0.7889±0.0101 | 0.5622±0.0357 | 0.2222±0.0786 | 0.9022±0.0122 | 0.5664±0.0390 |
| 18  | 34.8±0.8367  | 45     | 0.7733±0.0186 | 0.5878±0.0313 | 0.3000±0.0685 | 0.8757±0.0242 | 0.5911±0.0310 |
| 19  | 28.4±0.5477  | 38     | 0.7474±0.0144 | 0.5792±0.0086 | 0.3333±0.0000 | 0.8250±0.0171 | 0.5703±0.0111 |
| 20  | 26.2±0.4472  | 35     | 0.7486±0.0128 | 0.5178±0.0077 | 0.1667±0.0000 | 0.8690±0.0154 | 0.5184±0.0084 |

Table 70: H12O Random Forest with imputation, with missing flags, results of CV, taking best model of grid using accuracy. Predictions from outcome.

| Day | Corrects     | Totals | Accuracy      | AUC           | Sensitivity   | Specificity   | F1            |
|-----|--------------|--------|---------------|---------------|---------------|---------------|---------------|
| 1   | 332.2±2.1679 | 374    | 0.8882±0.0058 | 0.6987±0.0089 | 0.4400±0.0141 | 0.9574±0.0051 | 0.7249±0.0118 |
| 2   | 337.2±1.6432 | 374    | 0.9016±0.0044 | 0.7166±0.0090 | 0.4640±0.0167 | 0.9691±0.0038 | 0.7512±0.0103 |
| 3   | 342.0±0.7071 | 374    | 0.9144±0.0019 | 0.7730±0.0061 | 0.5800±0.0141 | 0.9660±0.0031 | 0.7979±0.0041 |
| 4   | 338.8±1.9235 | 364    | 0.9308±0.0053 | 0.8135±0.0145 | 0.6553±0.0277 | 0.9716±0.0032 | 0.8351±0.0134 |
| 5   | 311.6±3.2863 | 332    | 0.9386±0.0099 | 0.8163±0.0353 | 0.6564±0.0693 | 0.9761±0.0042 | 0.8397±0.0304 |
| 6   | 274.2±2.5884 | 291    | 0.9423±0.0089 | 0.8244±0.0271 | 0.6706±0.0526 | 0.9782±0.0059 | 0.8490±0.0247 |
| 7   | 237.2±1.3038 | 250    | 0.9488±0.0052 | 0.8422±0.0163 | 0.7034±0.0308 | 0.9810±0.0020 | 0.8662±0.0147 |
| 8   | 190.4±0.5477 | 201    | 0.9473±0.0027 | 0.8476±0.0091 | 0.7167±0.0186 | 0.9785±0.0025 | 0.8674±0.0070 |
| 9   | 147.6±1.1402 | 159    | 0.9283±0.0072 | 0.8093±0.0148 | 0.6476±0.0261 | 0.9710±0.0051 | 0.8320±0.0163 |
| 10  | 124.2±0.8367 | 133    | 0.9338±0.0063 | 0.8005±0.0208 | 0.6250±0.0442 | 0.9761±0.0072 | 0.8285±0.0168 |
| 11  | 109.2±0.8367 | 117    | 0.9333±0.0072 | 0.8082±0.0189 | 0.6400±0.0365 | 0.9765±0.0054 | 0.8366±0.0180 |
| 12  | 91.0±1.2247  | 99     | 0.9192±0.0124 | 0.7772±0.0345 | 0.5846±0.0688 | 0.9698±0.0104 | 0.8043±0.0303 |
| 13  | 84.4±0.8944  | 91     | 0.9275±0.0098 | 0.8359±0.0303 | 0.7077±0.0644 | 0.9641±0.0107 | 0.8466±0.0223 |
| 14  | 72.0±0.7071  | 75     | 0.9600±0.0094 | 0.9290±0.0225 | 0.8833±0.0456 | 0.9746±0.0087 | 0.9260±0.0177 |
| 15  | 64.2±0.4472  | 67     | 0.9582±0.0067 | 0.9458±0.0203 | 0.9273±0.0407 | 0.9643±0.0000 | 0.9269±0.0125 |
| 16  | 57.4±0.5477  | 59     | 0.9729±0.0093 | 0.9598±0.0274 | 0.9400±0.0548 | 0.9796±0.0000 | 0.9523±0.0171 |
| 17  | 53.0±0.7071  | 54     | 0.9815±0.0131 | 0.9444±0.0393 | 0.8889±0.0786 | 1.0000±0.0000 | 0.9644±0.0260 |
| 18  | 44.0±0.0000  | 45     | 0.9778±0.0000 | 0.9375±0.0000 | 0.8750±0.0000 | 1.0000±0.0000 | 0.9600±0.0000 |
| 19  | 37.4±0.5477  | 38     | 0.9842±0.0144 | 0.9500±0.0456 | 0.9000±0.0913 | 1.0000±0.0000 | 0.9681±0.0291 |
| 20  | 34.4±0.5477  | 35     | 0.9829±0.0156 | 0.9500±0.0456 | 0.9000±0.0913 | 1.0000±0.0000 | 0.9676±0.0295 |

Table 71: H12O Random Forest with imputation, with missing flags, results of CV, taking best model of grid using F1. Predictions from admission.

| Day | Corrects     | Totals | Accuracy      | AUC           | Sensitivity   | Specificity   | F1            |
|-----|--------------|--------|---------------|---------------|---------------|---------------|---------------|
| 1   | 369.0±0.7071 | 374    | 0.9866±0.0019 | 0.9601±0.0047 | 0.9240±0.0089 | 0.9963±0.0014 | 0.9705±0.0042 |
| 2   | 367.8±0.4472 | 374    | 0.9834±0.0012 | 0.9431±0.0050 | 0.8880±0.0110 | 0.9981±0.0017 | 0.9626±0.0027 |
| 3   | 364.0±1.2247 | 374    | 0.9733±0.0033 | 0.9118±0.0146 | 0.8280±0.0303 | 0.9957±0.0017 | 0.9384±0.0086 |
| 4   | 351.0±1.5811 | 364    | 0.9643±0.0043 | 0.8744±0.0128 | 0.7532±0.0243 | 0.9956±0.0017 | 0.9123±0.0112 |
| 5   | 315.2±1.9235 | 332    | 0.9494±0.0058 | 0.8046±0.0223 | 0.6154±0.0444 | 0.9939±0.0029 | 0.8561±0.0186 |
| 6   | 275.6±1.5166 | 291    | 0.9471±0.0052 | 0.8195±0.0178 | 0.6529±0.0383 | 0.9860±0.0065 | 0.8564±0.0135 |
| 7   | 235.4±1.5166 | 250    | 0.9416±0.0061 | 0.8022±0.0216 | 0.6207±0.0422 | 0.9837±0.0025 | 0.8392±0.0188 |
| 8   | 183.6±2.0736 | 201    | 0.9134±0.0103 | 0.7167±0.0173 | 0.4583±0.0295 | 0.9751±0.0095 | 0.7555±0.0231 |
| 9   | 139.0±2.5495 | 159    | 0.8742±0.0160 | 0.6449±0.0376 | 0.3333±0.0673 | 0.9565±0.0089 | 0.6704±0.0436 |
| 10  | 119.4±0.5477 | 133    | 0.8977±0.0041 | 0.6883±0.0146 | 0.4125±0.0342 | 0.9641±0.0072 | 0.7176±0.0112 |
| 11  | 102.0±0.7071 | 117    | 0.8718±0.0060 | 0.6478±0.0102 | 0.3467±0.0298 | 0.9490±0.0107 | 0.6686±0.0061 |
| 12  | 83.2±0.8367  | 99     | 0.8404±0.0085 | 0.6470±0.0049 | 0.3846±0.0000 | 0.9093±0.0097 | 0.6481±0.0089 |
| 13  | 79.8±0.4472  | 91     | 0.8769±0.0049 | 0.7038±0.0029 | 0.4615±0.0000 | 0.9462±0.0057 | 0.7234±0.0064 |
| 14  | 64.8±1.3038  | 75     | 0.8640±0.0174 | 0.6694±0.0483 | 0.3833±0.0950 | 0.9556±0.0071 | 0.6962±0.0517 |
| 15  | 56.0±1.4142  | 67     | 0.8358±0.0211 | 0.6972±0.0350 | 0.4909±0.0813 | 0.9036±0.0299 | 0.6979±0.0320 |
| 16  | 48.4±1.6733  | 59     | 0.8203±0.0284 | 0.6929±0.0435 | 0.5000±0.0707 | 0.8857±0.0233 | 0.6886±0.0453 |
| 17  | 41.4±2.0736  | 54     | 0.7667±0.0384 | 0.6200±0.0616 | 0.4000±0.0994 | 0.8400±0.0290 | 0.6108±0.0580 |
| 18  | 33.0±0.7071  | 45     | 0.7333±0.0157 | 0.5831±0.0458 | 0.3500±0.1046 | 0.8162±0.0226 | 0.5743±0.0368 |
| 19  | 27.8±0.4472  | 38     | 0.7316±0.0118 | 0.5833±0.0327 | 0.3667±0.0745 | 0.8000±0.0171 | 0.5668±0.0225 |
| 20  | 26.0±0.0000  | 35     | 0.7429±0.0000 | 0.5144±0.0000 | 0.1667±0.0000 | 0.8621±0.0000 | 0.5146±0.0000 |

Table 72: H12O Random Forest with imputation, with missing flags, results of CV, taking best model of grid using F1. Predictions from outcome.

| Day | Corrects     | Totals | Accuracy      | AUC           | Sensitivity   | Specificity   | F1            |
|-----|--------------|--------|---------------|---------------|---------------|---------------|---------------|
| 1   | 326.2±1.4832 | 374    | 0.8722±0.0040 | 0.6472±0.0106 | 0.3400±0.0245 | 0.9543±0.0059 | 0.6718±0.0097 |
| 2   | 333.6±2.3022 | 374    | 0.8920±0.0062 | 0.6823±0.0127 | 0.3960±0.0219 | 0.9685±0.0040 | 0.7173±0.0156 |
| 3   | 339.4±0.8944 | 374    | 0.9075±0.0024 | 0.7504±0.0098 | 0.5360±0.0219 | 0.9648±0.0035 | 0.7776±0.0072 |
| 4   | 337.2±0.8367 | 364    | 0.9264±0.0023 | 0.7946±0.0065 | 0.6170±0.0150 | 0.9722±0.0035 | 0.8211±0.0048 |
| 5   | 310.8±1.3038 | 332    | 0.9361±0.0039 | 0.8082±0.0254 | 0.6410±0.0544 | 0.9754±0.0044 | 0.8328±0.0157 |
| 6   | 275.0±2.1213 | 291    | 0.9450±0.0073 | 0.8540±0.0167 | 0.7353±0.0294 | 0.9728±0.0048 | 0.8633±0.0177 |
| 7   | 234.6±0.8944 | 250    | 0.9384±0.0036 | 0.8244±0.0086 | 0.6759±0.0189 | 0.9729±0.0045 | 0.8417±0.0078 |
| 8   | 190.2±0.4472 | 201    | 0.9463±0.0022 | 0.8470±0.0203 | 0.7167±0.0456 | 0.9774±0.0056 | 0.8652±0.0086 |
| 9   | 149.4±0.8944 | 159    | 0.9396±0.0056 | 0.8401±0.0250 | 0.7048±0.0522 | 0.9754±0.0040 | 0.8600±0.0169 |
| 10  | 122.8±0.4472 | 133    | 0.9233±0.0034 | 0.8161±0.0117 | 0.6750±0.0280 | 0.9573±0.0060 | 0.8178±0.0063 |
| 11  | 108.0±0.7071 | 117    | 0.9231±0.0060 | 0.8251±0.0180 | 0.6933±0.0365 | 0.9569±0.0054 | 0.8269±0.0141 |
| 12  | 92.6±0.5477  | 99     | 0.9354±0.0055 | 0.8322±0.0032 | 0.6923±0.0000 | 0.9721±0.0064 | 0.8506±0.0099 |
| 13  | 84.6±1.1402  | 91     | 0.9297±0.0125 | 0.8308±0.0386 | 0.6923±0.0769 | 0.9692±0.0070 | 0.8479±0.0307 |
| 14  | 71.8±0.4472  | 75     | 0.9573±0.0060 | 0.9139±0.0163 | 0.8500±0.0373 | 0.9778±0.0087 | 0.9195±0.0107 |
| 15  | 64.0±0.0000  | 67     | 0.9552±0.0000 | 0.9367±0.0000 | 0.9091±0.0000 | 0.9643±0.0000 | 0.9213±0.0000 |
| 16  | 57.0±0.0000  | 59     | 0.9661±0.0000 | 0.9398±0.0000 | 0.9000±0.0000 | 0.9796±0.0000 | 0.9398±0.0000 |
| 17  | 53.0±0.0000  | 54     | 0.9815±0.0000 | 0.9444±0.0000 | 0.8889±0.0000 | 1.0000±0.0000 | 0.9651±0.0000 |
| 18  | 43.4±0.8944  | 45     | 0.9644±0.0199 | 0.9294±0.0121 | 0.8750±0.0000 | 0.9838±0.0242 | 0.9390±0.0310 |
| 19  | 36.6±0.5477  | 38     | 0.9632±0.0144 | 0.9510±0.0456 | 0.9333±0.0913 | 0.9688±0.0000 | 0.9326±0.0288 |
| 20  | 33.8±0.4472  | 35     | 0.9657±0.0128 | 0.9661±0.0373 | 0.9667±0.0745 | 0.9655±0.0000 | 0.9421±0.0239 |

Table 73: H12O Random Forest with imputation, with missing flags, applying reference values, results of CV, taking best model of grid using accuracy. Predictions from admission.

| Day | Corrects     | Totals | Accuracy      | AUC           | Sensitivity   | Specificity   | F1            |
|-----|--------------|--------|---------------|---------------|---------------|---------------|---------------|
| 1   | 364.0±0.7071 | 374    | 0.9733±0.0019 | 0.9355±0.0072 | 0.8840±0.0167 | 0.9870±0.0034 | 0.9415±0.0038 |
| 2   | 363.8±0.8367 | 374    | 0.9727±0.0022 | 0.9200±0.0057 | 0.8480±0.0110 | 0.9920±0.0017 | 0.9385±0.0051 |
| 3   | 361.8±1.3038 | 374    | 0.9674±0.0035 | 0.8966±0.0101 | 0.8000±0.0200 | 0.9932±0.0026 | 0.9245±0.0083 |
| 4   | 347.6±1.5166 | 364    | 0.9549±0.0042 | 0.8545±0.0139 | 0.7191±0.0277 | 0.9899±0.0026 | 0.8896±0.0112 |
| 5   | 314.0±1.5811 | 332    | 0.9458±0.0048 | 0.7937±0.0146 | 0.5949±0.0281 | 0.9925±0.0029 | 0.8452±0.0143 |
| 6   | 273.2±1.3038 | 291    | 0.9388±0.0045 | 0.7714±0.0127 | 0.5529±0.0246 | 0.9899±0.0035 | 0.8224±0.0131 |
| 7   | 232.8±0.8367 | 250    | 0.9312±0.0033 | 0.7634±0.0179 | 0.5448±0.0378 | 0.9819±0.0032 | 0.8044±0.0137 |
| 8   | 185.0±1.4142 | 201    | 0.9204±0.0070 | 0.7279±0.0243 | 0.4750±0.0475 | 0.9808±0.0031 | 0.7714±0.0242 |
| 9   | 139.8±0.4472 | 159    | 0.8792±0.0028 | 0.6559±0.0195 | 0.3524±0.0426 | 0.9594±0.0040 | 0.6833±0.0186 |
| 10  | 118.8±0.4472 | 133    | 0.8932±0.0034 | 0.6965±0.0019 | 0.4375±0.0000 | 0.9556±0.0038 | 0.7184±0.0049 |
| 11  | 101.4±1.5166 | 117    | 0.8667±0.0130 | 0.6676±0.0074 | 0.4000±0.0000 | 0.9353±0.0149 | 0.6801±0.0155 |
| 12  | 86.6±1.1402  | 99     | 0.8747±0.0115 | 0.6928±0.0148 | 0.4462±0.0344 | 0.9395±0.0152 | 0.7061±0.0164 |
| 13  | 81.4±0.5477  | 91     | 0.8945±0.0060 | 0.7333±0.0201 | 0.5077±0.0421 | 0.9590±0.0057 | 0.7590±0.0173 |
| 14  | 62.0±1.4142  | 75     | 0.8267±0.0189 | 0.6540±0.0249 | 0.4000±0.0373 | 0.9079±0.0174 | 0.6618±0.0291 |
| 15  | 55.8±0.8367  | 67     | 0.8328±0.0125 | 0.7174±0.0075 | 0.5455±0.0000 | 0.8893±0.0149 | 0.7083±0.0136 |
| 16  | 47.2±1.0954  | 59     | 0.8000±0.0186 | 0.7045±0.0261 | 0.5600±0.0548 | 0.8490±0.0233 | 0.6813±0.0237 |
| 17  | 43.2±1.3038  | 54     | 0.8000±0.0241 | 0.6489±0.0714 | 0.4222±0.1449 | 0.8756±0.0122 | 0.6431±0.0626 |
| 18  | 33.2±1.3038  | 45     | 0.7378±0.0290 | 0.6152±0.0727 | 0.4250±0.1425 | 0.8054±0.0121 | 0.5980±0.0586 |
| 19  | 27.2±0.4472  | 38     | 0.7158±0.0118 | 0.5604±0.0070 | 0.3333±0.0000 | 0.7875±0.0140 | 0.5470±0.0085 |
| 20  | 25.2±0.4472  | 35     | 0.7200±0.0128 | 0.5006±0.0077 | 0.1667±0.0000 | 0.8345±0.0154 | 0.5006±0.0078 |

Table 74: H12O Random Forest with imputation, with missing flags, applying reference values, results of CV, taking best model of grid using accuracy. Predictions from outcome.

| Day | Corrects     | Totals | Accuracy      | AUC           | Sensitivity   | Specificity   | F1            |
|-----|--------------|--------|---------------|---------------|---------------|---------------|---------------|
| 1   | 327.0±0.7071 | 374    | 0.8743±0.0019 | 0.6670±0.0191 | 0.3840±0.0434 | 0.9500±0.0055 | 0.6888±0.0157 |
| 2   | 334.2±1.4832 | 374    | 0.8936±0.0040 | 0.6900±0.0131 | 0.4120±0.0303 | 0.9679±0.0064 | 0.7243±0.0108 |
| 3   | 339.4±1.1402 | 374    | 0.9075±0.0030 | 0.7504±0.0152 | 0.5360±0.0329 | 0.9648±0.0035 | 0.7774±0.0111 |
| 4   | 338.4±1.5166 | 364    | 0.9297±0.0042 | 0.7983±0.0157 | 0.6213±0.0316 | 0.9754±0.0014 | 0.8276±0.0127 |
| 5   | 310.6±2.0736 | 332    | 0.9355±0.0062 | 0.8190±0.0135 | 0.6667±0.0256 | 0.9713±0.0057 | 0.8362±0.0144 |
| 6   | 273.2±0.8367 | 291    | 0.9388±0.0029 | 0.8429±0.0113 | 0.7176±0.0263 | 0.9681±0.0051 | 0.8491±0.0060 |
| 7   | 234.6±1.6733 | 250    | 0.9384±0.0067 | 0.8274±0.0195 | 0.6828±0.0378 | 0.9719±0.0050 | 0.8426±0.0176 |
| 8   | 189.4±1.1402 | 201    | 0.9423±0.0057 | 0.8448±0.0151 | 0.7167±0.0349 | 0.9729±0.0084 | 0.8577±0.0115 |
| 9   | 150.8±0.4472 | 159    | 0.9484±0.0028 | 0.8653±0.0106 | 0.7524±0.0213 | 0.9783±0.0000 | 0.8822±0.0077 |
| 10  | 123.4±0.8944 | 133    | 0.9278±0.0067 | 0.8295±0.0140 | 0.7000±0.0280 | 0.9590±0.0072 | 0.8296±0.0136 |
| 11  | 108.6±1.1402 | 117    | 0.9282±0.0097 | 0.8280±0.0200 | 0.6933±0.0365 | 0.9627±0.0082 | 0.8357±0.0208 |
| 12  | 92.8±1.3038  | 99     | 0.9374±0.0132 | 0.8268±0.0210 | 0.6769±0.0344 | 0.9767±0.0116 | 0.8524±0.0281 |
| 13  | 84.8±1.0954  | 91     | 0.9319±0.0120 | 0.8385±0.0331 | 0.7077±0.0644 | 0.9692±0.0070 | 0.8539±0.0280 |
| 14  | 71.2±0.8367  | 75     | 0.9493±0.0112 | 0.8956±0.0337 | 0.8167±0.0697 | 0.9746±0.0087 | 0.9034±0.0229 |
| 15  | 64.0±0.0000  | 67     | 0.9552±0.0000 | 0.9367±0.0000 | 0.9091±0.0000 | 0.9643±0.0000 | 0.9213±0.0000 |
| 16  | 57.4±0.5477  | 59     | 0.9729±0.0093 | 0.9598±0.0274 | 0.9400±0.0548 | 0.9796±0.0000 | 0.9523±0.0171 |
| 17  | 53.0±0.0000  | 54     | 0.9815±0.0000 | 0.9444±0.0000 | 0.8889±0.0000 | 1.0000±0.0000 | 0.9651±0.0000 |
| 18  | 43.4±0.5477  | 45     | 0.9644±0.0122 | 0.9294±0.0074 | 0.8750±0.0000 | 0.9838±0.0148 | 0.9384±0.0197 |
| 19  | 36.4±0.5477  | 38     | 0.9579±0.0144 | 0.9344±0.0456 | 0.9000±0.0913 | 0.9688±0.0000 | 0.9221±0.0288 |
| 20  | 33.8±0.4472  | 35     | 0.9657±0.0128 | 0.9661±0.0373 | 0.9667±0.0745 | 0.9655±0.0000 | 0.9421±0.0239 |

Table 75: H12O Random Forest with imputation, with missing flags, applying reference values, results of CV, taking best model of grid using F1. Predictions from admission.



| Day | Corrects     | Totals | Accuracy      | AUC           | Sensitivity   | Specificity   | F1            |
|-----|--------------|--------|---------------|---------------|---------------|---------------|---------------|
| 1   | 365.2±0.8367 | 374    | 0.9765±0.0022 | 0.9424±0.0049 | 0.8960±0.0089 | 0.9889±0.0017 | 0.9485±0.0049 |
| 2   | 363.2±1.3038 | 374    | 0.9711±0.0035 | 0.9191±0.0116 | 0.8480±0.0228 | 0.9901±0.0014 | 0.9352±0.0083 |
| 3   | 362.6±1.8166 | 374    | 0.9695±0.0049 | 0.9029±0.0152 | 0.8120±0.0303 | 0.9938±0.0031 | 0.9297±0.0116 |
| 4   | 348.8±1.6432 | 364    | 0.9582±0.0045 | 0.8619±0.0176 | 0.7319±0.0356 | 0.9918±0.0017 | 0.8976±0.0126 |
| 5   | 315.6±1.8166 | 332    | 0.9506±0.0055 | 0.8231±0.0260 | 0.6564±0.0532 | 0.9898±0.0024 | 0.8645±0.0189 |
| 6   | 274.6±1.6733 | 291    | 0.9436±0.0058 | 0.7946±0.0175 | 0.6000±0.0335 | 0.9891±0.0033 | 0.8409±0.0172 |
| 7   | 233.8±0.8367 | 250    | 0.9352±0.0033 | 0.7836±0.0122 | 0.5862±0.0244 | 0.9810±0.0020 | 0.8206±0.0107 |
| 8   | 184.2±0.8367 | 201    | 0.9164±0.0042 | 0.7220±0.0216 | 0.4667±0.0456 | 0.9774±0.0040 | 0.7621±0.0177 |
| 9   | 140.0±1.5811 | 159    | 0.8805±0.0099 | 0.6526±0.0319 | 0.3429±0.0621 | 0.9623±0.0032 | 0.6814±0.0345 |
| 10  | 118.6±1.1402 | 133    | 0.8917±0.0086 | 0.6795±0.0287 | 0.4000±0.0559 | 0.9590±0.0038 | 0.7046±0.0297 |
| 11  | 102.0±1.2247 | 117    | 0.8718±0.0105 | 0.6763±0.0164 | 0.4133±0.0298 | 0.9392±0.0107 | 0.6901±0.0185 |
| 12  | 85.0±0.7071  | 99     | 0.8586±0.0071 | 0.6705±0.0325 | 0.4154±0.0688 | 0.9256±0.0064 | 0.6764±0.0255 |
| 13  | 80.4±0.8944  | 91     | 0.8835±0.0098 | 0.7205±0.0215 | 0.4923±0.0421 | 0.9487±0.0091 | 0.7400±0.0211 |
| 14  | 62.6±1.3416  | 75     | 0.8347±0.0179 | 0.6520±0.0219 | 0.3833±0.0456 | 0.9206±0.0224 | 0.6647±0.0244 |
| 15  | 54.0±1.2247  | 67     | 0.8060±0.0183 | 0.6867±0.0429 | 0.5091±0.0813 | 0.8643±0.0098 | 0.6716±0.0355 |
| 16  | 47.6±1.5166  | 59     | 0.8068±0.0257 | 0.7165±0.0297 | 0.5800±0.0447 | 0.8531±0.0266 | 0.6927±0.0320 |
| 17  | 43.0±1.2247  | 54     | 0.7963±0.0227 | 0.6556±0.0437 | 0.4444±0.0786 | 0.8667±0.0157 | 0.6484±0.0410 |
| 18  | 32.8±0.8367  | 45     | 0.7289±0.0186 | 0.5902±0.0446 | 0.3750±0.0884 | 0.8054±0.0121 | 0.5789±0.0376 |
| 19  | 27.6±0.5477  | 38     | 0.7263±0.0144 | 0.5667±0.0086 | 0.3333±0.0000 | 0.8000±0.0171 | 0.5546±0.0104 |
| 20  | 24.8±0.4472  | 35     | 0.7086±0.0128 | 0.4937±0.0077 | 0.1667±0.0000 | 0.8207±0.0154 | 0.4938±0.0075 |

Table 76: H12O Random Forest with imputation, with missing flags, applying reference values, results of CV, taking best model of grid using F1. Predictions from outcome.

| Day | Corrects     | Totals | Accuracy      | AUC           | Sensitivity   | Specificity   | F1            |
|-----|--------------|--------|---------------|---------------|---------------|---------------|---------------|
| 1   | 333.6±1.1402 | 374    | 0.8920±0.0030 | 0.6603±0.0140 | 0.3440±0.0297 | 0.9765±0.0028 | 0.6997±0.0145 |
| 2   | 335.2±1.6432 | 374    | 0.8963±0.0044 | 0.6627±0.0065 | 0.3440±0.0167 | 0.9815±0.0065 | 0.7062±0.0069 |
| 3   | 339.6±1.1402 | 374    | 0.9080±0.0030 | 0.7237±0.0144 | 0.4720±0.0303 | 0.9753±0.0022 | 0.7632±0.0124 |
| 4   | 338.0±1.2247 | 364    | 0.9286±0.0034 | 0.7760±0.0091 | 0.5702±0.0178 | 0.9817±0.0026 | 0.8166±0.0089 |
| 5   | 312.4±1.5166 | 332    | 0.9410±0.0046 | 0.7887±0.0094 | 0.5897±0.0181 | 0.9877±0.0046 | 0.8343±0.0113 |
| 6   | 275.0±1.5811 | 291    | 0.9450±0.0054 | 0.7979±0.0176 | 0.6059±0.0335 | 0.9899±0.0021 | 0.8448±0.0170 |
| 7   | 232.8±1.3038 | 250    | 0.9312±0.0052 | 0.7993±0.0086 | 0.6276±0.0154 | 0.9710±0.0052 | 0.8204±0.0113 |
| 8   | 188.8±1.3038 | 201    | 0.9393±0.0065 | 0.8215±0.0159 | 0.6667±0.0295 | 0.9763±0.0047 | 0.8449±0.0163 |
| 9   | 147.6±0.8944 | 159    | 0.9283±0.0056 | 0.7972±0.0032 | 0.6190±0.0000 | 0.9754±0.0065 | 0.8274±0.0101 |
| 10  | 126.2±0.8367 | 133    | 0.9489±0.0063 | 0.8145±0.0261 | 0.6375±0.0523 | 0.9915±0.0000 | 0.8603±0.0211 |
| 11  | 107.2±0.8367 | 117    | 0.9162±0.0072 | 0.7700±0.0189 | 0.5733±0.0365 | 0.9667±0.0054 | 0.7947±0.0182 |
| 12  | 91.8±0.4472  | 99     | 0.9273±0.0045 | 0.8014±0.0294 | 0.6308±0.0644 | 0.9721±0.0064 | 0.8261±0.0182 |
| 13  | 82.8±1.3038  | 91     | 0.9099±0.0143 | 0.8513±0.0084 | 0.7692±0.0000 | 0.9333±0.0167 | 0.8285±0.0207 |
| 14  | 70.4±0.5477  | 75     | 0.9387±0.0073 | 0.9298±0.0043 | 0.9167±0.0000 | 0.9429±0.0087 | 0.8950±0.0109 |
| 15  | 62.2±0.4472  | 67     | 0.9284±0.0067 | 0.8768±0.0178 | 0.8000±0.0407 | 0.9536±0.0098 | 0.8713±0.0120 |
| 16  | 54.8±0.8367  | 59     | 0.9288±0.0142 | 0.8696±0.0418 | 0.7800±0.0837 | 0.9592±0.0000 | 0.8717±0.0294 |
| 17  | 52.6±1.1402  | 54     | 0.9741±0.0211 | 0.9222±0.0633 | 0.8444±0.1267 | 1.0000±0.0000 | 0.9481±0.0443 |
| 18  | 41.0±0.7071  | 45     | 0.9111±0.0157 | 0.8970±0.0403 | 0.8750±0.0884 | 0.9189±0.0191 | 0.8607±0.0248 |
| 19  | 35.8±0.4472  | 38     | 0.9421±0.0118 | 0.9115±0.0327 | 0.8667±0.0745 | 0.9563±0.0171 | 0.8953±0.0199 |
| 20  | 31.0±1.0000  | 35     | 0.8857±0.0286 | 0.8649±0.0172 | 0.8333±0.0000 | 0.8966±0.0345 | 0.8228±0.0352 |

Table 77: H12O Random Forest with missing flags, results of CV, taking best model of grid using accuracy. Predictions from admission.

| Day | Corrects     | Totals | Accuracy      | AUC           | Sensitivity   | Specificity   | F1            |
|-----|--------------|--------|---------------|---------------|---------------|---------------|---------------|
| 1   | 356.8±1.4832 | 374    | 0.9540±0.0040 | 0.8889±0.0023 | 0.8000±0.0000 | 0.9778±0.0046 | 0.8984±0.0075 |
| 2   | 361.4±1.3416 | 374    | 0.9663±0.0036 | 0.9044±0.0120 | 0.8200±0.0245 | 0.9889±0.0028 | 0.9237±0.0086 |
| 3   | 357.6±1.1402 | 374    | 0.9561±0.0030 | 0.8664±0.0126 | 0.7440±0.0261 | 0.9889±0.0017 | 0.8971±0.0085 |
| 4   | 349.8±2.1679 | 364    | 0.9610±0.0060 | 0.8634±0.0170 | 0.7319±0.0323 | 0.9950±0.0028 | 0.9033±0.0156 |
| 5   | 313.0±1.2247 | 332    | 0.9428±0.0037 | 0.7853±0.0119 | 0.5795±0.0229 | 0.9911±0.0019 | 0.8361±0.0118 |
| 6   | 269.8±0.8367 | 291    | 0.9271±0.0029 | 0.7240±0.0129 | 0.4588±0.0263 | 0.9891±0.0017 | 0.7775±0.0118 |
| 7   | 231.2±1.0954 | 250    | 0.9248±0.0044 | 0.7597±0.0135 | 0.5448±0.0289 | 0.9747±0.0052 | 0.7925±0.0117 |
| 8   | 180.6±1.6733 | 201    | 0.8985±0.0083 | 0.6758±0.0190 | 0.3833±0.0349 | 0.9684±0.0064 | 0.7090±0.0228 |
| 9   | 140.6±1.1402 | 159    | 0.8843±0.0072 | 0.6265±0.0180 | 0.2762±0.0398 | 0.9768±0.0094 | 0.6609±0.0205 |
| 10  | 118.8±0.8367 | 133    | 0.8932±0.0063 | 0.6426±0.0036 | 0.3125±0.0000 | 0.9726±0.0072 | 0.6774±0.0091 |
| 11  | 104.4±0.5477 | 117    | 0.8923±0.0047 | 0.6653±0.0183 | 0.3600±0.0365 | 0.9706±0.0000 | 0.7005±0.0191 |
| 12  | 85.0±1.0000  | 99     | 0.8586±0.0101 | 0.6378±0.0233 | 0.3385±0.0421 | 0.9372±0.0064 | 0.6529±0.0253 |
| 13  | 80.8±0.8367  | 91     | 0.8879±0.0092 | 0.7103±0.0054 | 0.4615±0.0000 | 0.9590±0.0107 | 0.7387±0.0131 |
| 14  | 66.4±0.5477  | 75     | 0.8853±0.0073 | 0.6619±0.0043 | 0.3333±0.0000 | 0.9905±0.0087 | 0.7089±0.0102 |
| 15  | 60.8±0.8367  | 67     | 0.9075±0.0125 | 0.7839±0.0268 | 0.6000±0.0498 | 0.9679±0.0080 | 0.8130±0.0269 |
| 16  | 48.6±0.5477  | 59     | 0.8237±0.0093 | 0.6710±0.0355 | 0.4400±0.0894 | 0.9020±0.0224 | 0.6746±0.0270 |
| 17  | 44.0±0.7071  | 54     | 0.8148±0.0131 | 0.6044±0.0300 | 0.2889±0.0609 | 0.9200±0.0122 | 0.6164±0.0328 |
| 18  | 34.4±0.8944  | 45     | 0.7644±0.0199 | 0.5628±0.0121 | 0.2500±0.0000 | 0.8757±0.0242 | 0.5670±0.0149 |
| 19  | 28.0±1.2247  | 38     | 0.7368±0.0322 | 0.5729±0.0191 | 0.3333±0.0000 | 0.8125±0.0383 | 0.5629±0.0234 |
| 20  | 26.8±0.8367  | 35     | 0.7657±0.0239 | 0.5282±0.0144 | 0.1667±0.0000 | 0.8897±0.0289 | 0.5299±0.0163 |

Table 78: H12O Random Forest with missing flags, results of CV, taking best model of grid using accuracy. Predictions from outcome.

| Day | Corrects     | Totals | Accuracy      | AUC           | Sensitivity   | Specificity   | F1            |
|-----|--------------|--------|---------------|---------------|---------------|---------------|---------------|
| 1   | 330.8±1.4832 | 374    | 0.8845±0.0040 | 0.6796±0.0091 | 0.4000±0.0200 | 0.9593±0.0051 | 0.7078±0.0089 |
| 2   | 329.8±1.3038 | 374    | 0.8818±0.0035 | 0.6764±0.0114 | 0.3960±0.0261 | 0.9568±0.0053 | 0.7028±0.0100 |
| 3   | 339.2±1.3038 | 374    | 0.9070±0.0035 | 0.7670±0.0083 | 0.5760±0.0167 | 0.9580±0.0035 | 0.7851±0.0077 |
| 4   | 339.2±2.5884 | 364    | 0.9319±0.0071 | 0.8177±0.0187 | 0.6638±0.0350 | 0.9716±0.0039 | 0.8384±0.0175 |
| 5   | 313.0±0.7071 | 332    | 0.9428±0.0021 | 0.8298±0.0069 | 0.6821±0.0140 | 0.9775±0.0019 | 0.8524±0.0057 |
| 6   | 276.0±1.2247 | 291    | 0.9485±0.0042 | 0.8509±0.0089 | 0.7235±0.0161 | 0.9782±0.0035 | 0.8687±0.0100 |
| 7   | 233.0±0.7071 | 250    | 0.9320±0.0028 | 0.8327±0.0084 | 0.7034±0.0189 | 0.9620±0.0040 | 0.8337±0.0058 |
| 8   | 187.0±0.7071 | 201    | 0.9303±0.0035 | 0.8416±0.0154 | 0.7250±0.0373 | 0.9582±0.0076 | 0.8367±0.0065 |
| 9   | 148.0±1.2247 | 159    | 0.9308±0.0077 | 0.8350±0.0204 | 0.7048±0.0398 | 0.9652±0.0061 | 0.8446±0.0175 |
| 10  | 124.4±0.8944 | 133    | 0.9353±0.0067 | 0.8446±0.0275 | 0.7250±0.0559 | 0.9641±0.0038 | 0.8460±0.0198 |
| 11  | 104.2±1.3038 | 117    | 0.8906±0.0111 | 0.7724±0.0181 | 0.6133±0.0298 | 0.9314±0.0098 | 0.7635±0.0204 |
| 12  | 91.0±0.7071  | 99     | 0.9192±0.0071 | 0.8098±0.0208 | 0.6615±0.0421 | 0.9581±0.0064 | 0.8180±0.0170 |
| 13  | 81.0±1.0000  | 91     | 0.8901±0.0110 | 0.8397±0.0276 | 0.7692±0.0544 | 0.9103±0.0091 | 0.8003±0.0207 |
| 14  | 70.2±0.4472  | 75     | 0.9360±0.0060 | 0.9282±0.0035 | 0.9167±0.0000 | 0.9397±0.0071 | 0.8911±0.0089 |
| 15  | 62.0±0.0000  | 67     | 0.9254±0.0000 | 0.8823±0.0000 | 0.8182±0.0000 | 0.9464±0.0000 | 0.8688±0.0000 |
| 16  | 55.6±0.5477  | 59     | 0.9424±0.0093 | 0.9096±0.0274 | 0.8600±0.0548 | 0.9592±0.0000 | 0.8997±0.0184 |
| 17  | 51.6±0.8944  | 54     | 0.9556±0.0166 | 0.9378±0.0290 | 0.9111±0.0497 | 0.9644±0.0122 | 0.9228±0.0283 |
| 18  | 39.6±0.5477  | 45     | 0.8800±0.0122 | 0.8584±0.0342 | 0.8250±0.0685 | 0.8919±0.0000 | 0.8166±0.0228 |
| 19  | 36.0±0.7071  | 38     | 0.9474±0.0186 | 0.9146±0.0396 | 0.8667±0.0745 | 0.9625±0.0140 | 0.9035±0.0330 |
| 20  | 30.8±0.4472  | 35     | 0.8800±0.0128 | 0.8615±0.0077 | 0.8333±0.0000 | 0.8897±0.0154 | 0.8147±0.0150 |

Table 79: H12O Random Forest with missing flags, results of CV, taking best model of grid using F1. Predictions from admission.

| Day | Corrects     | Totals | Accuracy      | AUC           | Sensitivity   | Specificity   | F1            |
|-----|--------------|--------|---------------|---------------|---------------|---------------|---------------|
| 1   | 354.8±0.4472 | 374    | 0.9487±0.0012 | 0.8976±0.0082 | 0.8280±0.0179 | 0.9673±0.0017 | 0.8910±0.0037 |
| 2   | 361.8±1.6432 | 374    | 0.9674±0.0044 | 0.9101±0.0164 | 0.8320±0.0335 | 0.9883±0.0026 | 0.9266±0.0107 |
| 3   | 359.0±0.7071 | 374    | 0.9599±0.0019 | 0.8974±0.0054 | 0.8120±0.0110 | 0.9827±0.0017 | 0.9105±0.0043 |
| 4   | 351.0±1.5811 | 364    | 0.9643±0.0043 | 0.8998±0.0204 | 0.8128±0.0436 | 0.9868±0.0047 | 0.9169±0.0113 |
| 5   | 315.6±1.1402 | 332    | 0.9506±0.0034 | 0.8298±0.0065 | 0.6718±0.0115 | 0.9877±0.0031 | 0.8671±0.0084 |
| 6   | 274.4±1.3416 | 291    | 0.9430±0.0046 | 0.7993±0.0191 | 0.6118±0.0383 | 0.9868±0.0021 | 0.8413±0.0157 |
| 7   | 229.2±0.8367 | 250    | 0.9168±0.0033 | 0.7762±0.0144 | 0.5931±0.0289 | 0.9593±0.0000 | 0.7881±0.0114 |
| 8   | 180.0±1.0000 | 201    | 0.8955±0.0050 | 0.7138±0.0225 | 0.4750±0.0475 | 0.9525±0.0051 | 0.7305±0.0180 |
| 9   | 139.8±0.8367 | 159    | 0.8792±0.0053 | 0.6559±0.0250 | 0.3524±0.0543 | 0.9594±0.0065 | 0.6830±0.0236 |
| 10  | 117.6±1.3416 | 133    | 0.8842±0.0101 | 0.6698±0.0161 | 0.3875±0.0280 | 0.9521±0.0097 | 0.6909±0.0200 |
| 11  | 100.8±1.7889 | 117    | 0.8615±0.0153 | 0.6590±0.0208 | 0.3867±0.0298 | 0.9314±0.0139 | 0.6699±0.0261 |
| 12  | 85.6±1.1402  | 99     | 0.8646±0.0115 | 0.7001±0.0197 | 0.4769±0.0344 | 0.9233±0.0104 | 0.7015±0.0209 |
| 13  | 78.6±0.5477  | 91     | 0.8637±0.0060 | 0.7154±0.0154 | 0.5077±0.0421 | 0.9231±0.0128 | 0.7179±0.0077 |
| 14  | 65.4±1.5166  | 75     | 0.8720±0.0202 | 0.6877±0.0353 | 0.4167±0.0589 | 0.9587±0.0142 | 0.7184±0.0419 |
| 15  | 57.0±0.7071  | 67     | 0.8507±0.0106 | 0.7573±0.0217 | 0.6182±0.0407 | 0.8964±0.0080 | 0.7428±0.0192 |
| 16  | 47.8±1.3038  | 59     | 0.8102±0.0221 | 0.7106±0.0278 | 0.5600±0.0548 | 0.8612±0.0266 | 0.6915±0.0268 |
| 17  | 42.8±1.0954  | 54     | 0.7926±0.0203 | 0.6356±0.0512 | 0.4000±0.0994 | 0.8711±0.0099 | 0.6320±0.0448 |
| 18  | 32.2±0.8367  | 45     | 0.7156±0.0186 | 0.5821±0.0446 | 0.3750±0.0884 | 0.7892±0.0121 | 0.5688±0.0364 |
| 19  | 24.4±0.8944  | 38     | 0.6421±0.0235 | 0.5167±0.0140 | 0.3333±0.0000 | 0.7000±0.0280 | 0.4973±0.0151 |
| 20  | 24.6±0.5477  | 35     | 0.7029±0.0156 | 0.4902±0.0094 | 0.1667±0.0000 | 0.8138±0.0189 | 0.4904±0.0091 |

Table 80: H12O Random Forest with missing flags, results of CV, taking best model of grid using F1. Predictions from outcome.

| Day | Corrects     | Totals | Accuracy      | AUC           | Sensitivity   | Specificity   | F1            |
|-----|--------------|--------|---------------|---------------|---------------|---------------|---------------|
| 1   | 326.8±1.6432 | 374    | 0.8738±0.0044 | 0.6176±0.0096 | 0.2680±0.0179 | 0.9673±0.0035 | 0.6460±0.0120 |
| 2   | 331.4±1.5166 | 374    | 0.8861±0.0041 | 0.6417±0.0098 | 0.3080±0.0179 | 0.9753±0.0022 | 0.6782±0.0123 |
| 3   | 339.4±1.3416 | 374    | 0.9075±0.0036 | 0.7132±0.0132 | 0.4480±0.0268 | 0.9784±0.0022 | 0.7561±0.0127 |
| 4   | 335.0±0.7071 | 364    | 0.9203±0.0019 | 0.7477±0.0085 | 0.5149±0.0178 | 0.9804±0.0014 | 0.7903±0.0072 |
| 5   | 307.0±1.0000 | 332    | 0.9247±0.0030 | 0.7395±0.0142 | 0.4974±0.0292 | 0.9816±0.0019 | 0.7831±0.0121 |
| 6   | 271.2±1.9235 | 291    | 0.9320±0.0066 | 0.8007±0.0133 | 0.6294±0.0263 | 0.9720±0.0070 | 0.8229±0.0149 |
| 7   | 233.0±2.3452 | 250    | 0.9320±0.0094 | 0.8058±0.0201 | 0.6414±0.0393 | 0.9701±0.0094 | 0.8243±0.0218 |
| 8   | 190.0±1.5811 | 201    | 0.9453±0.0079 | 0.8321±0.0244 | 0.6833±0.0475 | 0.9808±0.0051 | 0.8589±0.0214 |
| 9   | 146.6±0.5477 | 159    | 0.9220±0.0034 | 0.7815±0.0125 | 0.5905±0.0261 | 0.9725±0.0032 | 0.8112±0.0098 |
| 10  | 121.2±1.3038 | 133    | 0.9113±0.0098 | 0.7230±0.0294 | 0.4750±0.0559 | 0.9709±0.0047 | 0.7564±0.0298 |
| 11  | 108.0±0.7071 | 117    | 0.9231±0.0060 | 0.7853±0.0035 | 0.6000±0.0000 | 0.9706±0.0069 | 0.8118±0.0105 |
| 12  | 91.8±1.4832  | 99     | 0.9273±0.0150 | 0.8080±0.0367 | 0.6462±0.0688 | 0.9698±0.0104 | 0.8291±0.0368 |
| 13  | 83.8±0.4472  | 91     | 0.9209±0.0049 | 0.8321±0.0153 | 0.7077±0.0344 | 0.9564±0.0070 | 0.8363±0.0098 |
| 14  | 70.2±1.3038  | 75     | 0.9360±0.0174 | 0.9079±0.0404 | 0.8667±0.0745 | 0.9492±0.0071 | 0.8866±0.0327 |
| 15  | 62.0±0.7071  | 67     | 0.9254±0.0106 | 0.8677±0.0246 | 0.7818±0.0498 | 0.9536±0.0098 | 0.8649±0.0197 |
| 16  | 54.4±0.8944  | 59     | 0.9220±0.0152 | 0.8814±0.0269 | 0.8200±0.0447 | 0.9429±0.0091 | 0.8668±0.0259 |
| 17  | 50.4±0.8944  | 54     | 0.9333±0.0166 | 0.8800±0.0461 | 0.8000±0.0930 | 0.9600±0.0099 | 0.8792±0.0337 |
| 18  | 41.6±0.5477  | 45     | 0.9244±0.0122 | 0.9051±0.0074 | 0.8750±0.0000 | 0.9351±0.0148 | 0.8792±0.0165 |
| 19  | 35.8±0.4472  | 38     | 0.9421±0.0118 | 0.9115±0.0327 | 0.8667±0.0745 | 0.9563±0.0171 | 0.8953±0.0199 |
| 20  | 31.4±0.5477  | 35     | 0.8971±0.0156 | 0.8718±0.0094 | 0.8333±0.0000 | 0.9103±0.0189 | 0.8362±0.0202 |

Table 81: H12O Random Forest applying laboratory reference values, results of CV, taking best model of grid using accuracy. Predictions from admission.

| Day | Corrects     | Totals | Accuracy      | AUC           | Sensitivity   | Specificity   | F1            |
|-----|--------------|--------|---------------|---------------|---------------|---------------|---------------|
| 1   | 357.2±1.0954 | 374    | 0.9551±0.0029 | 0.8810±0.0111 | 0.7800±0.0245 | 0.9821±0.0040 | 0.8985±0.0068 |
| 2   | 356.8±1.3038 | 374    | 0.9540±0.0035 | 0.8720±0.0117 | 0.7600±0.0245 | 0.9840±0.0034 | 0.8945±0.0084 |
| 3   | 356.2±1.3038 | 374    | 0.9524±0.0035 | 0.8491±0.0148 | 0.7080±0.0303 | 0.9901±0.0014 | 0.8859±0.0102 |
| 4   | 345.0±2.4495 | 364    | 0.9478±0.0067 | 0.8251±0.0230 | 0.6596±0.0451 | 0.9905±0.0022 | 0.8677±0.0195 |
| 5   | 309.2±1.0954 | 332    | 0.9313±0.0033 | 0.7521±0.0137 | 0.5179±0.0281 | 0.9863±0.0024 | 0.8005±0.0118 |
| 6   | 268.4±1.1402 | 291    | 0.9223±0.0039 | 0.6957±0.0135 | 0.4000±0.0263 | 0.9914±0.0017 | 0.7517±0.0150 |
| 7   | 229.4±1.3416 | 250    | 0.9176±0.0054 | 0.7107±0.0150 | 0.4414±0.0289 | 0.9801±0.0040 | 0.7543±0.0165 |
| 8   | 183.4±0.8944 | 201    | 0.9124±0.0044 | 0.6802±0.0025 | 0.3750±0.0000 | 0.9853±0.0051 | 0.7289±0.0075 |
| 9   | 138.0±1.2247 | 159    | 0.8679±0.0077 | 0.6211±0.0183 | 0.2857±0.0337 | 0.9565±0.0051 | 0.6449±0.0220 |
| 10  | 118.8±0.8367 | 133    | 0.8932±0.0063 | 0.6426±0.0036 | 0.3125±0.0000 | 0.9726±0.0072 | 0.6774±0.0091 |
| 11  | 101.6±1.5166 | 117    | 0.8684±0.0130 | 0.6402±0.0259 | 0.3333±0.0471 | 0.9471±0.0112 | 0.6599±0.0304 |
| 12  | 86.8±1.3038  | 99     | 0.8768±0.0132 | 0.6679±0.0400 | 0.3846±0.0769 | 0.9512±0.0052 | 0.6896±0.0410 |
| 13  | 80.2±0.8367  | 91     | 0.8813±0.0092 | 0.7128±0.0146 | 0.4769±0.0344 | 0.9487±0.0128 | 0.7332±0.0139 |
| 14  | 62.6±0.8944  | 75     | 0.8347±0.0119 | 0.6587±0.0282 | 0.4000±0.0697 | 0.9175±0.0207 | 0.6686±0.0222 |
| 15  | 56.0±1.5811  | 67     | 0.8358±0.0236 | 0.6972±0.0438 | 0.4909±0.0813 | 0.9036±0.0204 | 0.6983±0.0432 |
| 16  | 48.4±1.1402  | 59     | 0.8203±0.0193 | 0.6610±0.0526 | 0.4200±0.1095 | 0.9020±0.0171 | 0.6654±0.0486 |
| 17  | 43.4±0.8944  | 54     | 0.8037±0.0166 | 0.5978±0.0337 | 0.2889±0.0609 | 0.9067±0.0099 | 0.6067±0.0366 |
| 18  | 34.8±0.8367  | 45     | 0.7733±0.0186 | 0.6074±0.0295 | 0.3500±0.0559 | 0.8649±0.0191 | 0.6082±0.0302 |
| 19  | 28.6±0.8944  | 38     | 0.7526±0.0235 | 0.5958±0.0430 | 0.3667±0.0745 | 0.8250±0.0171 | 0.5838±0.0379 |
| 20  | 26.2±0.4472  | 35     | 0.7486±0.0128 | 0.5310±0.0373 | 0.2000±0.0745 | 0.8621±0.0000 | 0.5313±0.0371 |

Table 82: H12O Random Forest applying laboratory reference values, results of CV, taking best model of grid using accuracy. Predictions from outcome.

| Day | Corrects     | Totals | Accuracy      | AUC           | Sensitivity   | Specificity   | F1            |
|-----|--------------|--------|---------------|---------------|---------------|---------------|---------------|
| 1   | 327.2±1.7889 | 374    | 0.8749±0.0048 | 0.6791±0.0155 | 0.4120±0.0303 | 0.9463±0.0017 | 0.6985±0.0151 |
| 2   | 330.0±1.0000 | 374    | 0.8824±0.0027 | 0.7038±0.0131 | 0.4600±0.0283 | 0.9475±0.0031 | 0.7220±0.0105 |
| 3   | 331.6±1.9494 | 374    | 0.8866±0.0052 | 0.7350±0.0060 | 0.5280±0.0110 | 0.9420±0.0059 | 0.7449±0.0081 |
| 4   | 332.0±1.8708 | 364    | 0.9121±0.0051 | 0.7810±0.0129 | 0.6043±0.0243 | 0.9577±0.0036 | 0.7948±0.0122 |
| 5   | 305.0±1.5811 | 332    | 0.9187±0.0048 | 0.8028±0.0150 | 0.6513±0.0292 | 0.9543±0.0031 | 0.8034±0.0125 |
| 6   | 266.6±1.1402 | 291    | 0.9162±0.0039 | 0.8198±0.0066 | 0.6941±0.0161 | 0.9455±0.0055 | 0.8057±0.0061 |
| 7   | 226.4±1.8166 | 250    | 0.9056±0.0073 | 0.8118±0.0155 | 0.6897±0.0345 | 0.9339±0.0094 | 0.7875±0.0125 |
| 8   | 183.2±1.9235 | 201    | 0.9114±0.0096 | 0.8273±0.0094 | 0.7167±0.0186 | 0.9379±0.0113 | 0.8044±0.0153 |
| 9   | 143.4±1.1402 | 159    | 0.9019±0.0072 | 0.7941±0.0077 | 0.6476±0.0261 | 0.9406±0.0119 | 0.7896±0.0070 |
| 10  | 120.6±0.5477 | 133    | 0.9068±0.0041 | 0.8067±0.0113 | 0.6750±0.0280 | 0.9385±0.0072 | 0.7909±0.0062 |
| 11  | 105.0±0.7071 | 117    | 0.8974±0.0060 | 0.8104±0.0160 | 0.6933±0.0365 | 0.9275±0.0088 | 0.7872±0.0105 |
| 12  | 90.2±0.8367  | 99     | 0.9111±0.0085 | 0.8378±0.0332 | 0.7385±0.0688 | 0.9372±0.0064 | 0.8165±0.0210 |
| 13  | 82.8±0.8367  | 91     | 0.9099±0.0092 | 0.8449±0.0178 | 0.7538±0.0344 | 0.9359±0.0091 | 0.8260±0.0167 |
| 14  | 70.6±0.5477  | 75     | 0.9413±0.0073 | 0.9516±0.0228 | 0.9667±0.0456 | 0.9365±0.0000 | 0.9021±0.0137 |
| 15  | 62.0±0.7071  | 67     | 0.9254±0.0106 | 0.8896±0.0217 | 0.8364±0.0407 | 0.9429±0.0080 | 0.8705±0.0181 |
| 16  | 55.0±1.0000  | 59     | 0.9322±0.0169 | 0.9035±0.0314 | 0.8600±0.0548 | 0.9469±0.0112 | 0.8850±0.0290 |
| 17  | 49.2±0.4472  | 54     | 0.9111±0.0083 | 0.9022±0.0050 | 0.8889±0.0000 | 0.9156±0.0099 | 0.8572±0.0112 |
| 18  | 40.2±0.8367  | 45     | 0.8933±0.0186 | 0.8861±0.0113 | 0.8750±0.0000 | 0.8973±0.0226 | 0.8392±0.0227 |
| 19  | 35.6±0.5477  | 38     | 0.9368±0.0144 | 0.9219±0.0433 | 0.9000±0.0913 | 0.9437±0.0140 | 0.8895±0.0266 |
| 20  | 31.0±0.7071  | 35     | 0.8857±0.0202 | 0.8649±0.0122 | 0.8333±0.0000 | 0.8966±0.0244 | 0.8221±0.0249 |

Table 83: H12O Random Forest applying laboratory reference values, results of CV, taking best model of grid using F1. Predictions from admission.

| Day | Corrects     | Totals | Accuracy      | AUC           | Sensitivity   | Specificity   | F1            |
|-----|--------------|--------|---------------|---------------|---------------|---------------|---------------|
| 1   | 354.2±0.8367 | 374    | 0.9471±0.0022 | 0.8883±0.0058 | 0.8080±0.0110 | 0.9685±0.0014 | 0.8863±0.0049 |
| 2   | 357.4±0.8944 | 374    | 0.9556±0.0024 | 0.8881±0.0078 | 0.7960±0.0167 | 0.9802±0.0028 | 0.9010±0.0054 |
| 3   | 359.4±1.1402 | 374    | 0.9610±0.0030 | 0.9081±0.0045 | 0.8360±0.0089 | 0.9802±0.0035 | 0.9145±0.0060 |
| 4   | 343.2±0.4472 | 364    | 0.9429±0.0012 | 0.8621±0.0142 | 0.7532±0.0323 | 0.9710±0.0041 | 0.8700±0.0053 |
| 5   | 314.8±1.4832 | 332    | 0.9482±0.0045 | 0.8351±0.0118 | 0.6872±0.0215 | 0.9829±0.0024 | 0.8640±0.0120 |
| 6   | 271.6±1.9494 | 291    | 0.9333±0.0067 | 0.7785±0.0284 | 0.5765±0.0573 | 0.9805±0.0028 | 0.8154±0.0237 |
| 7   | 230.6±1.3416 | 250    | 0.9224±0.0054 | 0.7674±0.0095 | 0.5655±0.0189 | 0.9692±0.0059 | 0.7926±0.0113 |
| 8   | 177.8±2.2804 | 201    | 0.8846±0.0113 | 0.6859±0.0127 | 0.4250±0.0186 | 0.9469±0.0117 | 0.7020±0.0189 |
| 9   | 138.2±0.8367 | 159    | 0.8692±0.0053 | 0.6663±0.0110 | 0.3905±0.0213 | 0.9420±0.0051 | 0.6834±0.0113 |
| 10  | 115.6±0.8944 | 133    | 0.8692±0.0067 | 0.6667±0.0167 | 0.4000±0.0342 | 0.9333±0.0072 | 0.6749±0.0157 |
| 11  | 97.0±1.2247  | 117    | 0.8291±0.0105 | 0.6631±0.0233 | 0.4400±0.0596 | 0.8863±0.0178 | 0.6483±0.0156 |
| 12  | 80.0±1.7321  | 99     | 0.8081±0.0175 | 0.7002±0.0148 | 0.5538±0.0344 | 0.8465±0.0224 | 0.6581±0.0168 |
| 13  | 72.6±1.6733  | 91     | 0.7978±0.0184 | 0.6897±0.0107 | 0.5385±0.0000 | 0.8410±0.0215 | 0.6550±0.0176 |
| 14  | 58.0±1.0000  | 75     | 0.7733±0.0133 | 0.6492±0.0201 | 0.4667±0.0456 | 0.8317±0.0181 | 0.6286±0.0162 |
| 15  | 52.8±0.8367  | 67     | 0.7881±0.0125 | 0.7198±0.0213 | 0.6182±0.0407 | 0.8214±0.0126 | 0.6777±0.0175 |
| 16  | 43.4±0.5477  | 59     | 0.7356±0.0093 | 0.6418±0.0056 | 0.5000±0.0000 | 0.7837±0.0112 | 0.6110±0.0077 |
| 17  | 39.2±1.3038  | 54     | 0.7259±0.0241 | 0.5778±0.0503 | 0.3556±0.0930 | 0.8000±0.0157 | 0.5651±0.0433 |
| 18  | 31.0±1.2247  | 45     | 0.6889±0.0272 | 0.5757±0.0275 | 0.4000±0.0559 | 0.7514±0.0352 | 0.5561±0.0233 |
| 19  | 25.0±0.7071  | 38     | 0.6579±0.0186 | 0.5667±0.0450 | 0.4333±0.0913 | 0.7000±0.0171 | 0.5298±0.0298 |
| 20  | 25.8±0.4472  | 35     | 0.7371±0.0128 | 0.5374±0.0400 | 0.2333±0.0913 | 0.8414±0.0189 | 0.5352±0.0369 |

Table 84: HM Random Forest applying laboratory reference values, results of CV, taking best model of grid using F1. Predictions from admission.

### 3.2 SVC Daily Results

| Day | Corrects     | Totals | Accuracy      | AUC           | Sensitivity   | Specificity   | F1            |
|-----|--------------|--------|---------------|---------------|---------------|---------------|---------------|
| 1   | 321.8±2.7857 | 374    | 0.8604±0.0074 | 0.8668±0.0054 | 0.4640±0.0294 | 0.9216±0.0046 | 0.6951±0.0164 |
| 2   | 325.8±3.5440 | 374    | 0.8711±0.0095 | 0.8820±0.0110 | 0.6280±0.0240 | 0.9086±0.0075 | 0.7452±0.0165 |
| 3   | 331.8±1.7205 | 374    | 0.8872±0.0046 | 0.8766±0.0093 | 0.6320±0.0240 | 0.9265±0.0023 | 0.7669±0.0105 |
| 4   | 325.8±2.4000 | 364    | 0.8951±0.0066 | 0.8955±0.0081 | 0.7106±0.0217 | 0.9224±0.0081 | 0.7875±0.0100 |
| 5   | 305.0±1.0954 | 332    | 0.9187±0.0033 | 0.9410±0.0050 | 0.7538±0.0126 | 0.9406±0.0051 | 0.8194±0.0042 |
| 6   | 270.8±2.0396 | 291    | 0.9306±0.0070 | 0.9416±0.0052 | 0.8059±0.0478 | 0.9471±0.0053 | 0.8452±0.0168 |
| 7   | 224.8±1.1662 | 250    | 0.8992±0.0047 | 0.9416±0.0097 | 0.7379±0.0352 | 0.9204±0.0084 | 0.7855±0.0067 |
| 8   | 177.6±1.8547 | 201    | 0.8836±0.0092 | 0.9078±0.0106 | 0.7333±0.0204 | 0.9040±0.0095 | 0.7665±0.0142 |
| 9   | 134.2±1.7205 | 159    | 0.8440±0.0108 | 0.8738±0.0102 | 0.6286±0.0467 | 0.8768±0.0079 | 0.7113±0.0203 |
| 10  | 109.4±1.0198 | 133    | 0.8226±0.0077 | 0.8614±0.0168 | 0.6250±0.0000 | 0.8496±0.0087 | 0.6764±0.0079 |
| 11  | 97.0±2.0976  | 117    | 0.8291±0.0179 | 0.8642±0.0115 | 0.5733±0.0533 | 0.8667±0.0147 | 0.6807±0.0294 |
| 12  | 85.0±1.0954  | 99     | 0.8586±0.0111 | 0.8986±0.0195 | 0.6769±0.0576 | 0.8860±0.0114 | 0.7362±0.0201 |
| 13  | 75.6±2.6533  | 91     | 0.8308±0.0292 | 0.8966±0.0183 | 0.7077±0.0576 | 0.8513±0.0385 | 0.7214±0.0304 |
| 14  | 67.0±1.4142  | 75     | 0.8933±0.0189 | 0.9659±0.0104 | 0.9000±0.0333 | 0.8921±0.0254 | 0.8324±0.0227 |
| 15  | 58.8±1.1662  | 67     | 0.8776±0.0174 | 0.9643±0.0118 | 0.8909±0.0364 | 0.8750±0.0160 | 0.8142±0.0240 |
| 16  | 53.4±1.0198  | 59     | 0.9051±0.0173 | 0.9780±0.0121 | 0.9800±0.0400 | 0.8898±0.0208 | 0.8591±0.0226 |
| 17  | 49.4±1.3565  | 54     | 0.9148±0.0251 | 0.9664±0.0112 | 0.9333±0.0544 | 0.9111±0.0281 | 0.8670±0.0355 |
| 18  | 42.0±0.0000  | 45     | 0.9333±0.0000 | 0.9804±0.0072 | 0.9250±0.0612 | 0.9351±0.0132 | 0.8947±0.0043 |
| 19  | 34.6±1.3565  | 38     | 0.9105±0.0357 | 0.9823±0.0071 | 0.9000±0.0816 | 0.9125±0.0306 | 0.8542±0.0563 |
| 20  | 33.6±0.4899  | 35     | 0.9600±0.0140 | 0.9943±0.0051 | 1.0000±0.0000 | 0.9517±0.0169 | 0.9359±0.0206 |

Table 85: H12O SVC baseline results of CV using base features, taking best model of grid using accuracy. Predictions from admission.

| Day | Corrects     | Totals | Accuracy      | AUC           | Sensitivity   | Specificity   | F1            |
|-----|--------------|--------|---------------|---------------|---------------|---------------|---------------|
| 1   | 365.2±1.1662 | 374    | 0.9765±0.0031 | 0.9893±0.0056 | 0.9240±0.0150 | 0.9846±0.0052 | 0.9498±0.0059 |
| 2   | 360.4±1.6248 | 374    | 0.9636±0.0043 | 0.9912±0.0029 | 0.8880±0.0204 | 0.9753±0.0034 | 0.9231±0.0091 |
| 3   | 358.2±2.4000 | 374    | 0.9578±0.0064 | 0.9716±0.0024 | 0.8600±0.0335 | 0.9728±0.0030 | 0.9101±0.0142 |
| 4   | 346.8±2.6382 | 364    | 0.9527±0.0072 | 0.9744±0.0042 | 0.9149±0.0356 | 0.9584±0.0046 | 0.9028±0.0153 |
| 5   | 308.4±2.0591 | 332    | 0.9289±0.0062 | 0.9597±0.0047 | 0.7487±0.0377 | 0.9529±0.0073 | 0.8358±0.0129 |
| 6   | 262.4±3.7202 | 291    | 0.9017±0.0128 | 0.9447±0.0094 | 0.7118±0.0343 | 0.9268±0.0133 | 0.7864±0.0222 |
| 7   | 226.6±2.5768 | 250    | 0.9064±0.0103 | 0.9200±0.0036 | 0.7241±0.0378 | 0.9303±0.0074 | 0.7943±0.0213 |
| 8   | 173.4±2.5768 | 201    | 0.8627±0.0128 | 0.8464±0.0213 | 0.6417±0.0333 | 0.8927±0.0129 | 0.7238±0.0201 |
| 9   | 131.6±1.3565 | 159    | 0.8277±0.0085 | 0.8093±0.0075 | 0.5429±0.0381 | 0.8710±0.0054 | 0.6759±0.0170 |
| 10  | 109.6±1.3565 | 133    | 0.8241±0.0102 | 0.7903±0.0270 | 0.4500±0.0829 | 0.8752±0.0087 | 0.6381±0.0297 |
| 11  | 94.0±2.7568  | 117    | 0.8034±0.0236 | 0.6901±0.0506 | 0.4000±0.0943 | 0.8627±0.0164 | 0.6134±0.0445 |
| 12  | 73.0±1.8974  | 99     | 0.7374±0.0192 | 0.6739±0.0136 | 0.2923±0.0576 | 0.8047±0.0186 | 0.5340±0.0257 |
| 13  | 71.6±0.4899  | 91     | 0.7868±0.0054 | 0.7199±0.0354 | 0.5077±0.0377 | 0.8333±0.0081 | 0.6373±0.0106 |
| 14  | 59.2±2.0396  | 75     | 0.7893±0.0272 | 0.7011±0.0429 | 0.4167±0.1394 | 0.8603±0.0156 | 0.6275±0.0587 |
| 15  | 48.0±1.0954  | 67     | 0.7164±0.0163 | 0.5558±0.0216 | 0.2182±0.0445 | 0.8143±0.0182 | 0.5143±0.0214 |
| 16  | 41.6±1.0198  | 59     | 0.7051±0.0173 | 0.4461±0.0469 | 0.1200±0.0400 | 0.8245±0.0208 | 0.4716±0.0200 |
| 17  | 39.0±1.2649  | 54     | 0.7222±0.0234 | 0.5348±0.0461 | 0.2000±0.0444 | 0.8267±0.0259 | 0.5129±0.0272 |
| 18  | 32.4±1.9596  | 45     | 0.7200±0.0435 | 0.7108±0.0392 | 0.2250±0.0500 | 0.8270±0.0530 | 0.5264±0.0391 |
| 19  | 26.6±1.7436  | 38     | 0.7000±0.0459 | 0.5000±0.0401 | 0.1000±0.0816 | 0.8125±0.0395 | 0.4599±0.0556 |
| 20  | 26.6±1.8547  | 35     | 0.7600±0.0530 | 0.5966±0.0431 | 0.2000±0.0667 | 0.8759±0.0560 | 0.5429±0.0595 |

Table 86: H12O SVC baseline results of CV using base features, taking best model of grid using accuracy. Predictions from outcome.

| Day | Corrects     | Totals | Accuracy      | AUC           | Sensitivity   | Specificity   | F1            |
|-----|--------------|--------|---------------|---------------|---------------|---------------|---------------|
| 1   | 321.8±2.7857 | 374    | 0.8604±0.0074 | 0.8668±0.0054 | 0.4640±0.0294 | 0.9216±0.0046 | 0.6951±0.0164 |
| 2   | 325.8±3.5440 | 374    | 0.8711±0.0095 | 0.8820±0.0110 | 0.6280±0.0240 | 0.9086±0.0075 | 0.7452±0.0165 |
| 3   | 331.8±1.7205 | 374    | 0.8872±0.0046 | 0.8766±0.0093 | 0.6320±0.0240 | 0.9265±0.0023 | 0.7669±0.0105 |
| 4   | 325.8±2.4000 | 364    | 0.8951±0.0066 | 0.8955±0.0081 | 0.7106±0.0217 | 0.9224±0.0081 | 0.7875±0.0100 |
| 5   | 305.0±1.0954 | 332    | 0.9187±0.0033 | 0.9410±0.0050 | 0.7538±0.0126 | 0.9406±0.0051 | 0.8194±0.0042 |
| 6   | 270.8±2.0396 | 291    | 0.9306±0.0070 | 0.9416±0.0052 | 0.8059±0.0478 | 0.9471±0.0053 | 0.8452±0.0168 |
| 7   | 224.8±1.1662 | 250    | 0.8992±0.0047 | 0.9416±0.0097 | 0.7379±0.0352 | 0.9204±0.0084 | 0.7855±0.0067 |
| 8   | 177.6±1.8547 | 201    | 0.8836±0.0092 | 0.9078±0.0106 | 0.7333±0.0204 | 0.9040±0.0095 | 0.7665±0.0142 |
| 9   | 134.2±1.7205 | 159    | 0.8440±0.0108 | 0.8738±0.0102 | 0.6286±0.0467 | 0.8768±0.0079 | 0.7113±0.0203 |
| 10  | 109.4±1.0198 | 133    | 0.8226±0.0077 | 0.8614±0.0168 | 0.6250±0.0000 | 0.8496±0.0087 | 0.6764±0.0079 |
| 11  | 97.0±2.0976  | 117    | 0.8291±0.0179 | 0.8642±0.0115 | 0.5733±0.0533 | 0.8667±0.0147 | 0.6807±0.0294 |
| 12  | 85.0±1.0954  | 99     | 0.8586±0.0111 | 0.8986±0.0195 | 0.6769±0.0576 | 0.8860±0.0114 | 0.7362±0.0201 |
| 13  | 75.6±2.6533  | 91     | 0.8308±0.0292 | 0.8966±0.0183 | 0.7077±0.0576 | 0.8513±0.0385 | 0.7214±0.0304 |
| 14  | 67.0±1.4142  | 75     | 0.8933±0.0189 | 0.9659±0.0104 | 0.9000±0.0333 | 0.8921±0.0254 | 0.8324±0.0227 |
| 15  | 58.8±1.1662  | 67     | 0.8776±0.0174 | 0.9643±0.0118 | 0.8909±0.0364 | 0.8750±0.0160 | 0.8142±0.0240 |
| 16  | 53.4±1.0198  | 59     | 0.9051±0.0173 | 0.9780±0.0121 | 0.9800±0.0400 | 0.8898±0.0208 | 0.8591±0.0226 |
| 17  | 49.4±1.3565  | 54     | 0.9148±0.0251 | 0.9664±0.0112 | 0.9333±0.0544 | 0.9111±0.0281 | 0.8670±0.0355 |
| 18  | 42.0±0.0000  | 45     | 0.9333±0.0000 | 0.9804±0.0072 | 0.9250±0.0612 | 0.9351±0.0132 | 0.8947±0.0043 |
| 19  | 34.6±1.3565  | 38     | 0.9105±0.0357 | 0.9823±0.0071 | 0.9000±0.0816 | 0.9125±0.0306 | 0.8542±0.0563 |
| 20  | 33.6±0.4899  | 35     | 0.9600±0.0140 | 0.9943±0.0051 | 1.0000±0.0000 | 0.9517±0.0169 | 0.9359±0.0206 |

Table 87: H12O SVC baseline results of CV using base features, taking best model of grid using F1. Predictions from admission.

| Day | Corrects     | Totals | Accuracy      | AUC           | Sensitivity   | Specificity   | F1            |
|-----|--------------|--------|---------------|---------------|---------------|---------------|---------------|
| 1   | 365.2±1.1662 | 374    | 0.9765±0.0031 | 0.9893±0.0056 | 0.9240±0.0150 | 0.9846±0.0052 | 0.9498±0.0059 |
| 2   | 360.4±1.6248 | 374    | 0.9636±0.0043 | 0.9912±0.0029 | 0.8880±0.0204 | 0.9753±0.0034 | 0.9231±0.0091 |
| 3   | 358.2±2.4000 | 374    | 0.9578±0.0064 | 0.9716±0.0024 | 0.8600±0.0335 | 0.9728±0.0030 | 0.9101±0.0142 |
| 4   | 346.8±2.6382 | 364    | 0.9527±0.0072 | 0.9744±0.0042 | 0.9149±0.0356 | 0.9584±0.0046 | 0.9028±0.0153 |
| 5   | 308.4±2.0591 | 332    | 0.9289±0.0062 | 0.9597±0.0047 | 0.7487±0.0377 | 0.9529±0.0073 | 0.8358±0.0129 |
| 6   | 262.4±3.7202 | 291    | 0.9017±0.0128 | 0.9447±0.0094 | 0.7118±0.0343 | 0.9268±0.0133 | 0.7864±0.0222 |
| 7   | 226.6±2.5768 | 250    | 0.9064±0.0103 | 0.9200±0.0036 | 0.7241±0.0378 | 0.9303±0.0074 | 0.7943±0.0213 |
| 8   | 173.4±2.5768 | 201    | 0.8627±0.0128 | 0.8464±0.0213 | 0.6417±0.0333 | 0.8927±0.0129 | 0.7238±0.0201 |
| 9   | 131.6±1.3565 | 159    | 0.8277±0.0085 | 0.8093±0.0075 | 0.5429±0.0381 | 0.8710±0.0054 | 0.6759±0.0170 |
| 10  | 109.6±1.3565 | 133    | 0.8241±0.0102 | 0.7903±0.0270 | 0.4500±0.0829 | 0.8752±0.0087 | 0.6381±0.0297 |
| 11  | 94.0±2.7568  | 117    | 0.8034±0.0236 | 0.6901±0.0506 | 0.4000±0.0943 | 0.8627±0.0164 | 0.6134±0.0445 |
| 12  | 73.0±1.8974  | 99     | 0.7374±0.0192 | 0.6739±0.0136 | 0.2923±0.0576 | 0.8047±0.0186 | 0.5340±0.0257 |
| 13  | 71.6±0.4899  | 91     | 0.7868±0.0054 | 0.7199±0.0354 | 0.5077±0.0377 | 0.8333±0.0081 | 0.6373±0.0106 |
| 14  | 59.2±2.0396  | 75     | 0.7893±0.0272 | 0.7011±0.0429 | 0.4167±0.1394 | 0.8603±0.0156 | 0.6275±0.0587 |
| 15  | 48.0±1.0954  | 67     | 0.7164±0.0163 | 0.5558±0.0216 | 0.2182±0.0445 | 0.8143±0.0182 | 0.5143±0.0214 |
| 16  | 41.6±1.0198  | 59     | 0.7051±0.0173 | 0.4461±0.0469 | 0.1200±0.0400 | 0.8245±0.0208 | 0.4716±0.0200 |
| 17  | 39.0±1.2649  | 54     | 0.7222±0.0234 | 0.5348±0.0461 | 0.2000±0.0444 | 0.8267±0.0259 | 0.5129±0.0272 |
| 18  | 32.4±1.9596  | 45     | 0.7200±0.0435 | 0.7108±0.0392 | 0.2250±0.0500 | 0.8270±0.0530 | 0.5264±0.0391 |
| 19  | 26.6±1.7436  | 38     | 0.7000±0.0459 | 0.5000±0.0401 | 0.1000±0.0816 | 0.8125±0.0395 | 0.4599±0.0556 |
| 20  | 26.6±1.8547  | 35     | 0.7600±0.0530 | 0.5966±0.0431 | 0.2000±0.0667 | 0.8759±0.0560 | 0.5429±0.0595 |

Table 88: H12O SVC baseline results of CV using base features, taking best model of grid using F1. Predictions from outcome.

| Day | Corrects     | Totals | Accuracy      | AUC           | Sensitivity   | Specificity   | F1            |
|-----|--------------|--------|---------------|---------------|---------------|---------------|---------------|
| 1   | 327.6±2.0591 | 374    | 0.8759±0.0055 | 0.8567±0.0060 | 0.4040±0.0150 | 0.9488±0.0050 | 0.6977±0.0108 |
| 2   | 332.4±1.7436 | 374    | 0.8888±0.0047 | 0.8729±0.0070 | 0.5960±0.0080 | 0.9340±0.0057 | 0.7624±0.0064 |
| 3   | 337.4±1.3565 | 374    | 0.9021±0.0036 | 0.9011±0.0065 | 0.5800±0.0179 | 0.9519±0.0031 | 0.7785±0.0083 |
| 4   | 330.0±1.6733 | 364    | 0.9066±0.0046 | 0.9187±0.0012 | 0.6255±0.0289 | 0.9483±0.0032 | 0.7899±0.0116 |
| 5   | 305.0±2.0976 | 332    | 0.9187±0.0063 | 0.9415±0.0057 | 0.6718±0.0377 | 0.9515±0.0050 | 0.8068±0.0154 |
| 6   | 272.4±1.2000 | 291    | 0.9361±0.0041 | 0.9465±0.0048 | 0.7412±0.0288 | 0.9619±0.0045 | 0.8470±0.0098 |
| 7   | 231.4±0.8000 | 250    | 0.9256±0.0032 | 0.9528±0.0057 | 0.7448±0.0169 | 0.9493±0.0053 | 0.8283±0.0046 |
| 8   | 183.6±1.3565 | 201    | 0.9134±0.0067 | 0.9379±0.0055 | 0.6833±0.0425 | 0.9446±0.0075 | 0.8018±0.0150 |
| 9   | 143.0±1.0954 | 159    | 0.8994±0.0069 | 0.9102±0.0070 | 0.6857±0.0381 | 0.9319±0.0118 | 0.7921±0.0089 |
| 10  | 115.0±1.2649 | 133    | 0.8647±0.0095 | 0.8838±0.0075 | 0.5875±0.0306 | 0.9026±0.0103 | 0.7163±0.0152 |
| 11  | 104.0±1.6733 | 117    | 0.8889±0.0143 | 0.9084±0.0061 | 0.6000±0.0843 | 0.9314±0.0062 | 0.7574±0.0369 |
| 12  | 89.6±0.8000  | 99     | 0.9051±0.0081 | 0.9150±0.0079 | 0.7231±0.0377 | 0.9326±0.0087 | 0.8056±0.0148 |
| 13  | 80.6±1.8547  | 91     | 0.8857±0.0204 | 0.9316±0.0123 | 0.7231±0.0615 | 0.9128±0.0274 | 0.7886±0.0268 |
| 14  | 68.8±1.3266  | 75     | 0.9173±0.0177 | 0.9741±0.0081 | 0.9000±0.0333 | 0.9206±0.0224 | 0.8639±0.0245 |
| 15  | 61.0±0.6325  | 67     | 0.9104±0.0094 | 0.9831±0.0081 | 0.9818±0.0364 | 0.8964±0.0134 | 0.8632±0.0125 |
| 16  | 53.4±0.8000  | 59     | 0.9051±0.0136 | 0.9857±0.0095 | 1.0000±0.0000 | 0.8857±0.0163 | 0.8607±0.0165 |
| 17  | 50.6±1.3565  | 54     | 0.9370±0.0251 | 0.9837±0.0037 | 0.9333±0.0544 | 0.9378±0.0259 | 0.8975±0.0390 |
| 18  | 41.8±0.7483  | 45     | 0.9289±0.0166 | 0.9872±0.0039 | 0.9000±0.0500 | 0.9351±0.0216 | 0.8875±0.0241 |
| 19  | 35.0±0.6325  | 38     | 0.9211±0.0166 | 0.9885±0.0061 | 0.9667±0.0667 | 0.9125±0.0125 | 0.8727±0.0279 |
| 20  | 33.6±0.4899  | 35     | 0.9600±0.0140 | 1.0000±0.0000 | 1.0000±0.0000 | 0.9517±0.0169 | 0.9359±0.0206 |

Table 89: H12O SVC with imputation, results of CV, taking best model of grid using accuracy. Predictions from admission.

| Day | Corrects     | Totals | Accuracy      | AUC           | Sensitivity   | Specificity   | F1            |
|-----|--------------|--------|---------------|---------------|---------------|---------------|---------------|
| 1   | 368.0±1.0954 | 374    | 0.9840±0.0029 | 0.9940±0.0025 | 0.9400±0.0000 | 0.9907±0.0034 | 0.9654±0.0060 |
| 2   | 366.8±0.9798 | 374    | 0.9807±0.0026 | 0.9940±0.0017 | 0.9320±0.0098 | 0.9883±0.0023 | 0.9586±0.0055 |
| 3   | 360.8±0.7483 | 374    | 0.9647±0.0020 | 0.9799±0.0036 | 0.8720±0.0204 | 0.9790±0.0012 | 0.9240±0.0051 |
| 4   | 344.8±1.1662 | 364    | 0.9473±0.0032 | 0.9748±0.0022 | 0.8213±0.0217 | 0.9659±0.0024 | 0.8852±0.0075 |
| 5   | 314.0±1.8974 | 332    | 0.9458±0.0057 | 0.9643±0.0021 | 0.7385±0.0192 | 0.9734±0.0040 | 0.8657±0.0135 |
| 6   | 269.4±1.8547 | 291    | 0.9258±0.0064 | 0.9610±0.0022 | 0.7353±0.0263 | 0.9510±0.0063 | 0.8281±0.0132 |
| 7   | 230.6±1.4967 | 250    | 0.9224±0.0060 | 0.9340±0.0041 | 0.7103±0.0352 | 0.9502±0.0029 | 0.8177±0.0153 |
| 8   | 181.2±1.4697 | 201    | 0.9015±0.0073 | 0.8794±0.0175 | 0.5750±0.0486 | 0.9458±0.0045 | 0.7629±0.0206 |
| 9   | 135.8±1.1662 | 159    | 0.8541±0.0073 | 0.8214±0.0179 | 0.4571±0.0883 | 0.9145±0.0096 | 0.6824±0.0305 |
| 10  | 116.2±1.1662 | 133    | 0.8737±0.0088 | 0.8528±0.0102 | 0.4500±0.0612 | 0.9316±0.0054 | 0.6944±0.0262 |
| 11  | 96.4±2.4166  | 117    | 0.8239±0.0207 | 0.7311±0.0207 | 0.1733±0.0680 | 0.9196±0.0144 | 0.5518±0.0461 |
| 12  | 77.2±1.3266  | 99     | 0.7798±0.0134 | 0.7456±0.0146 | 0.2615±0.0615 | 0.8581±0.0186 | 0.5536±0.0205 |
| 13  | 74.6±1.7436  | 91     | 0.8198±0.0192 | 0.7400±0.0104 | 0.4308±0.0923 | 0.8846±0.0162 | 0.6487±0.0401 |
| 14  | 61.6±1.6248  | 75     | 0.8213±0.0217 | 0.7452±0.0524 | 0.2833±0.0667 | 0.9238±0.0156 | 0.6167±0.0454 |
| 15  | 51.6±1.4967  | 67     | 0.7701±0.0223 | 0.6110±0.0390 | 0.2364±0.0727 | 0.8750±0.0160 | 0.5579±0.0428 |
| 16  | 44.0±1.4142  | 59     | 0.7458±0.0240 | 0.5224±0.0281 | 0.0600±0.0490 | 0.8857±0.0208 | 0.4639±0.0374 |
| 17  | 41.8±1.1662  | 54     | 0.7741±0.0216 | 0.6119±0.0194 | 0.2222±0.0703 | 0.8844±0.0259 | 0.5555±0.0371 |
| 18  | 35.0±1.0954  | 45     | 0.7778±0.0243 | 0.6959±0.0386 | 0.2500±0.0000 | 0.8919±0.0296 | 0.5778±0.0188 |
| 19  | 27.8±1.1662  | 38     | 0.7316±0.0307 | 0.5760±0.0299 | 0.1667±0.0000 | 0.8375±0.0364 | 0.5026±0.0184 |
| 20  | 27.4±0.8000  | 35     | 0.7829±0.0229 | 0.6655±0.0516 | 0.1667±0.0000 | 0.9103±0.0276 | 0.5418±0.0157 |

Table 90: H12O SVC with imputation, results of CV, taking best model of grid using accuracy. Predictions from outcome.

| Day | Corrects     | Totals | Accuracy      | AUC           | Sensitivity   | Specificity   | F1            |
|-----|--------------|--------|---------------|---------------|---------------|---------------|---------------|
| 1   | 327.6±2.0591 | 374    | 0.8759±0.0055 | 0.8567±0.0060 | 0.4040±0.0150 | 0.9488±0.0050 | 0.6977±0.0108 |
| 2   | 332.4±1.7436 | 374    | 0.8888±0.0047 | 0.8729±0.0070 | 0.5960±0.0080 | 0.9340±0.0057 | 0.7624±0.0064 |
| 3   | 337.4±1.3565 | 374    | 0.9021±0.0036 | 0.9011±0.0065 | 0.5800±0.0179 | 0.9519±0.0031 | 0.7785±0.0083 |
| 4   | 330.0±1.6733 | 364    | 0.9066±0.0046 | 0.9187±0.0012 | 0.6255±0.0289 | 0.9483±0.0032 | 0.7899±0.0116 |
| 5   | 305.0±2.0976 | 332    | 0.9187±0.0063 | 0.9415±0.0057 | 0.6718±0.0377 | 0.9515±0.0050 | 0.8068±0.0154 |
| 6   | 272.4±1.2000 | 291    | 0.9361±0.0041 | 0.9465±0.0048 | 0.7412±0.0288 | 0.9619±0.0045 | 0.8470±0.0098 |
| 7   | 231.4±0.8000 | 250    | 0.9256±0.0032 | 0.9528±0.0057 | 0.7448±0.0169 | 0.9493±0.0053 | 0.8283±0.0046 |
| 8   | 183.6±1.3565 | 201    | 0.9134±0.0067 | 0.9379±0.0055 | 0.6833±0.0425 | 0.9446±0.0075 | 0.8018±0.0150 |
| 9   | 143.0±1.0954 | 159    | 0.8994±0.0069 | 0.9102±0.0070 | 0.6857±0.0381 | 0.9319±0.0118 | 0.7921±0.0089 |
| 10  | 115.0±1.2649 | 133    | 0.8647±0.0095 | 0.8838±0.0075 | 0.5875±0.0306 | 0.9026±0.0103 | 0.7163±0.0152 |
| 11  | 104.0±1.6733 | 117    | 0.8889±0.0143 | 0.9084±0.0061 | 0.6000±0.0843 | 0.9314±0.0062 | 0.7574±0.0369 |
| 12  | 89.6±0.8000  | 99     | 0.9051±0.0081 | 0.9150±0.0079 | 0.7231±0.0377 | 0.9326±0.0087 | 0.8056±0.0148 |
| 13  | 80.6±1.8547  | 91     | 0.8857±0.0204 | 0.9316±0.0123 | 0.7231±0.0615 | 0.9128±0.0274 | 0.7886±0.0268 |
| 14  | 68.8±1.3266  | 75     | 0.9173±0.0177 | 0.9741±0.0081 | 0.9000±0.0333 | 0.9206±0.0224 | 0.8639±0.0245 |
| 15  | 61.0±0.6325  | 67     | 0.9104±0.0094 | 0.9831±0.0081 | 0.9818±0.0364 | 0.8964±0.0134 | 0.8632±0.0125 |
| 16  | 53.4±0.8000  | 59     | 0.9051±0.0136 | 0.9857±0.0095 | 1.0000±0.0000 | 0.8857±0.0163 | 0.8607±0.0165 |
| 17  | 50.6±1.3565  | 54     | 0.9370±0.0251 | 0.9837±0.0037 | 0.9333±0.0544 | 0.9378±0.0259 | 0.8975±0.0390 |
| 18  | 41.8±0.7483  | 45     | 0.9289±0.0166 | 0.9872±0.0039 | 0.9000±0.0500 | 0.9351±0.0216 | 0.8875±0.0241 |
| 19  | 35.0±0.6325  | 38     | 0.9211±0.0166 | 0.9885±0.0061 | 0.9667±0.0667 | 0.9125±0.0125 | 0.8727±0.0279 |
| 20  | 33.6±0.4899  | 35     | 0.9600±0.0140 | 1.0000±0.0000 | 1.0000±0.0000 | 0.9517±0.0169 | 0.9359±0.0206 |

Table 91: H12O SVC with imputation, results of CV, taking best model of grid using F1. Predictions from admission.



| Day | Corrects     | Totals | Accuracy      | AUC           | Sensitivity   | Specificity   | F1            |
|-----|--------------|--------|---------------|---------------|---------------|---------------|---------------|
| 1   | 368.0±1.0954 | 374    | 0.9840±0.0029 | 0.9940±0.0025 | 0.9400±0.0000 | 0.9907±0.0034 | 0.9654±0.0060 |
| 2   | 366.8±0.9798 | 374    | 0.9807±0.0026 | 0.9940±0.0017 | 0.9320±0.0098 | 0.9883±0.0023 | 0.9586±0.0055 |
| 3   | 360.8±0.7483 | 374    | 0.9647±0.0020 | 0.9799±0.0036 | 0.8720±0.0204 | 0.9790±0.0012 | 0.9240±0.0051 |
| 4   | 344.8±1.1662 | 364    | 0.9473±0.0032 | 0.9748±0.0022 | 0.8213±0.0217 | 0.9659±0.0024 | 0.8852±0.0075 |
| 5   | 314.0±1.8974 | 332    | 0.9458±0.0057 | 0.9643±0.0021 | 0.7385±0.0192 | 0.9734±0.0040 | 0.8657±0.0135 |
| 6   | 269.4±1.8547 | 291    | 0.9258±0.0064 | 0.9610±0.0022 | 0.7353±0.0263 | 0.9510±0.0063 | 0.8281±0.0132 |
| 7   | 230.6±1.4967 | 250    | 0.9224±0.0060 | 0.9340±0.0041 | 0.7103±0.0352 | 0.9502±0.0029 | 0.8177±0.0153 |
| 8   | 181.2±1.4697 | 201    | 0.9015±0.0073 | 0.8794±0.0175 | 0.5750±0.0486 | 0.9458±0.0045 | 0.7629±0.0206 |
| 9   | 135.8±1.1662 | 159    | 0.8541±0.0073 | 0.8214±0.0179 | 0.4571±0.0883 | 0.9145±0.0096 | 0.6824±0.0305 |
| 10  | 116.2±1.1662 | 133    | 0.8737±0.0088 | 0.8528±0.0102 | 0.4500±0.0612 | 0.9316±0.0054 | 0.6944±0.0262 |
| 11  | 96.4±2.4166  | 117    | 0.8239±0.0207 | 0.7311±0.0207 | 0.1733±0.0680 | 0.9196±0.0144 | 0.5518±0.0461 |
| 12  | 77.2±1.3266  | 99     | 0.7798±0.0134 | 0.7456±0.0146 | 0.2615±0.0615 | 0.8581±0.0186 | 0.5536±0.0205 |
| 13  | 74.6±1.7436  | 91     | 0.8198±0.0192 | 0.7400±0.0104 | 0.4308±0.0923 | 0.8846±0.0162 | 0.6487±0.0401 |
| 14  | 61.6±1.6248  | 75     | 0.8213±0.0217 | 0.7452±0.0524 | 0.2833±0.0667 | 0.9238±0.0156 | 0.6167±0.0454 |
| 15  | 51.6±1.4967  | 67     | 0.7701±0.0223 | 0.6110±0.0390 | 0.2364±0.0727 | 0.8750±0.0160 | 0.5579±0.0428 |
| 16  | 44.0±1.4142  | 59     | 0.7458±0.0240 | 0.5224±0.0281 | 0.0600±0.0490 | 0.8857±0.0208 | 0.4639±0.0374 |
| 17  | 41.8±1.1662  | 54     | 0.7741±0.0216 | 0.6119±0.0194 | 0.2222±0.0703 | 0.8844±0.0259 | 0.5555±0.0371 |
| 18  | 35.0±1.0954  | 45     | 0.7778±0.0243 | 0.6959±0.0386 | 0.2500±0.0000 | 0.8919±0.0296 | 0.5778±0.0188 |
| 19  | 27.8±1.1662  | 38     | 0.7316±0.0307 | 0.5760±0.0299 | 0.1667±0.0000 | 0.8375±0.0364 | 0.5026±0.0184 |
| 20  | 27.4±0.8000  | 35     | 0.7829±0.0229 | 0.6655±0.0516 | 0.1667±0.0000 | 0.9103±0.0276 | 0.5418±0.0157 |

Table 92: H12O SVC with imputation, results of CV, taking best model of grid using F1. Predictions from outcome.

| Day | Corrects     | Totals | Accuracy      | AUC           | Sensitivity   | Specificity   | F1            |
|-----|--------------|--------|---------------|---------------|---------------|---------------|---------------|
| 1   | 331.4±1.3565 | 374    | 0.8861±0.0036 | 0.8589±0.0040 | 0.2960±0.0150 | 0.9772±0.0042 | 0.6734±0.0087 |
| 2   | 331.8±2.8566 | 374    | 0.8872±0.0076 | 0.8899±0.0042 | 0.3600±0.0310 | 0.9685±0.0045 | 0.6986±0.0212 |
| 3   | 336.2±1.1662 | 374    | 0.8989±0.0031 | 0.9169±0.0026 | 0.4280±0.0240 | 0.9716±0.0012 | 0.7370±0.0117 |
| 4   | 332.0±1.0954 | 364    | 0.9121±0.0030 | 0.9379±0.0027 | 0.5106±0.0000 | 0.9716±0.0035 | 0.7754±0.0050 |
| 5   | 310.4±1.3565 | 332    | 0.9349±0.0041 | 0.9683±0.0016 | 0.6051±0.0308 | 0.9788±0.0014 | 0.8247±0.0132 |
| 6   | 273.0±0.6325 | 291    | 0.9381±0.0022 | 0.9532±0.0045 | 0.6294±0.0235 | 0.9790±0.0031 | 0.8346±0.0069 |
| 7   | 233.6±1.8547 | 250    | 0.9344±0.0074 | 0.9469±0.0059 | 0.6552±0.0378 | 0.9710±0.0046 | 0.8308±0.0193 |
| 8   | 189.2±1.3266 | 201    | 0.9413±0.0066 | 0.9210±0.0065 | 0.6750±0.0312 | 0.9774±0.0051 | 0.8500±0.0166 |
| 9   | 146.8±0.7483 | 159    | 0.9233±0.0047 | 0.9104±0.0051 | 0.6000±0.0233 | 0.9725±0.0054 | 0.8151±0.0104 |
| 10  | 122.6±0.4899 | 133    | 0.9218±0.0037 | 0.9156±0.0058 | 0.5750±0.0250 | 0.9692±0.0042 | 0.7975±0.0094 |
| 11  | 109.0±0.0000 | 117    | 0.9316±0.0000 | 0.9378±0.0026 | 0.6800±0.0267 | 0.9686±0.0039 | 0.8396±0.0037 |
| 12  | 93.0±1.0954  | 99     | 0.9394±0.0111 | 0.9435±0.0021 | 0.8462±0.0000 | 0.9535±0.0127 | 0.8758±0.0182 |
| 13  | 86.2±0.7483  | 91     | 0.9473±0.0082 | 0.9535±0.0051 | 0.7692±0.0000 | 0.9769±0.0096 | 0.8883±0.0145 |
| 14  | 71.4±0.4899  | 75     | 0.9520±0.0065 | 0.9817±0.0029 | 0.7333±0.0333 | 0.9937±0.0078 | 0.9011±0.0133 |
| 15  | 64.6±0.4899  | 67     | 0.9642±0.0073 | 0.9929±0.0022 | 0.8182±0.0000 | 0.9929±0.0087 | 0.9309±0.0127 |
| 16  | 56.2±1.1662  | 59     | 0.9525±0.0198 | 0.9837±0.0092 | 0.8000±0.0632 | 0.9837±0.0153 | 0.9116±0.0362 |
| 17  | 50.2±0.4000  | 54     | 0.9296±0.0074 | 0.9812±0.0051 | 0.8000±0.0444 | 0.9556±0.0000 | 0.8742±0.0150 |
| 18  | 43.8±0.7483  | 45     | 0.9733±0.0166 | 1.0000±0.0000 | 1.0000±0.0000 | 0.9676±0.0202 | 0.9577±0.0258 |
| 19  | 36.8±0.4000  | 38     | 0.9684±0.0105 | 0.9917±0.0026 | 1.0000±0.0000 | 0.9625±0.0125 | 0.9454±0.0165 |
| 20  | 34.0±0.0000  | 35     | 0.9714±0.0000 | 0.9954±0.0023 | 1.0000±0.0000 | 0.9655±0.0000 | 0.9528±0.0000 |

Table 93: H12O SVC with imputation, with missing flags, results of CV, taking best model of grid using accuracy. Predictions from admission.

| Day | Corrects     | Totals | Accuracy      | AUC           | Sensitivity   | Specificity   | F1            |
|-----|--------------|--------|---------------|---------------|---------------|---------------|---------------|
| 1   | 367.0±0.6325 | 374    | 0.9813±0.0017 | 0.9955±0.0004 | 0.9120±0.0098 | 0.9920±0.0015 | 0.9590±0.0037 |
| 2   | 365.2±0.7483 | 374    | 0.9765±0.0020 | 0.9961±0.0004 | 0.9000±0.0126 | 0.9883±0.0012 | 0.9487±0.0045 |
| 3   | 366.4±1.0198 | 374    | 0.9797±0.0027 | 0.9949±0.0006 | 0.9280±0.0204 | 0.9877±0.0000 | 0.9562±0.0062 |
| 4   | 346.4±1.2000 | 364    | 0.9516±0.0033 | 0.9783±0.0020 | 0.7702±0.0248 | 0.9785±0.0013 | 0.8883±0.0087 |
| 5   | 310.8±1.1662 | 332    | 0.9361±0.0035 | 0.9637±0.0024 | 0.6615±0.0192 | 0.9727±0.0031 | 0.8365±0.0089 |
| 6   | 273.6±2.3324 | 291    | 0.9402±0.0080 | 0.9547±0.0040 | 0.6353±0.0353 | 0.9805±0.0049 | 0.8397±0.0212 |
| 7   | 228.8±1.3266 | 250    | 0.9152±0.0053 | 0.9332±0.0041 | 0.5517±0.0308 | 0.9629±0.0044 | 0.7769±0.0144 |
| 8   | 183.8±0.9798 | 201    | 0.9144±0.0049 | 0.8912±0.0085 | 0.4167±0.0000 | 0.9819±0.0055 | 0.7454±0.0083 |
| 9   | 143.6±0.4899 | 159    | 0.9031±0.0031 | 0.8349±0.0144 | 0.3333±0.0000 | 0.9899±0.0035 | 0.7115±0.0048 |
| 10  | 120.2±0.7483 | 133    | 0.9038±0.0056 | 0.8397±0.0095 | 0.3500±0.0306 | 0.9795±0.0087 | 0.7066±0.0117 |
| 11  | 102.0±0.8944 | 117    | 0.8718±0.0076 | 0.7788±0.0127 | 0.1467±0.0267 | 0.9784±0.0114 | 0.5778±0.0120 |
| 12  | 85.6±0.4899  | 99     | 0.8646±0.0049 | 0.7934±0.0146 | 0.0615±0.0576 | 0.9860±0.0087 | 0.5127±0.0449 |
| 13  | 77.6±0.4899  | 91     | 0.8527±0.0054 | 0.7710±0.0076 | 0.0462±0.0377 | 0.9872±0.0081 | 0.4991±0.0321 |
| 14  | 63.8±0.7483  | 75     | 0.8507±0.0100 | 0.8153±0.0109 | 0.0667±0.0624 | 1.0000±0.0000 | 0.5185±0.0566 |
| 15  | 57.0±0.0000  | 67     | 0.8507±0.0000 | 0.7130±0.0218 | 0.0909±0.0000 | 1.0000±0.0000 | 0.5423±0.0000 |
| 16  | 49.0±0.0000  | 59     | 0.8305±0.0000 | 0.6600±0.0140 | 0.0000±0.0000 | 1.0000±0.0000 | 0.4537±0.0000 |
| 17  | 45.0±0.0000  | 54     | 0.8333±0.0000 | 0.6770±0.0088 | 0.0000±0.0000 | 1.0000±0.0000 | 0.4545±0.0000 |
| 18  | 37.2±0.4000  | 45     | 0.8267±0.0089 | 0.7527±0.0174 | 0.0250±0.0500 | 1.0000±0.0000 | 0.4746±0.0467 |
| 19  | 32.0±0.0000  | 38     | 0.8421±0.0000 | 0.7115±0.0488 | 0.0000±0.0000 | 1.0000±0.0000 | 0.4571±0.0000 |
| 20  | 29.0±0.0000  | 35     | 0.8286±0.0000 | 0.7218±0.0414 | 0.0000±0.0000 | 1.0000±0.0000 | 0.4531±0.0000 |

Table 94: H12O SVC with imputation, with missing flags, results of CV, taking best model of grid using accuracy. Predictions from outcome.

| Day | Corrects     | Totals | Accuracy      | AUC           | Sensitivity   | Specificity   | F1            |
|-----|--------------|--------|---------------|---------------|---------------|---------------|---------------|
| 1   | 325.0±3.8471 | 374    | 0.8690±0.0103 | 0.8673±0.0096 | 0.4880±0.0098 | 0.9278±0.0120 | 0.7121±0.0130 |
| 2   | 328.2±1.9391 | 374    | 0.8775±0.0052 | 0.8777±0.0057 | 0.6360±0.0233 | 0.9148±0.0064 | 0.7548±0.0086 |
| 3   | 334.0±1.5492 | 374    | 0.8930±0.0041 | 0.8734±0.0087 | 0.6360±0.0265 | 0.9327±0.0030 | 0.7758±0.0100 |
| 4   | 331.2±2.4819 | 364    | 0.9099±0.0068 | 0.9087±0.0111 | 0.6936±0.0255 | 0.9420±0.0047 | 0.8066±0.0142 |
| 5   | 304.2±2.4819 | 332    | 0.9163±0.0075 | 0.9433±0.0102 | 0.7282±0.0308 | 0.9413±0.0050 | 0.8117±0.0164 |
| 6   | 271.0±0.8944 | 291    | 0.9313±0.0031 | 0.9466±0.0086 | 0.7647±0.0186 | 0.9533±0.0025 | 0.8415±0.0073 |
| 7   | 227.8±2.7129 | 250    | 0.9112±0.0109 | 0.9210±0.0082 | 0.7379±0.0352 | 0.9339±0.0079 | 0.8039±0.0221 |
| 8   | 180.8±2.3152 | 201    | 0.8995±0.0115 | 0.9284±0.0097 | 0.7750±0.0425 | 0.9164±0.0121 | 0.7950±0.0203 |
| 9   | 141.2±1.9391 | 159    | 0.8881±0.0122 | 0.9018±0.0065 | 0.6667±0.0522 | 0.9217±0.0116 | 0.7730±0.0225 |
| 10  | 112.8±0.4000 | 133    | 0.8481±0.0030 | 0.8715±0.0038 | 0.6375±0.0468 | 0.8769±0.0068 | 0.7061±0.0100 |
| 11  | 101.6±1.7436 | 117    | 0.8684±0.0149 | 0.8970±0.0143 | 0.6533±0.0653 | 0.9000±0.0200 | 0.7413±0.0233 |
| 12  | 88.4±1.4967  | 99     | 0.8929±0.0151 | 0.8984±0.0258 | 0.6923±0.0000 | 0.9233±0.0174 | 0.7843±0.0219 |
| 13  | 79.6±1.3565  | 91     | 0.8747±0.0149 | 0.9211±0.0209 | 0.7846±0.0576 | 0.8897±0.0103 | 0.7827±0.0257 |
| 14  | 67.6±1.0198  | 75     | 0.9013±0.0136 | 0.9709±0.0090 | 0.9000±0.0333 | 0.9016±0.0119 | 0.8420±0.0204 |
| 15  | 62.0±1.0954  | 67     | 0.9254±0.0163 | 0.9864±0.0044 | 0.9818±0.0364 | 0.9143±0.0175 | 0.8831±0.0241 |
| 16  | 53.4±1.0198  | 59     | 0.9051±0.0173 | 0.9820±0.0080 | 1.0000±0.0000 | 0.8857±0.0208 | 0.8609±0.0216 |
| 17  | 50.2±1.3266  | 54     | 0.9296±0.0246 | 0.9783±0.0048 | 0.9111±0.1089 | 0.9333±0.0199 | 0.8837±0.0416 |
| 18  | 43.4±0.8000  | 45     | 0.9644±0.0178 | 0.9980±0.0017 | 1.0000±0.0000 | 0.9568±0.0216 | 0.9443±0.0257 |
| 19  | 36.2±0.7483  | 38     | 0.9526±0.0197 | 0.9958±0.0021 | 1.0000±0.0000 | 0.9437±0.0234 | 0.9215±0.0295 |
| 20  | 33.6±0.4899  | 35     | 0.9600±0.0140 | 1.0000±0.0000 | 1.0000±0.0000 | 0.9517±0.0169 | 0.9359±0.0206 |

Table 95: H12O SVC with imputation, with missing flags, results of CV, taking best model of grid using F1. Predictions from admission.

| Day | Corrects     | Totals | Accuracy      | AUC           | Sensitivity   | Specificity   | F1            |
|-----|--------------|--------|---------------|---------------|---------------|---------------|---------------|
| 1   | 368.4±1.8547 | 374    | 0.9850±0.0050 | 0.9940±0.0028 | 0.9360±0.0080 | 0.9926±0.0046 | 0.9676±0.0104 |
| 2   | 364.6±1.6248 | 374    | 0.9749±0.0043 | 0.9943±0.0012 | 0.9120±0.0204 | 0.9846±0.0044 | 0.9461±0.0090 |
| 3   | 363.2±1.1662 | 374    | 0.9711±0.0031 | 0.9738±0.0031 | 0.9080±0.0204 | 0.9809±0.0023 | 0.9385±0.0069 |
| 4   | 347.6±1.4967 | 364    | 0.9549±0.0041 | 0.9724±0.0029 | 0.8851±0.0289 | 0.9653±0.0020 | 0.9045±0.0097 |
| 5   | 305.8±1.6000 | 332    | 0.9211±0.0048 | 0.9600±0.0065 | 0.7077±0.0126 | 0.9495±0.0050 | 0.8167±0.0090 |
| 6   | 267.6±1.8547 | 291    | 0.9196±0.0064 | 0.9606±0.0038 | 0.7412±0.0390 | 0.9432±0.0068 | 0.8184±0.0137 |
| 7   | 223.8±1.3266 | 250    | 0.8952±0.0053 | 0.9182±0.0061 | 0.6828±0.0402 | 0.9231±0.0050 | 0.7706±0.0133 |
| 8   | 176.6±2.3324 | 201    | 0.8786±0.0116 | 0.8809±0.0074 | 0.5333±0.0612 | 0.9254±0.0115 | 0.7211±0.0256 |
| 9   | 132.0±2.4495 | 159    | 0.8302±0.0154 | 0.8167±0.0260 | 0.6000±0.0233 | 0.8652±0.0175 | 0.6910±0.0175 |
| 10  | 112.6±2.1541 | 133    | 0.8466±0.0162 | 0.8330±0.0240 | 0.4125±0.0306 | 0.9060±0.0153 | 0.6532±0.0254 |
| 11  | 92.8±0.7483  | 117    | 0.7932±0.0064 | 0.6987±0.0411 | 0.2933±0.0327 | 0.8667±0.0078 | 0.5729±0.0127 |
| 12  | 77.0±1.0954  | 99     | 0.7778±0.0111 | 0.6834±0.0274 | 0.3538±0.0377 | 0.8419±0.0119 | 0.5814±0.0166 |
| 13  | 71.8±2.5612  | 91     | 0.7890±0.0281 | 0.7026±0.0193 | 0.5231±0.1231 | 0.8333±0.0281 | 0.6414±0.0483 |
| 14  | 58.8±3.1875  | 75     | 0.7840±0.0425 | 0.6947±0.0259 | 0.4000±0.0972 | 0.8571±0.0348 | 0.6225±0.0647 |
| 15  | 48.2±2.3152  | 67     | 0.7194±0.0346 | 0.6036±0.0535 | 0.2364±0.0927 | 0.8143±0.0331 | 0.5226±0.0493 |
| 16  | 42.4±1.4967  | 59     | 0.7186±0.0254 | 0.5045±0.0344 | 0.1000±0.0000 | 0.8449±0.0305 | 0.4705±0.0131 |
| 17  | 39.2±1.7205  | 54     | 0.7259±0.0319 | 0.5610±0.0400 | 0.2889±0.0544 | 0.8133±0.0435 | 0.5453±0.0224 |
| 18  | 33.4±2.1541  | 45     | 0.7422±0.0479 | 0.7209±0.0507 | 0.3250±0.1000 | 0.8324±0.0524 | 0.5753±0.0561 |
| 19  | 26.0±2.6077  | 38     | 0.6842±0.0686 | 0.4646±0.0628 | 0.1667±0.1054 | 0.7812±0.0625 | 0.4790±0.0759 |
| 20  | 28.4±1.3565  | 35     | 0.8114±0.0388 | 0.7540±0.0533 | 0.4000±0.0816 | 0.8966±0.0436 | 0.6549±0.0497 |

Table 96: H12O SVC with imputation, with missing flags, results of CV, taking best model of grid using F1. Predictions from outcome.

| Day | Corrects     | Totals | Accuracy      | AUC           | Sensitivity   | Specificity   | F1            |
|-----|--------------|--------|---------------|---------------|---------------|---------------|---------------|
| 1   | 328.0±0.8944 | 374    | 0.8770±0.0024 | 0.8436±0.0047 | 0.2520±0.0160 | 0.9735±0.0031 | 0.6429±0.0084 |
| 2   | 331.8±0.7483 | 374    | 0.8872±0.0020 | 0.8949±0.0050 | 0.3800±0.0253 | 0.9654±0.0023 | 0.7051±0.0105 |
| 3   | 338.2±1.1662 | 374    | 0.9043±0.0031 | 0.9254±0.0048 | 0.5000±0.0126 | 0.9667±0.0030 | 0.7643±0.0070 |
| 4   | 332.8±0.7483 | 364    | 0.9143±0.0021 | 0.9374±0.0028 | 0.5574±0.0159 | 0.9672±0.0032 | 0.7892±0.0050 |
| 5   | 309.8±2.0396 | 332    | 0.9331±0.0061 | 0.9682±0.0015 | 0.6462±0.0299 | 0.9713±0.0035 | 0.8283±0.0161 |
| 6   | 275.2±0.9798 | 291    | 0.9457±0.0034 | 0.9563±0.0022 | 0.6529±0.0220 | 0.9844±0.0025 | 0.8536±0.0097 |
| 7   | 234.2±1.1662 | 250    | 0.9368±0.0047 | 0.9580±0.0012 | 0.6759±0.0169 | 0.9710±0.0046 | 0.8387±0.0104 |
| 8   | 189.8±1.1662 | 201    | 0.9443±0.0058 | 0.9498±0.0052 | 0.7250±0.0333 | 0.9740±0.0045 | 0.8625±0.0148 |
| 9   | 148.8±1.1662 | 159    | 0.9358±0.0073 | 0.9273±0.0059 | 0.7524±0.0356 | 0.9638±0.0065 | 0.8595±0.0157 |
| 10  | 122.8±0.7483 | 133    | 0.9233±0.0056 | 0.9329±0.0038 | 0.6500±0.0306 | 0.9607±0.0068 | 0.8138±0.0120 |
| 11  | 109.2±0.9798 | 117    | 0.9333±0.0084 | 0.9454±0.0012 | 0.7333±0.0422 | 0.9627±0.0039 | 0.8499±0.0200 |
| 12  | 95.2±0.9798  | 99     | 0.9616±0.0099 | 0.9367±0.0033 | 0.8462±0.0000 | 0.9791±0.0114 | 0.9159±0.0189 |
| 13  | 85.2±0.7483  | 91     | 0.9363±0.0082 | 0.9525±0.0050 | 0.7692±0.0000 | 0.9641±0.0096 | 0.8693±0.0136 |
| 14  | 71.8±0.4000  | 75     | 0.9573±0.0053 | 0.9767±0.0032 | 0.7500±0.0000 | 0.9968±0.0063 | 0.9122±0.0094 |
| 15  | 65.0±0.8944  | 67     | 0.9701±0.0133 | 0.9919±0.0023 | 0.8727±0.0445 | 0.9893±0.0087 | 0.9439±0.0253 |
| 16  | 56.2±0.7483  | 59     | 0.9525±0.0127 | 0.9853±0.0035 | 0.8600±0.0490 | 0.9714±0.0100 | 0.9156±0.0227 |
| 17  | 51.0±0.8944  | 54     | 0.9444±0.0166 | 0.9916±0.0030 | 0.8889±0.0994 | 0.9556±0.0000 | 0.9030±0.0322 |
| 18  | 45.0±0.0000  | 45     | 1.0000±0.0000 | 1.0000±0.0000 | 1.0000±0.0000 | 1.0000±0.0000 | 1.0000±0.0000 |
| 19  | 36.8±0.4000  | 38     | 0.9684±0.0105 | 0.9990±0.0021 | 1.0000±0.0000 | 0.9625±0.0125 | 0.9454±0.0165 |
| 20  | 34.2±0.4000  | 35     | 0.9771±0.0114 | 1.0000±0.0000 | 1.0000±0.0000 | 0.9724±0.0138 | 0.9622±0.0189 |

Table 97: H12O SVC with imputation, with missing flags, applying reference values, results of CV, taking best model of grid using accuracy. Predictions from admission.

| Day | Corrects     | Totals | Accuracy      | AUC           | Sensitivity   | Specificity   | F1            |
|-----|--------------|--------|---------------|---------------|---------------|---------------|---------------|
| 1   | 367.4±0.4899 | 374    | 0.9824±0.0013 | 0.9965±0.0003 | 0.9200±0.0000 | 0.9920±0.0015 | 0.9615±0.0027 |
| 2   | 366.6±0.8000 | 374    | 0.9802±0.0021 | 0.9970±0.0001 | 0.9080±0.0098 | 0.9914±0.0012 | 0.9566±0.0047 |
| 3   | 366.0±0.8944 | 374    | 0.9786±0.0024 | 0.9956±0.0005 | 0.9160±0.0150 | 0.9883±0.0012 | 0.9536±0.0054 |
| 4   | 350.2±0.7483 | 364    | 0.9621±0.0021 | 0.9795±0.0014 | 0.8426±0.0104 | 0.9798±0.0015 | 0.9149±0.0046 |
| 5   | 314.4±1.4967 | 332    | 0.9470±0.0045 | 0.9703±0.0013 | 0.7231±0.0299 | 0.9768±0.0014 | 0.8660±0.0126 |
| 6   | 273.0±1.7889 | 291    | 0.9381±0.0061 | 0.9577±0.0033 | 0.6647±0.0399 | 0.9743±0.0053 | 0.8401±0.0162 |
| 7   | 231.6±1.8547 | 250    | 0.9264±0.0074 | 0.9438±0.0055 | 0.6000±0.0276 | 0.9692±0.0078 | 0.8067±0.0166 |
| 8   | 185.0±0.6325 | 201    | 0.9204±0.0031 | 0.8895±0.0107 | 0.4583±0.0264 | 0.9831±0.0000 | 0.7673±0.0127 |
| 9   | 142.0±0.6325 | 159    | 0.8931±0.0040 | 0.8531±0.0078 | 0.3048±0.0233 | 0.9826±0.0035 | 0.6851±0.0136 |
| 10  | 119.0±1.0954 | 133    | 0.8947±0.0082 | 0.8632±0.0077 | 0.3625±0.0612 | 0.9675±0.0034 | 0.6964±0.0333 |
| 11  | 102.6±1.0198 | 117    | 0.8769±0.0087 | 0.8301±0.0174 | 0.1600±0.0327 | 0.9824±0.0096 | 0.5911±0.0234 |
| 12  | 85.8±0.7483  | 99     | 0.8667±0.0076 | 0.8397±0.0086 | 0.1231±0.0923 | 0.9791±0.0114 | 0.5536±0.0642 |
| 13  | 78.6±0.8000  | 91     | 0.8637±0.0088 | 0.7842±0.0225 | 0.1538±0.1088 | 0.9821±0.0131 | 0.5746±0.0742 |
| 14  | 63.6±0.8000  | 75     | 0.8480±0.0107 | 0.8106±0.0076 | 0.0833±0.0913 | 0.9937±0.0078 | 0.5255±0.0710 |
| 15  | 56.0±0.0000  | 67     | 0.8358±0.0000 | 0.7049±0.0141 | 0.0909±0.0000 | 0.9821±0.0000 | 0.5315±0.0000 |
| 16  | 49.0±0.0000  | 59     | 0.8305±0.0000 | 0.6257±0.0181 | 0.0000±0.0000 | 1.0000±0.0000 | 0.4537±0.0000 |
| 17  | 45.0±0.0000  | 54     | 0.8333±0.0000 | 0.6425±0.0222 | 0.0000±0.0000 | 1.0000±0.0000 | 0.4545±0.0000 |
| 18  | 37.0±0.0000  | 45     | 0.8222±0.0000 | 0.7264±0.0192 | 0.0250±0.0500 | 0.9946±0.0108 | 0.4710±0.0395 |
| 19  | 32.0±0.0000  | 38     | 0.8421±0.0000 | 0.6115±0.0437 | 0.0000±0.0000 | 1.0000±0.0000 | 0.4571±0.0000 |
| 20  | 29.0±0.6325  | 35     | 0.8286±0.0181 | 0.6966±0.0305 | 0.0333±0.0667 | 0.9931±0.0138 | 0.4814±0.0610 |

Table 98: H12O SVC with imputation, with missing flags, applying reference values, results of CV, taking best model of grid using accuracy. Predictions from outcome.

| Day | Corrects     | Totals | Accuracy      | AUC           | Sensitivity   | Specificity   | F1            |
|-----|--------------|--------|---------------|---------------|---------------|---------------|---------------|
| 1   | 326.6±3.0067 | 374    | 0.8733±0.0080 | 0.8531±0.0091 | 0.4680±0.0204 | 0.9358±0.0063 | 0.7123±0.0156 |
| 2   | 328.6±1.4967 | 374    | 0.8786±0.0040 | 0.8816±0.0078 | 0.5600±0.0179 | 0.9278±0.0042 | 0.7410±0.0078 |
| 3   | 333.2±1.9391 | 374    | 0.8909±0.0052 | 0.9047±0.0053 | 0.6040±0.0388 | 0.9352±0.0044 | 0.7667±0.0134 |
| 4   | 329.2±1.7205 | 364    | 0.9044±0.0047 | 0.9127±0.0062 | 0.6894±0.0170 | 0.9363±0.0037 | 0.7976±0.0094 |
| 5   | 308.0±3.0332 | 332    | 0.9277±0.0091 | 0.9549±0.0062 | 0.7897±0.0497 | 0.9461±0.0045 | 0.8389±0.0213 |
| 6   | 268.4±1.4967 | 291    | 0.9223±0.0051 | 0.9467±0.0056 | 0.7235±0.0235 | 0.9486±0.0052 | 0.8205±0.0106 |
| 7   | 227.4±2.6533 | 250    | 0.9096±0.0106 | 0.9346±0.0052 | 0.7103±0.0352 | 0.9357±0.0078 | 0.7972±0.0222 |
| 8   | 184.8±1.7205 | 201    | 0.9194±0.0086 | 0.9430±0.0072 | 0.7750±0.0204 | 0.9390±0.0110 | 0.8254±0.0130 |
| 9   | 141.8±1.1662 | 159    | 0.8918±0.0073 | 0.9054±0.0106 | 0.6667±0.0301 | 0.9261±0.0054 | 0.7782±0.0148 |
| 10  | 117.6±0.8000 | 133    | 0.8842±0.0060 | 0.8683±0.0080 | 0.6250±0.0000 | 0.9197±0.0068 | 0.7492±0.0080 |
| 11  | 104.2±0.4000 | 117    | 0.8906±0.0034 | 0.8959±0.0131 | 0.6667±0.0000 | 0.9235±0.0039 | 0.7731±0.0048 |
| 12  | 87.6±1.4967  | 99     | 0.8848±0.0151 | 0.9059±0.0208 | 0.7231±0.0377 | 0.9093±0.0154 | 0.7777±0.0232 |
| 13  | 80.2±1.7205  | 91     | 0.8813±0.0189 | 0.9221±0.0126 | 0.7538±0.0576 | 0.9026±0.0174 | 0.7871±0.0309 |
| 14  | 68.0±0.6325  | 75     | 0.9067±0.0084 | 0.9616±0.0063 | 0.8000±0.0408 | 0.9270±0.0078 | 0.8380±0.0152 |
| 15  | 62.0±1.4142  | 67     | 0.9254±0.0211 | 0.9708±0.0062 | 0.8909±0.0364 | 0.9321±0.0237 | 0.8764±0.0311 |
| 16  | 52.2±1.1662  | 59     | 0.8847±0.0198 | 0.9755±0.0043 | 0.9000±0.0000 | 0.8816±0.0238 | 0.8272±0.0241 |
| 17  | 51.4±0.8000  | 54     | 0.9519±0.0148 | 0.9802±0.0027 | 0.9778±0.0444 | 0.9467±0.0178 | 0.9212±0.0221 |
| 18  | 43.4±0.8000  | 45     | 0.9644±0.0178 | 1.0000±0.0000 | 1.0000±0.0000 | 0.9568±0.0216 | 0.9443±0.0257 |
| 19  | 35.8±0.7483  | 38     | 0.9421±0.0197 | 1.0000±0.0000 | 1.0000±0.0000 | 0.9313±0.0234 | 0.9059±0.0291 |
| 20  | 35.0±0.0000  | 35     | 1.0000±0.0000 | 1.0000±0.0000 | 1.0000±0.0000 | 1.0000±0.0000 | 1.0000±0.0000 |

Table 99: H12O SVC with imputation, with missing flags, applying reference values, results of CV, taking best model of grid using F1. Predictions from admission.

| Day | Corrects     | Totals | Accuracy      | AUC           | Sensitivity   | Specificity   | F1            |
|-----|--------------|--------|---------------|---------------|---------------|---------------|---------------|
| 1   | 368.6±1.3565 | 374    | 0.9856±0.0036 | 0.9939±0.0022 | 0.9360±0.0150 | 0.9932±0.0036 | 0.9686±0.0077 |
| 2   | 365.6±1.3565 | 374    | 0.9775±0.0036 | 0.9944±0.0012 | 0.9160±0.0233 | 0.9870±0.0030 | 0.9515±0.0080 |
| 3   | 360.8±1.1662 | 374    | 0.9647±0.0031 | 0.9790±0.0045 | 0.8880±0.0160 | 0.9765±0.0031 | 0.9251±0.0064 |
| 4   | 346.6±2.7276 | 364    | 0.9522±0.0075 | 0.9754±0.0025 | 0.9277±0.0104 | 0.9558±0.0082 | 0.9031±0.0135 |
| 5   | 306.6±2.2450 | 332    | 0.9235±0.0068 | 0.9596±0.0077 | 0.7179±0.0162 | 0.9509±0.0060 | 0.8223±0.0135 |
| 6   | 268.4±3.2619 | 291    | 0.9223±0.0112 | 0.9514±0.0059 | 0.7412±0.0471 | 0.9463±0.0067 | 0.8230±0.0253 |
| 7   | 227.0±0.8944 | 250    | 0.9080±0.0036 | 0.9220±0.0128 | 0.6897±0.0218 | 0.9367±0.0064 | 0.7912±0.0040 |
| 8   | 181.0±2.6077 | 201    | 0.9005±0.0130 | 0.8809±0.0115 | 0.5917±0.0312 | 0.9424±0.0131 | 0.7657±0.0234 |
| 9   | 136.0±2.0000 | 159    | 0.8553±0.0126 | 0.8466±0.0128 | 0.5810±0.0190 | 0.8971±0.0141 | 0.7153±0.0163 |
| 10  | 113.8±1.6000 | 133    | 0.8556±0.0120 | 0.8091±0.0249 | 0.5000±0.0685 | 0.9043±0.0126 | 0.6852±0.0252 |
| 11  | 94.6±1.6248  | 117    | 0.8085±0.0139 | 0.6946±0.0324 | 0.3067±0.0327 | 0.8824±0.0139 | 0.5904±0.0200 |
| 12  | 78.0±1.5492  | 99     | 0.7879±0.0156 | 0.7603±0.0168 | 0.4462±0.0897 | 0.8395±0.0200 | 0.6131±0.0286 |
| 13  | 72.2±1.3266  | 91     | 0.7934±0.0146 | 0.7272±0.0277 | 0.4769±0.0576 | 0.8462±0.0081 | 0.6363±0.0270 |
| 14  | 57.8±1.9391  | 75     | 0.7707±0.0259 | 0.6812±0.0255 | 0.4500±0.1130 | 0.8317±0.0162 | 0.6210±0.0505 |
| 15  | 47.4±2.4166  | 67     | 0.7075±0.0361 | 0.5877±0.0262 | 0.3273±0.0927 | 0.7821±0.0484 | 0.5410±0.0357 |
| 16  | 42.2±1.1662  | 59     | 0.7153±0.0198 | 0.5106±0.0513 | 0.2200±0.0980 | 0.8163±0.0183 | 0.5149±0.0433 |
| 17  | 38.4±1.0198  | 54     | 0.7111±0.0189 | 0.4780±0.0404 | 0.1778±0.0544 | 0.8178±0.0166 | 0.4974±0.0302 |
| 18  | 31.6±1.8547  | 45     | 0.7022±0.0412 | 0.6182±0.0649 | 0.4250±0.1000 | 0.7622±0.0524 | 0.5715±0.0390 |
| 19  | 24.8±2.0396  | 38     | 0.6526±0.0537 | 0.4365±0.0603 | 0.2667±0.0816 | 0.7250±0.0500 | 0.4886±0.0540 |
| 20  | 27.2±1.7205  | 35     | 0.7771±0.0492 | 0.6989±0.0745 | 0.3000±0.1247 | 0.8759±0.0468 | 0.5911±0.0723 |

Table 100: H12O SVC with imputation, with missing flags, applying reference values, results of CV, taking best model of grid using F1. Predictions from outcome.

| Day | Corrects     | Totals | Accuracy      | AUC           | Sensitivity   | Specificity   | F1            |
|-----|--------------|--------|---------------|---------------|---------------|---------------|---------------|
| 1   | 331.6±1.2000 | 374    | 0.8866±0.0032 | 0.8615±0.0048 | 0.3240±0.0150 | 0.9735±0.0050 | 0.6850±0.0059 |
| 2   | 333.4±1.2000 | 374    | 0.8914±0.0032 | 0.8984±0.0048 | 0.3960±0.0233 | 0.9679±0.0042 | 0.7163±0.0098 |
| 3   | 335.4±1.0198 | 374    | 0.8968±0.0027 | 0.9165±0.0029 | 0.4320±0.0271 | 0.9685±0.0023 | 0.7349±0.0112 |
| 4   | 330.2±0.7483 | 364    | 0.9071±0.0021 | 0.9370±0.0021 | 0.5149±0.0085 | 0.9653±0.0020 | 0.7682±0.0046 |
| 5   | 309.0±0.8944 | 332    | 0.9307±0.0027 | 0.9682±0.0025 | 0.5692±0.0192 | 0.9788±0.0014 | 0.8100±0.0087 |
| 6   | 271.6±0.8000 | 291    | 0.9333±0.0027 | 0.9494±0.0027 | 0.6059±0.0235 | 0.9767±0.0000 | 0.8212±0.0094 |
| 7   | 231.2±0.9798 | 250    | 0.9248±0.0039 | 0.9456±0.0069 | 0.6483±0.0338 | 0.9611±0.0022 | 0.8119±0.0124 |
| 8   | 187.6±0.8000 | 201    | 0.9333±0.0040 | 0.9162±0.0072 | 0.6500±0.0204 | 0.9718±0.0036 | 0.8310±0.0097 |
| 9   | 144.8±0.7483 | 159    | 0.9107±0.0047 | 0.9010±0.0060 | 0.5714±0.0301 | 0.9623±0.0071 | 0.7887±0.0097 |
| 10  | 121.2±1.1662 | 133    | 0.9113±0.0088 | 0.9139±0.0090 | 0.5375±0.0500 | 0.9624±0.0042 | 0.7713±0.0248 |
| 11  | 109.2±0.9798 | 117    | 0.9333±0.0084 | 0.9290±0.0032 | 0.6800±0.0267 | 0.9706±0.0088 | 0.8430±0.0167 |
| 12  | 92.6±0.4899  | 99     | 0.9354±0.0049 | 0.9410±0.0040 | 0.8462±0.0000 | 0.9488±0.0057 | 0.8686±0.0081 |
| 13  | 84.6±1.4967  | 91     | 0.9297±0.0164 | 0.9404±0.0072 | 0.7692±0.0000 | 0.9564±0.0192 | 0.8593±0.0258 |
| 14  | 70.8±0.7483  | 75     | 0.9440±0.0100 | 0.9820±0.0023 | 0.8167±0.0624 | 0.9683±0.0000 | 0.8946±0.0212 |
| 15  | 64.6±0.4899  | 67     | 0.9642±0.0073 | 0.9906±0.0016 | 0.8182±0.0000 | 0.9929±0.0087 | 0.9309±0.0127 |
| 16  | 55.4±0.8000  | 59     | 0.9390±0.0136 | 0.9812±0.0073 | 0.7800±0.0400 | 0.9714±0.0100 | 0.8881±0.0247 |
| 17  | 51.0±0.0000  | 54     | 0.9444±0.0000 | 0.9699±0.0098 | 0.8889±0.0000 | 0.9556±0.0000 | 0.9042±0.0000 |
| 18  | 43.8±0.4000  | 45     | 0.9733±0.0089 | 0.9980±0.0017 | 1.0000±0.0000 | 0.9676±0.0108 | 0.9571±0.0133 |
| 19  | 36.2±0.4000  | 38     | 0.9526±0.0105 | 0.9885±0.0039 | 0.9667±0.0667 | 0.9500±0.0153 | 0.9184±0.0181 |
| 20  | 34.0±0.0000  | 35     | 0.9714±0.0000 | 0.9897±0.0023 | 1.0000±0.0000 | 0.9655±0.0000 | 0.9528±0.0000 |

Table 101: H12O SVC with missing flags, results of CV, taking best model of grid using accuracy. Predictions from admission.

| Day | Corrects     | Totals | Accuracy      | AUC           | Sensitivity   | Specificity   | F1            |
|-----|--------------|--------|---------------|---------------|---------------|---------------|---------------|
| 1   | 362.4±0.8000 | 374    | 0.9690±0.0021 | 0.9899±0.0004 | 0.8440±0.0080 | 0.9883±0.0023 | 0.9307±0.0045 |
| 2   | 364.2±0.7483 | 374    | 0.9738±0.0020 | 0.9946±0.0005 | 0.8800±0.0126 | 0.9883±0.0012 | 0.9423±0.0046 |
| 3   | 364.4±1.0198 | 374    | 0.9743±0.0027 | 0.9937±0.0006 | 0.8920±0.0160 | 0.9870±0.0012 | 0.9440±0.0061 |
| 4   | 348.4±0.8000 | 364    | 0.9571±0.0022 | 0.9776±0.0013 | 0.8043±0.0208 | 0.9798±0.0015 | 0.9022±0.0060 |
| 5   | 311.6±0.8000 | 332    | 0.9386±0.0024 | 0.9647±0.0018 | 0.6462±0.0192 | 0.9775±0.0017 | 0.8387±0.0074 |
| 6   | 273.8±0.4000 | 291    | 0.9409±0.0014 | 0.9526±0.0047 | 0.6588±0.0144 | 0.9782±0.0031 | 0.8447±0.0022 |
| 7   | 229.6±1.8547 | 250    | 0.9184±0.0074 | 0.9361±0.0040 | 0.5793±0.0258 | 0.9629±0.0053 | 0.7883±0.0178 |
| 8   | 183.4±1.4967 | 201    | 0.9124±0.0074 | 0.9052±0.0088 | 0.4083±0.0167 | 0.9808±0.0085 | 0.7396±0.0148 |
| 9   | 142.6±1.8547 | 159    | 0.8969±0.0117 | 0.8562±0.0145 | 0.3333±0.0301 | 0.9826±0.0098 | 0.7022±0.0266 |
| 10  | 120.0±0.8944 | 133    | 0.9023±0.0067 | 0.8498±0.0095 | 0.3500±0.0306 | 0.9778±0.0087 | 0.7044±0.0151 |
| 11  | 101.8±0.4000 | 117    | 0.8701±0.0034 | 0.7898±0.0121 | 0.1733±0.0327 | 0.9725±0.0039 | 0.5912±0.0203 |
| 12  | 85.6±0.8000  | 99     | 0.8646±0.0081 | 0.8016±0.0119 | 0.1077±0.0615 | 0.9791±0.0087 | 0.5464±0.0482 |
| 13  | 77.4±0.8000  | 91     | 0.8505±0.0088 | 0.7692±0.0055 | 0.0923±0.0576 | 0.9769±0.0126 | 0.5303±0.0441 |
| 14  | 64.8±0.4000  | 75     | 0.8640±0.0053 | 0.8241±0.0161 | 0.1500±0.0333 | 1.0000±0.0000 | 0.5922±0.0277 |
| 15  | 56.6±0.4899  | 67     | 0.8448±0.0073 | 0.7182±0.0221 | 0.1091±0.0364 | 0.9893±0.0087 | 0.5498±0.0262 |
| 16  | 48.8±0.4000  | 59     | 0.8271±0.0068 | 0.6739±0.0150 | 0.0000±0.0000 | 0.9959±0.0082 | 0.4527±0.0020 |
| 17  | 45.0±0.0000  | 54     | 0.8333±0.0000 | 0.6840±0.0245 | 0.0000±0.0000 | 1.0000±0.0000 | 0.4545±0.0000 |
| 18  | 37.0±0.0000  | 45     | 0.8222±0.0000 | 0.7973±0.0200 | 0.0000±0.0000 | 1.0000±0.0000 | 0.4512±0.0000 |
| 19  | 32.0±0.0000  | 38     | 0.8421±0.0000 | 0.7375±0.0392 | 0.0000±0.0000 | 1.0000±0.0000 | 0.4571±0.0000 |
| 20  | 28.8±0.7483  | 35     | 0.8229±0.0214 | 0.7483±0.0516 | 0.0333±0.0667 | 0.9862±0.0169 | 0.4797±0.0619 |

Table 102: H12O SVC with missing flags, results of CV, taking best model of grid using accuracy. Predictions from outcome.

| Day | Corrects     | Totals | Accuracy      | AUC           | Sensitivity   | Specificity   | F1            |
|-----|--------------|--------|---------------|---------------|---------------|---------------|---------------|
| 1   | 325.2±2.9257 | 374    | 0.8695±0.0078 | 0.8797±0.0070 | 0.5520±0.0371 | 0.9185±0.0060 | 0.7274±0.0170 |
| 2   | 326.6±4.3635 | 374    | 0.8733±0.0117 | 0.8911±0.0072 | 0.6480±0.0431 | 0.9080±0.0109 | 0.7516±0.0209 |
| 3   | 332.0±1.2649 | 374    | 0.8877±0.0034 | 0.8607±0.0049 | 0.6440±0.0265 | 0.9253±0.0036 | 0.7698±0.0085 |
| 4   | 326.6±1.0198 | 364    | 0.8973±0.0028 | 0.9016±0.0061 | 0.7234±0.0381 | 0.9230±0.0047 | 0.7923±0.0086 |
| 5   | 303.6±1.3565 | 332    | 0.9145±0.0041 | 0.9457±0.0044 | 0.7795±0.0261 | 0.9324±0.0073 | 0.8161±0.0051 |
| 6   | 272.0±1.2649 | 291    | 0.9347±0.0043 | 0.9431±0.0061 | 0.7882±0.0471 | 0.9541±0.0038 | 0.8502±0.0128 |
| 7   | 224.8±0.7483 | 250    | 0.8992±0.0030 | 0.9262±0.0109 | 0.7655±0.0552 | 0.9167±0.0093 | 0.7894±0.0072 |
| 8   | 176.4±2.3324 | 201    | 0.8776±0.0116 | 0.9137±0.0089 | 0.7583±0.0553 | 0.8938±0.0097 | 0.7622±0.0218 |
| 9   | 134.8±2.2271 | 159    | 0.8478±0.0140 | 0.8794±0.0092 | 0.6190±0.0426 | 0.8826±0.0116 | 0.7140±0.0237 |
| 10  | 113.8±0.7483 | 133    | 0.8556±0.0056 | 0.8636±0.0158 | 0.6500±0.0306 | 0.8838±0.0068 | 0.7175±0.0097 |
| 11  | 96.2±1.7205  | 117    | 0.8222±0.0147 | 0.8518±0.0114 | 0.5467±0.0499 | 0.8627±0.0196 | 0.6675±0.0162 |
| 12  | 89.2±0.9798  | 99     | 0.9010±0.0099 | 0.8934±0.0285 | 0.6923±0.0487 | 0.9326±0.0087 | 0.7948±0.0204 |
| 13  | 77.0±1.2649  | 91     | 0.8462±0.0139 | 0.9138±0.0196 | 0.7692±0.0487 | 0.8590±0.0140 | 0.7469±0.0204 |
| 14  | 68.4±1.9596  | 75     | 0.9120±0.0261 | 0.9772±0.0118 | 0.9667±0.0408 | 0.9016±0.0273 | 0.8629±0.0358 |
| 15  | 60.4±0.8000  | 67     | 0.9015±0.0119 | 0.9766±0.0090 | 0.9091±0.0000 | 0.9000±0.0143 | 0.8455±0.0150 |
| 16  | 51.6±2.2450  | 59     | 0.8746±0.0381 | 0.9751±0.0115 | 0.8800±0.0748 | 0.8735±0.0327 | 0.8134±0.0520 |
| 17  | 49.4±1.3565  | 54     | 0.9148±0.0251 | 0.9630±0.0167 | 0.8667±0.0444 | 0.9244±0.0227 | 0.8608±0.0376 |
| 18  | 42.6±0.4899  | 45     | 0.9467±0.0109 | 0.9959±0.0025 | 1.0000±0.0000 | 0.9351±0.0132 | 0.9183±0.0150 |
| 19  | 35.8±0.9798  | 38     | 0.9421±0.0258 | 0.9906±0.0069 | 1.0000±0.0000 | 0.9313±0.0306 | 0.9067±0.0383 |
| 20  | 33.6±0.4899  | 35     | 0.9600±0.0140 | 0.9943±0.0051 | 1.0000±0.0000 | 0.9517±0.0169 | 0.9359±0.0206 |

Table 103: H12O SVC with missing flags, results of CV, taking best model of grid using F1. Predictions from admission.

| Day | Corrects     | Totals | Accuracy      | AUC           | Sensitivity   | Specificity   | F1            |
|-----|--------------|--------|---------------|---------------|---------------|---------------|---------------|
| 1   | 365.4±1.3565 | 374    | 0.9770±0.0036 | 0.9893±0.0055 | 0.9280±0.0204 | 0.9846±0.0052 | 0.9510±0.0072 |
| 2   | 362.8±0.7483 | 374    | 0.9701±0.0020 | 0.9920±0.0023 | 0.8960±0.0320 | 0.9815±0.0044 | 0.9357±0.0050 |
| 3   | 359.8±1.3266 | 374    | 0.9620±0.0035 | 0.9722±0.0040 | 0.8760±0.0150 | 0.9753±0.0039 | 0.9193±0.0071 |
| 4   | 347.0±2.1909 | 364    | 0.9533±0.0060 | 0.9719±0.0017 | 0.8936±0.0301 | 0.9621±0.0066 | 0.9023±0.0118 |
| 5   | 307.4±4.8415 | 332    | 0.9259±0.0146 | 0.9551±0.0058 | 0.7282±0.0417 | 0.9522±0.0110 | 0.8283±0.0310 |
| 6   | 264.0±1.6733 | 291    | 0.9072±0.0058 | 0.9393±0.0102 | 0.7588±0.0288 | 0.9268±0.0029 | 0.8014±0.0129 |
| 7   | 222.6±3.3226 | 250    | 0.8904±0.0133 | 0.9175±0.0072 | 0.6621±0.0402 | 0.9204±0.0106 | 0.7606±0.0261 |
| 8   | 172.4±0.8000 | 201    | 0.8577±0.0040 | 0.8794±0.0141 | 0.6333±0.0612 | 0.8881±0.0083 | 0.7154±0.0131 |
| 9   | 132.2±2.7857 | 159    | 0.8314±0.0175 | 0.8216±0.0206 | 0.6190±0.0426 | 0.8638±0.0180 | 0.6961±0.0241 |
| 10  | 108.8±1.1662 | 133    | 0.8180±0.0088 | 0.7728±0.0249 | 0.3875±0.0250 | 0.8769±0.0087 | 0.6167±0.0131 |
| 11  | 92.0±0.0000  | 117    | 0.7863±0.0000 | 0.6961±0.0431 | 0.4000±0.0000 | 0.8431±0.0000 | 0.5987±0.0000 |
| 12  | 73.8±1.8330  | 99     | 0.7455±0.0185 | 0.6773±0.0317 | 0.4000±0.0576 | 0.7977±0.0158 | 0.5686±0.0268 |
| 13  | 71.8±1.9391  | 91     | 0.7890±0.0213 | 0.7193±0.0108 | 0.4769±0.0576 | 0.8410±0.0174 | 0.6327±0.0322 |
| 14  | 58.0±2.2804  | 75     | 0.7733±0.0304 | 0.6910±0.0470 | 0.3500±0.0624 | 0.8540±0.0273 | 0.5980±0.0435 |
| 15  | 46.4±2.1541  | 67     | 0.6925±0.0322 | 0.5948±0.0310 | 0.2182±0.0727 | 0.7857±0.0319 | 0.4996±0.0406 |
| 16  | 42.8±1.1662  | 59     | 0.7254±0.0198 | 0.5294±0.0301 | 0.1000±0.0000 | 0.8531±0.0238 | 0.4739±0.0103 |
| 17  | 39.0±1.6733  | 54     | 0.7222±0.0310 | 0.5610±0.0424 | 0.1556±0.0544 | 0.8356±0.0301 | 0.4960±0.0375 |
| 18  | 33.4±1.6248  | 45     | 0.7422±0.0361 | 0.7149±0.0476 | 0.3000±0.1275 | 0.8378±0.0296 | 0.5655±0.0631 |
| 19  | 26.2±1.1662  | 38     | 0.6895±0.0307 | 0.5323±0.0559 | 0.2000±0.0667 | 0.7812±0.0342 | 0.4887±0.0318 |
| 20  | 28.4±1.0198  | 35     | 0.8114±0.0291 | 0.7517±0.0750 | 0.3333±0.1054 | 0.9103±0.0276 | 0.6309±0.0590 |

Table 104: H12O SVC with missing flags, results of CV, taking best model of grid using F1. Predictions from outcome.

| Day | Corrects     | Totals | Accuracy      | AUC           | Sensitivity   | Specificity   | F1            |
|-----|--------------|--------|---------------|---------------|---------------|---------------|---------------|
| 1   | 330.0±1.0954 | 374    | 0.8824±0.0029 | 0.8421±0.0024 | 0.2920±0.0325 | 0.9735±0.0025 | 0.6664±0.0166 |
| 2   | 333.6±2.5768 | 374    | 0.8920±0.0069 | 0.9005±0.0022 | 0.4320±0.0325 | 0.9630±0.0034 | 0.7278±0.0190 |
| 3   | 338.6±0.8000 | 374    | 0.9053±0.0021 | 0.9157±0.0058 | 0.5240±0.0196 | 0.9642±0.0025 | 0.7715±0.0071 |
| 4   | 332.4±1.3565 | 364    | 0.9132±0.0037 | 0.9396±0.0013 | 0.5872±0.0104 | 0.9615±0.0037 | 0.7934±0.0075 |
| 5   | 311.8±0.7483 | 332    | 0.9392±0.0023 | 0.9584±0.0020 | 0.7231±0.0192 | 0.9679±0.0017 | 0.8509±0.0065 |
| 6   | 272.2±1.4697 | 291    | 0.9354±0.0051 | 0.9392±0.0038 | 0.6471±0.0186 | 0.9735±0.0038 | 0.8323±0.0124 |
| 7   | 234.8±1.3266 | 250    | 0.9392±0.0053 | 0.9502±0.0023 | 0.6966±0.0258 | 0.9710±0.0054 | 0.8462±0.0122 |
| 8   | 188.6±0.4899 | 201    | 0.9383±0.0024 | 0.9418±0.0046 | 0.7167±0.0167 | 0.9684±0.0028 | 0.8501±0.0058 |
| 9   | 144.8±0.7483 | 159    | 0.9107±0.0047 | 0.9239±0.0031 | 0.6476±0.0381 | 0.9507±0.0029 | 0.8026±0.0132 |
| 10  | 121.8±0.7483 | 133    | 0.9158±0.0056 | 0.9165±0.0032 | 0.6875±0.0000 | 0.9470±0.0064 | 0.8074±0.0092 |
| 11  | 108.0±1.0954 | 117    | 0.9231±0.0094 | 0.9461±0.0034 | 0.6933±0.0327 | 0.9569±0.0078 | 0.8271±0.0191 |
| 12  | 91.6±1.0198  | 99     | 0.9253±0.0103 | 0.9462±0.0027 | 0.8154±0.0615 | 0.9419±0.0074 | 0.8485±0.0231 |
| 13  | 83.8±0.7483  | 91     | 0.9209±0.0082 | 0.9357±0.0046 | 0.7538±0.0308 | 0.9487±0.0081 | 0.8425±0.0154 |
| 14  | 71.2±0.7483  | 75     | 0.9493±0.0100 | 0.9812±0.0053 | 0.8833±0.0408 | 0.9619±0.0078 | 0.9087±0.0181 |
| 15  | 63.6±0.8000  | 67     | 0.9493±0.0119 | 0.9802±0.0044 | 0.8545±0.0445 | 0.9679±0.0134 | 0.9084±0.0200 |
| 16  | 55.2±0.7483  | 59     | 0.9356±0.0127 | 0.9694±0.0034 | 0.8000±0.0000 | 0.9633±0.0153 | 0.8852±0.0191 |
| 17  | 50.4±0.4899  | 54     | 0.9333±0.0091 | 0.9783±0.0077 | 0.8889±0.0000 | 0.9422±0.0109 | 0.8880±0.0132 |
| 18  | 43.4±0.8000  | 45     | 0.9644±0.0178 | 0.9939±0.0025 | 0.9500±0.0612 | 0.9676±0.0108 | 0.9413±0.0294 |
| 19  | 37.0±0.0000  | 38     | 0.9737±0.0000 | 0.9896±0.0000 | 1.0000±0.0000 | 0.9688±0.0000 | 0.9536±0.0000 |
| 20  | 34.0±0.0000  | 35     | 0.9714±0.0000 | 0.9943±0.0000 | 1.0000±0.0000 | 0.9655±0.0000 | 0.9528±0.0000 |

Table 105: H12O SVC applying laboratory reference values, results of CV, taking best model of grid using accuracy. Predictions from admission.

| Day | Corrects     | Totals | Accuracy      | AUC           | Sensitivity   | Specificity   | F1            |
|-----|--------------|--------|---------------|---------------|---------------|---------------|---------------|
| 1   | 364.4±0.4899 | 374    | 0.9743±0.0013 | 0.9907±0.0009 | 0.8880±0.0098 | 0.9877±0.0000 | 0.9438±0.0031 |
| 2   | 363.4±0.4899 | 374    | 0.9717±0.0013 | 0.9919±0.0006 | 0.9040±0.0150 | 0.9821±0.0012 | 0.9393±0.0032 |
| 3   | 361.4±0.4899 | 374    | 0.9663±0.0013 | 0.9904±0.0006 | 0.8600±0.0000 | 0.9827±0.0015 | 0.9264±0.0026 |
| 4   | 349.8±1.3266 | 364    | 0.9610±0.0036 | 0.9763±0.0020 | 0.8596±0.0104 | 0.9760±0.0032 | 0.9141±0.0076 |
| 5   | 313.6±0.8000 | 332    | 0.9446±0.0024 | 0.9667±0.0025 | 0.6923±0.0162 | 0.9782±0.0017 | 0.8573±0.0067 |
| 6   | 274.0±1.6733 | 291    | 0.9416±0.0058 | 0.9545±0.0023 | 0.6824±0.0390 | 0.9759±0.0029 | 0.8493±0.0166 |
| 7   | 233.0±1.0954 | 250    | 0.9320±0.0044 | 0.9342±0.0069 | 0.5793±0.0258 | 0.9783±0.0053 | 0.8131±0.0107 |
| 8   | 184.2±0.9798 | 201    | 0.9164±0.0049 | 0.8910±0.0105 | 0.4833±0.0333 | 0.9751±0.0085 | 0.7667±0.0091 |
| 9   | 140.2±1.1662 | 159    | 0.8818±0.0073 | 0.8355±0.0077 | 0.3714±0.0356 | 0.9594±0.0074 | 0.6934±0.0187 |
| 10  | 117.6±0.8000 | 133    | 0.8842±0.0060 | 0.8550±0.0055 | 0.2125±0.0306 | 0.9761±0.0064 | 0.6212±0.0189 |
| 11  | 100.8±1.1662 | 117    | 0.8615±0.0100 | 0.8082±0.0118 | 0.1867±0.0267 | 0.9608±0.0107 | 0.5903±0.0201 |
| 12  | 87.2±1.6000  | 99     | 0.8808±0.0162 | 0.8174±0.0114 | 0.1846±0.1043 | 0.9860±0.0047 | 0.6072±0.0750 |
| 13  | 78.8±0.7483  | 91     | 0.8659±0.0082 | 0.8002±0.0165 | 0.1385±0.0897 | 0.9872±0.0081 | 0.5703±0.0676 |
| 14  | 63.8±0.4000  | 75     | 0.8507±0.0053 | 0.7963±0.0137 | 0.1000±0.0333 | 0.9937±0.0078 | 0.5460±0.0236 |
| 15  | 54.8±0.9798  | 67     | 0.8179±0.0146 | 0.7474±0.0248 | 0.0364±0.0445 | 0.9714±0.0087 | 0.4804±0.0417 |
| 16  | 48.4±0.4899  | 59     | 0.8203±0.0083 | 0.6388±0.0124 | 0.0400±0.0490 | 0.9796±0.0129 | 0.4823±0.0394 |
| 17  | 44.8±0.4000  | 54     | 0.8296±0.0074 | 0.6894±0.0128 | 0.0000±0.0000 | 0.9956±0.0089 | 0.4534±0.0022 |
| 18  | 36.2±0.7483  | 45     | 0.8044±0.0166 | 0.7872±0.0315 | 0.0000±0.0000 | 0.9784±0.0202 | 0.4458±0.0051 |
| 19  | 31.6±0.4899  | 38     | 0.8316±0.0129 | 0.6573±0.0306 | 0.0000±0.0000 | 0.9875±0.0153 | 0.4540±0.0039 |
| 20  | 30.0±0.0000  | 35     | 0.8571±0.0000 | 0.7494±0.0340 | 0.1667±0.0000 | 1.0000±0.0000 | 0.6032±0.0000 |

Table 106: H12O SVC applying laboratory reference values, results of CV, taking best model of grid using accuracy. Predictions from outcome.

| Day | Corrects     | Totals | Accuracy      | AUC           | Sensitivity   | Specificity   | F1            |
|-----|--------------|--------|---------------|---------------|---------------|---------------|---------------|
| 1   | 327.2±1.9391 | 374    | 0.8749±0.0052 | 0.8507±0.0039 | 0.4080±0.0299 | 0.9469±0.0036 | 0.6973±0.0150 |
| 2   | 331.0±3.0332 | 374    | 0.8850±0.0081 | 0.9043±0.0094 | 0.5640±0.0294 | 0.9346±0.0074 | 0.7506±0.0158 |
| 3   | 335.0±0.6325 | 374    | 0.8957±0.0017 | 0.8973±0.0036 | 0.5840±0.0196 | 0.9438±0.0023 | 0.7697±0.0059 |
| 4   | 330.4±1.3565 | 364    | 0.9077±0.0037 | 0.9253±0.0041 | 0.6809±0.0135 | 0.9413±0.0047 | 0.8013±0.0060 |
| 5   | 308.8±1.4697 | 332    | 0.9301±0.0044 | 0.9561±0.0045 | 0.7795±0.0476 | 0.9502±0.0063 | 0.8417±0.0115 |
| 6   | 271.0±2.6077 | 291    | 0.9313±0.0090 | 0.9330±0.0061 | 0.8118±0.0300 | 0.9471±0.0087 | 0.8475±0.0175 |
| 7   | 229.6±1.0198 | 250    | 0.9184±0.0041 | 0.9337±0.0104 | 0.7724±0.0169 | 0.9376±0.0034 | 0.8201±0.0084 |
| 8   | 182.2±0.9798 | 201    | 0.9065±0.0049 | 0.9433±0.0094 | 0.7417±0.0312 | 0.9288±0.0077 | 0.8001±0.0080 |
| 9   | 138.0±1.2649 | 159    | 0.8679±0.0080 | 0.8973±0.0092 | 0.6381±0.0233 | 0.9029±0.0074 | 0.7416±0.0132 |
| 10  | 114.8±1.6000 | 133    | 0.8632±0.0120 | 0.8734±0.0187 | 0.6750±0.0612 | 0.8889±0.0076 | 0.7309±0.0246 |
| 11  | 102.4±0.8000 | 117    | 0.8752±0.0068 | 0.8868±0.0069 | 0.6400±0.0327 | 0.9098±0.0073 | 0.7475±0.0126 |
| 12  | 87.4±0.4899  | 99     | 0.8828±0.0049 | 0.9111±0.0138 | 0.7385±0.0377 | 0.9047±0.0087 | 0.7769±0.0080 |
| 13  | 78.6±1.9596  | 91     | 0.8637±0.0215 | 0.9039±0.0082 | 0.7385±0.0615 | 0.8846±0.0199 | 0.7630±0.0342 |
| 14  | 66.2±0.9798  | 75     | 0.8827±0.0131 | 0.9569±0.0058 | 0.8500±0.0624 | 0.8889±0.0266 | 0.8131±0.0103 |
| 15  | 60.4±0.4899  | 67     | 0.9015±0.0073 | 0.9571±0.0064 | 0.9091±0.0000 | 0.9000±0.0087 | 0.8453±0.0094 |
| 16  | 52.8±0.4000  | 59     | 0.8949±0.0068 | 0.9641±0.0082 | 0.9000±0.0000 | 0.8939±0.0082 | 0.8389±0.0083 |
| 17  | 49.6±1.0198  | 54     | 0.9185±0.0189 | 0.9704±0.0077 | 0.9333±0.0544 | 0.9156±0.0166 | 0.8711±0.0284 |
| 18  | 41.8±0.7483  | 45     | 0.9289±0.0166 | 0.9912±0.0017 | 0.9000±0.0500 | 0.9351±0.0132 | 0.8870±0.0256 |
| 19  | 36.2±0.7483  | 38     | 0.9526±0.0197 | 0.9938±0.0021 | 1.0000±0.0000 | 0.9437±0.0234 | 0.9215±0.0295 |
| 20  | 34.0±0.0000  | 35     | 0.9714±0.0000 | 1.0000±0.0000 | 1.0000±0.0000 | 0.9655±0.0000 | 0.9528±0.0000 |

Table 107: H12O SVC applying laboratory reference values, results of CV, taking best model of grid using F1. Predictions from admission.



| Day | Corrects     | Totals | Accuracy      | AUC           | Sensitivity   | Specificity   | F1            |
|-----|--------------|--------|---------------|---------------|---------------|---------------|---------------|
| 1   | 363.8±1.3266 | 374    | 0.9727±0.0035 | 0.9884±0.0037 | 0.8720±0.0098 | 0.9883±0.0036 | 0.9398±0.0074 |
| 2   | 364.0±1.2649 | 374    | 0.9733±0.0034 | 0.9924±0.0016 | 0.9200±0.0000 | 0.9815±0.0039 | 0.9433±0.0065 |
| 3   | 360.4±1.9596 | 374    | 0.9636±0.0052 | 0.9876±0.0016 | 0.8640±0.0233 | 0.9790±0.0036 | 0.9215±0.0114 |
| 4   | 348.2±1.3266 | 364    | 0.9566±0.0036 | 0.9763±0.0027 | 0.9064±0.0104 | 0.9640±0.0047 | 0.9093±0.0065 |
| 5   | 314.6±3.7202 | 332    | 0.9476±0.0112 | 0.9576±0.0035 | 0.7590±0.0528 | 0.9727±0.0057 | 0.8715±0.0281 |
| 6   | 269.6±1.3565 | 291    | 0.9265±0.0047 | 0.9546±0.0025 | 0.7471±0.0235 | 0.9502±0.0045 | 0.8308±0.0102 |
| 7   | 231.6±0.4899 | 250    | 0.9264±0.0020 | 0.9156±0.0033 | 0.6621±0.0138 | 0.9611±0.0036 | 0.8173±0.0028 |
| 8   | 179.0±2.2804 | 201    | 0.8905±0.0113 | 0.8780±0.0177 | 0.6083±0.0333 | 0.9288±0.0092 | 0.7541±0.0220 |
| 9   | 135.8±3.7630 | 159    | 0.8541±0.0237 | 0.8100±0.0143 | 0.5048±0.0381 | 0.9072±0.0273 | 0.6978±0.0305 |
| 10  | 110.6±1.0198 | 133    | 0.8316±0.0077 | 0.8234±0.0180 | 0.4250±0.0729 | 0.8872±0.0064 | 0.6393±0.0250 |
| 11  | 96.6±1.3565  | 117    | 0.8256±0.0116 | 0.7275±0.0329 | 0.4400±0.0533 | 0.8824±0.0062 | 0.6454±0.0253 |
| 12  | 78.0±1.7889  | 99     | 0.7879±0.0181 | 0.7776±0.0089 | 0.3692±0.1323 | 0.8512±0.0200 | 0.5910±0.0482 |
| 13  | 71.2±2.3152  | 91     | 0.7824±0.0254 | 0.7385±0.0214 | 0.4615±0.1088 | 0.8359±0.0150 | 0.6220±0.0483 |
| 14  | 58.2±2.2271  | 75     | 0.7760±0.0297 | 0.7627±0.0261 | 0.3667±0.0408 | 0.8540±0.0339 | 0.6052±0.0323 |
| 15  | 53.2±0.9798  | 67     | 0.7940±0.0146 | 0.6380±0.0153 | 0.3818±0.1060 | 0.8750±0.0113 | 0.6250±0.0424 |
| 16  | 44.8±0.7483  | 59     | 0.7593±0.0127 | 0.5412±0.0353 | 0.2000±0.0632 | 0.8735±0.0153 | 0.5374±0.0310 |
| 17  | 39.2±1.1662  | 54     | 0.7259±0.0216 | 0.5620±0.0242 | 0.0444±0.0544 | 0.8622±0.0166 | 0.4457±0.0377 |
| 18  | 33.6±2.2450  | 45     | 0.7467±0.0499 | 0.7196±0.0468 | 0.3000±0.1000 | 0.8432±0.0397 | 0.5730±0.0738 |
| 19  | 27.4±1.0198  | 38     | 0.7211±0.0268 | 0.5427±0.0506 | 0.2000±0.0667 | 0.8187±0.0364 | 0.5069±0.0240 |
| 20  | 27.6±0.8000  | 35     | 0.7886±0.0229 | 0.6379±0.0416 | 0.3333±0.1054 | 0.8828±0.0169 | 0.6099±0.0532 |

Table 108: H12O SVC applying laboratory reference values, results of CV, taking best model of grid using F1. Predictions from outcome.

### 3.3 Ensemble Daily Results

| Day | Corrects     | Totals | Accuracy      | AUC           | Sensitivity   | Specificity   | F1            |
|-----|--------------|--------|---------------|---------------|---------------|---------------|---------------|
| 1   | 329.8±4.0249 | 374    | 0.8818±0.0108 | 0.7826±0.0089 | 0.5600±0.0510 | 0.9315±0.0179 | 0.7453±0.0131 |
| 2   | 331.0±1.5811 | 374    | 0.8850±0.0042 | 0.8280±0.0264 | 0.6040±0.0434 | 0.9284±0.0055 | 0.7585±0.0123 |
| 3   | 338.6±1.6733 | 374    | 0.9053±0.0045 | 0.8546±0.0201 | 0.6600±0.0400 | 0.9432±0.0104 | 0.7980±0.0056 |
| 4   | 337.8±1.4832 | 364    | 0.9280±0.0041 | 0.8932±0.0143 | 0.7532±0.0415 | 0.9539±0.0073 | 0.8441±0.0092 |
| 5   | 313.6±1.8166 | 332    | 0.9446±0.0055 | 0.9060±0.0196 | 0.7641±0.0215 | 0.9686±0.0074 | 0.8665±0.0103 |
| 6   | 273.4±2.5100 | 291    | 0.9395±0.0086 | 0.8912±0.0151 | 0.7529±0.0335 | 0.9642±0.0075 | 0.8551±0.0193 |
| 7   | 234.2±2.1679 | 250    | 0.9368±0.0087 | 0.9059±0.0083 | 0.7793±0.0523 | 0.9575±0.0082 | 0.8524±0.0196 |
| 8   | 185.6±1.5166 | 201    | 0.9234±0.0075 | 0.8819±0.0087 | 0.7667±0.0228 | 0.9446±0.0084 | 0.8306±0.0137 |
| 9   | 145.6±1.1402 | 159    | 0.9157±0.0072 | 0.8789±0.0293 | 0.7238±0.0522 | 0.9449±0.0083 | 0.8224±0.0161 |
| 10  | 121.6±2.0736 | 133    | 0.9143±0.0156 | 0.8850±0.0203 | 0.7125±0.0559 | 0.9419±0.0213 | 0.8093±0.0227 |
| 11  | 108.0±1.7321 | 117    | 0.9231±0.0148 | 0.8915±0.0165 | 0.7600±0.0365 | 0.9471±0.0203 | 0.8370±0.0207 |
| 12  | 91.6±2.3022  | 99     | 0.9253±0.0233 | 0.9212±0.0197 | 0.8462±0.0000 | 0.9372±0.0268 | 0.8539±0.0354 |
| 13  | 84.6±0.8944  | 91     | 0.9297±0.0098 | 0.9395±0.0034 | 0.9231±0.0000 | 0.9308±0.0115 | 0.8739±0.0143 |
| 14  | 70.8±1.3038  | 75     | 0.9440±0.0174 | 0.9845±0.0010 | 0.9667±0.0456 | 0.9397±0.0207 | 0.9067±0.0260 |
| 15  | 63.4±0.8944  | 67     | 0.9463±0.0133 | 0.9849±0.0019 | 0.9818±0.0407 | 0.9393±0.0098 | 0.9121±0.0217 |
| 16  | 55.6±0.8944  | 59     | 0.9424±0.0152 | 0.9867±0.0062 | 1.0000±0.0000 | 0.9306±0.0183 | 0.9098±0.0205 |
| 17  | 52.2±0.8367  | 54     | 0.9667±0.0155 | 0.9993±0.0011 | 1.0000±0.0000 | 0.9600±0.0186 | 0.9449±0.0239 |
| 18  | 43.2±0.8367  | 45     | 0.9600±0.0186 | 0.9966±0.0000 | 0.9750±0.0559 | 0.9568±0.0242 | 0.9364±0.0274 |
| 19  | 36.2±0.4472  | 38     | 0.9526±0.0118 | 0.9938±0.0023 | 0.9667±0.0745 | 0.9500±0.0171 | 0.9184±0.0203 |
| 20  | 33.0±0.0000  | 35     | 0.9429±0.0000 | 0.9943±0.0000 | 0.8667±0.0745 | 0.9586±0.0154 | 0.9017±0.0050 |

Table 109: H12O RNN-Ensemble-F1, using accuracy to choose models. Predictions from admission.

| Day | Corrects     | Totals | Accuracy      | AUC           | Sensitivity   | Specificity   | F1            |
|-----|--------------|--------|---------------|---------------|---------------|---------------|---------------|
| 1   | 365.0±2.5495 | 374    | 0.9759±0.0068 | 0.9784±0.0066 | 0.9240±0.0089 | 0.9840±0.0091 | 0.9489±0.0129 |
| 2   | 368.4±1.8166 | 374    | 0.9850±0.0049 | 0.9876±0.0006 | 0.9680±0.0179 | 0.9877±0.0058 | 0.9684±0.0099 |
| 3   | 367.6±1.1402 | 374    | 0.9829±0.0030 | 0.9843±0.0042 | 0.9560±0.0261 | 0.9870±0.0040 | 0.9637±0.0066 |
| 4   | 353.2±1.0954 | 364    | 0.9703±0.0030 | 0.9728±0.0108 | 0.9106±0.0350 | 0.9792±0.0042 | 0.9354±0.0072 |
| 5   | 315.4±1.8166 | 332    | 0.9500±0.0055 | 0.9090±0.0107 | 0.7282±0.0532 | 0.9795±0.0024 | 0.8725±0.0172 |
| 6   | 275.0±1.5811 | 291    | 0.9450±0.0054 | 0.9141±0.0266 | 0.7412±0.0483 | 0.9720±0.0075 | 0.8639±0.0138 |
| 7   | 230.2±0.8367 | 250    | 0.9208±0.0033 | 0.8596±0.0246 | 0.6414±0.0523 | 0.9575±0.0052 | 0.8036±0.0138 |
| 8   | 181.8±0.8367 | 201    | 0.9045±0.0042 | 0.8113±0.0196 | 0.5833±0.0659 | 0.9480±0.0074 | 0.7688±0.0180 |
| 9   | 137.0±0.7071 | 159    | 0.8616±0.0044 | 0.7599±0.0438 | 0.5048±0.0722 | 0.9159±0.0110 | 0.7044±0.0188 |
| 10  | 118.8±0.4472 | 133    | 0.8932±0.0034 | 0.8118±0.0283 | 0.6000±0.0559 | 0.9333±0.0111 | 0.7565±0.0071 |
| 11  | 99.8±1.0954  | 117    | 0.8530±0.0094 | 0.7375±0.0284 | 0.4800±0.0298 | 0.9078±0.0149 | 0.6854±0.0051 |
| 12  | 83.8±1.3038  | 99     | 0.8465±0.0132 | 0.7465±0.0171 | 0.5538±0.0644 | 0.8907±0.0195 | 0.6978±0.0189 |
| 13  | 73.4±1.8166  | 91     | 0.8066±0.0200 | 0.7104±0.0188 | 0.5538±0.0344 | 0.8487±0.0278 | 0.6666±0.0155 |
| 14  | 58.6±2.0736  | 75     | 0.7813±0.0276 | 0.7116±0.0148 | 0.4667±0.1264 | 0.8413±0.0355 | 0.6341±0.0427 |
| 15  | 50.4±1.3416  | 67     | 0.7522±0.0200 | 0.7195±0.0299 | 0.5455±0.0000 | 0.7929±0.0240 | 0.6313±0.0168 |
| 16  | 45.6±2.3022  | 59     | 0.7729±0.0390 | 0.6908±0.0083 | 0.5000±0.0000 | 0.8286±0.0470 | 0.6443±0.0354 |
| 17  | 41.4±1.3416  | 54     | 0.7667±0.0248 | 0.7279±0.0054 | 0.6222±0.0609 | 0.7956±0.0365 | 0.6604±0.0201 |
| 18  | 34.2±1.9235  | 45     | 0.7600±0.0427 | 0.7473±0.0102 | 0.7500±0.0000 | 0.7622±0.0520 | 0.6838±0.0379 |
| 19  | 24.8±1.0954  | 38     | 0.6526±0.0288 | 0.5948±0.0412 | 0.2333±0.0913 | 0.7312±0.0356 | 0.4763±0.0333 |
| 20  | 25.4±1.5166  | 35     | 0.7257±0.0433 | 0.4948±0.0317 | 0.2333±0.0913 | 0.8276±0.0597 | 0.5276±0.0399 |

Table 110: H12O RNN-Ensemble-F1, using accuracy to choose models. Predictions from outcome.

| Day | Corrects     | Totals | Accuracy      | AUC           | Sensitivity   | Specificity   | F1            |
|-----|--------------|--------|---------------|---------------|---------------|---------------|---------------|
| 1   | 329.6±3.1305 | 374    | 0.8813±0.0084 | 0.7685±0.0083 | 0.5360±0.0261 | 0.9346±0.0128 | 0.7394±0.0084 |
| 2   | 331.4±1.9494 | 374    | 0.8861±0.0052 | 0.8267±0.0281 | 0.6040±0.0555 | 0.9296±0.0116 | 0.7598±0.0111 |
| 3   | 337.8±2.9496 | 374    | 0.9032±0.0079 | 0.8561±0.0135 | 0.6400±0.0374 | 0.9438±0.0126 | 0.7915±0.0110 |
| 4   | 337.6±3.6469 | 364    | 0.9275±0.0100 | 0.8856±0.0140 | 0.7277±0.0409 | 0.9571±0.0133 | 0.8401±0.0174 |
| 5   | 313.6±1.6733 | 332    | 0.9446±0.0050 | 0.9080±0.0185 | 0.7590±0.0389 | 0.9693±0.0087 | 0.8658±0.0096 |
| 6   | 274.2±0.4472 | 291    | 0.9423±0.0015 | 0.8876±0.0319 | 0.7529±0.0492 | 0.9673±0.0065 | 0.8599±0.0070 |
| 7   | 234.2±1.6432 | 250    | 0.9368±0.0066 | 0.9024±0.0238 | 0.7586±0.0545 | 0.9602±0.0038 | 0.8496±0.0184 |
| 8   | 186.8±1.7889 | 201    | 0.9294±0.0089 | 0.8812±0.0077 | 0.8000±0.0186 | 0.9469±0.0124 | 0.8451±0.0129 |
| 9   | 146.4±1.1402 | 159    | 0.9208±0.0072 | 0.8827±0.0249 | 0.7429±0.0722 | 0.9478±0.0119 | 0.8328±0.0170 |
| 10  | 121.6±1.5166 | 133    | 0.9143±0.0114 | 0.8800±0.0268 | 0.7125±0.0342 | 0.9419±0.0164 | 0.8092±0.0146 |
| 11  | 108.4±0.8944 | 117    | 0.9265±0.0076 | 0.8919±0.0173 | 0.8133±0.0298 | 0.9431±0.0128 | 0.8485±0.0093 |
| 12  | 91.0±1.2247  | 99     | 0.9192±0.0124 | 0.9102±0.0143 | 0.8308±0.0344 | 0.9326±0.0152 | 0.8415±0.0189 |
| 13  | 83.6±1.3416  | 91     | 0.9187±0.0147 | 0.9285±0.0194 | 0.8923±0.0421 | 0.9231±0.0157 | 0.8549±0.0233 |
| 14  | 70.2±1.3038  | 75     | 0.9360±0.0174 | 0.9774±0.0170 | 0.9333±0.0697 | 0.9365±0.0224 | 0.8925±0.0266 |
| 15  | 62.8±0.8367  | 67     | 0.9373±0.0125 | 0.9765±0.0204 | 0.9455±0.0498 | 0.9357±0.0160 | 0.8969±0.0189 |
| 16  | 55.2±0.8367  | 59     | 0.9356±0.0142 | 0.9863±0.0044 | 1.0000±0.0000 | 0.9224±0.0171 | 0.9004±0.0193 |
| 17  | 51.8±1.0954  | 54     | 0.9593±0.0203 | 0.9973±0.0020 | 1.0000±0.0000 | 0.9511±0.0243 | 0.9340±0.0298 |
| 18  | 42.4±0.8944  | 45     | 0.9422±0.0199 | 0.9943±0.0028 | 0.9500±0.0685 | 0.9405±0.0226 | 0.9092±0.0297 |
| 19  | 36.6±0.5477  | 38     | 0.9632±0.0144 | 0.9953±0.0022 | 0.9333±0.0913 | 0.9688±0.0221 | 0.9335±0.0249 |
| 20  | 33.4±0.5477  | 35     | 0.9543±0.0156 | 0.9776±0.0389 | 0.9333±0.0913 | 0.9586±0.0154 | 0.9230±0.0275 |

Table 111: H12O RNN-Ensemble-F1, using F1 to choose models. Predictions from admission.

| Day | Corrects     | Totals | Accuracy      | AUC           | Sensitivity   | Specificity   | F1            |
|-----|--------------|--------|---------------|---------------|---------------|---------------|---------------|
| 1   | 366.0±3.0822 | 374    | 0.9786±0.0082 | 0.9762±0.0106 | 0.9320±0.0228 | 0.9858±0.0094 | 0.9545±0.0162 |
| 2   | 367.6±2.5100 | 374    | 0.9829±0.0067 | 0.9875±0.0008 | 0.9560±0.0261 | 0.9870±0.0088 | 0.9639±0.0133 |
| 3   | 365.6±2.4083 | 374    | 0.9775±0.0064 | 0.9834±0.0048 | 0.9320±0.0228 | 0.9846±0.0062 | 0.9522±0.0132 |
| 4   | 352.8±1.6432 | 364    | 0.9692±0.0045 | 0.9693±0.0139 | 0.8936±0.0261 | 0.9804±0.0088 | 0.9325±0.0074 |
| 5   | 316.6±1.1402 | 332    | 0.9536±0.0034 | 0.9038±0.0128 | 0.7590±0.0344 | 0.9795±0.0042 | 0.8836±0.0095 |
| 6   | 275.2±2.3875 | 291    | 0.9457±0.0082 | 0.9108±0.0379 | 0.7353±0.0857 | 0.9735±0.0058 | 0.8637±0.0262 |
| 7   | 229.6±1.1402 | 250    | 0.9184±0.0046 | 0.8612±0.0319 | 0.6276±0.0617 | 0.9566±0.0052 | 0.7969±0.0174 |
| 8   | 181.8±1.6432 | 201    | 0.9045±0.0082 | 0.7988±0.0413 | 0.5917±0.0456 | 0.9469±0.0103 | 0.7711±0.0169 |
| 9   | 136.6±0.8944 | 159    | 0.8591±0.0056 | 0.7525±0.0383 | 0.4952±0.1043 | 0.9145±0.0119 | 0.6981±0.0289 |
| 10  | 118.6±0.8944 | 133    | 0.8917±0.0067 | 0.8163±0.0550 | 0.6125±0.1118 | 0.9299±0.0111 | 0.7554±0.0298 |
| 11  | 98.4±1.8166  | 117    | 0.8410±0.0155 | 0.7295±0.0401 | 0.4533±0.0558 | 0.8980±0.0226 | 0.6649±0.0178 |
| 12  | 83.4±1.5166  | 99     | 0.8424±0.0153 | 0.7566±0.0222 | 0.5846±0.0688 | 0.8814±0.0208 | 0.6999±0.0210 |
| 13  | 73.0±2.9155  | 91     | 0.8022±0.0320 | 0.7000±0.0147 | 0.5385±0.0000 | 0.8462±0.0374 | 0.6599±0.0294 |
| 14  | 58.6±2.3022  | 75     | 0.7813±0.0307 | 0.6939±0.0206 | 0.4167±0.0589 | 0.8508±0.0429 | 0.6231±0.0253 |
| 15  | 51.0±1.4142  | 67     | 0.7612±0.0211 | 0.7011±0.0253 | 0.5636±0.0407 | 0.8000±0.0319 | 0.6426±0.0136 |
| 16  | 46.6±1.6733  | 59     | 0.7898±0.0284 | 0.6980±0.0154 | 0.5200±0.0447 | 0.8449±0.0398 | 0.6634±0.0235 |
| 17  | 41.0±1.8708  | 54     | 0.7593±0.0346 | 0.7128±0.0243 | 0.4889±0.0609 | 0.8133±0.0404 | 0.6270±0.0376 |
| 18  | 34.4±1.9494  | 45     | 0.7644±0.0433 | 0.7503±0.0203 | 0.6750±0.1118 | 0.7838±0.0573 | 0.6747±0.0420 |
| 19  | 26.2±1.0954  | 38     | 0.6895±0.0288 | 0.5630±0.0603 | 0.2667±0.1491 | 0.7688±0.0523 | 0.5053±0.0369 |
| 20  | 25.6±1.3416  | 35     | 0.7314±0.0383 | 0.5161±0.0465 | 0.2000±0.0745 | 0.8414±0.0393 | 0.5211±0.0470 |

Table 112: H12O RNN-Ensemble-F1, using F1 to choose models. Predictions from outcome.

| Day | Corrects     | Totals | Accuracy      | AUC           | Sensitivity   | Specificity   | F1            |
|-----|--------------|--------|---------------|---------------|---------------|---------------|---------------|
| 1   | 322.2±7.3621 | 374    | 0.8615±0.0197 | 0.7683±0.0203 | 0.6080±0.0502 | 0.9006±0.0276 | 0.7297±0.0212 |
| 2   | 328.4±3.9115 | 374    | 0.8781±0.0105 | 0.8175±0.0241 | 0.7000±0.0529 | 0.9056±0.0146 | 0.7666±0.0165 |
| 3   | 336.0±4.7958 | 374    | 0.8984±0.0128 | 0.8355±0.0220 | 0.7200±0.0490 | 0.9259±0.0181 | 0.7977±0.0180 |
| 4   | 336.0±3.8079 | 364    | 0.9231±0.0105 | 0.8908±0.0162 | 0.8170±0.0323 | 0.9388±0.0108 | 0.8441±0.0185 |
| 5   | 309.6±2.7928 | 332    | 0.9325±0.0084 | 0.8878±0.0123 | 0.8000±0.0281 | 0.9502±0.0129 | 0.8489±0.0115 |
| 6   | 270.6±3.0496 | 291    | 0.9299±0.0105 | 0.8752±0.0227 | 0.7765±0.0446 | 0.9502±0.0093 | 0.8407±0.0220 |
| 7   | 231.2±2.7749 | 250    | 0.9248±0.0111 | 0.8929±0.0164 | 0.8207±0.0378 | 0.9385±0.0152 | 0.8372±0.0167 |
| 8   | 185.0±0.7071 | 201    | 0.9204±0.0035 | 0.8819±0.0080 | 0.8000±0.0186 | 0.9367±0.0062 | 0.8300±0.0041 |
| 9   | 144.8±1.0954 | 159    | 0.9107±0.0069 | 0.8528±0.0190 | 0.7429±0.0426 | 0.9362±0.0139 | 0.8176±0.0060 |
| 10  | 120.8±2.7749 | 133    | 0.9083±0.0209 | 0.8638±0.0147 | 0.7625±0.0280 | 0.9282±0.0223 | 0.8079±0.0318 |
| 11  | 105.8±1.3038 | 117    | 0.9043±0.0111 | 0.8748±0.0333 | 0.7867±0.0730 | 0.9216±0.0183 | 0.8109±0.0168 |
| 12  | 90.2±1.9235  | 99     | 0.9111±0.0194 | 0.9153±0.0176 | 0.8615±0.0344 | 0.9186±0.0201 | 0.8333±0.0293 |
| 13  | 83.6±1.1402  | 91     | 0.9187±0.0125 | 0.9403±0.0034 | 0.9231±0.0000 | 0.9179±0.0146 | 0.8580±0.0178 |
| 14  | 69.2±2.1679  | 75     | 0.9227±0.0289 | 0.9860±0.0019 | 1.0000±0.0000 | 0.9079±0.0344 | 0.8801±0.0379 |
| 15  | 62.4±1.3416  | 67     | 0.9313±0.0200 | 0.9860±0.0016 | 1.0000±0.0000 | 0.9179±0.0240 | 0.8929±0.0273 |
| 16  | 54.4±0.8944  | 59     | 0.9220±0.0152 | 0.9882±0.0051 | 1.0000±0.0000 | 0.9061±0.0183 | 0.8823±0.0195 |
| 17  | 51.0±1.5811  | 54     | 0.9444±0.0293 | 1.0000±0.0000 | 1.0000±0.0000 | 0.9333±0.0351 | 0.9132±0.0420 |
| 18  | 42.4±1.1402  | 45     | 0.9422±0.0253 | 0.9966±0.0012 | 1.0000±0.0000 | 0.9297±0.0308 | 0.9131±0.0352 |
| 19  | 36.0±0.7071  | 38     | 0.9474±0.0186 | 0.9776±0.0370 | 0.9667±0.0745 | 0.9437±0.0140 | 0.9103±0.0329 |
| 20  | 33.6±0.5477  | 35     | 0.9600±0.0156 | 0.9776±0.0357 | 0.9667±0.0745 | 0.9586±0.0154 | 0.9337±0.0264 |

Table 113: H12O RNN-Ensemble-SEN, using accuracy to choose models. Predictions from admission.

| Day | Corrects     | Totals | Accuracy      | AUC           | Sensitivity   | Specificity   | F1            |
|-----|--------------|--------|---------------|---------------|---------------|---------------|---------------|
| 1   | 364.0±2.5495 | 374    | 0.9733±0.0068 | 0.9726±0.0108 | 0.9480±0.0228 | 0.9772±0.0099 | 0.9448±0.0123 |
| 2   | 366.8±2.2804 | 374    | 0.9807±0.0061 | 0.9839±0.0056 | 0.9720±0.0110 | 0.9821±0.0074 | 0.9601±0.0119 |
| 3   | 365.6±2.4083 | 374    | 0.9775±0.0064 | 0.9843±0.0043 | 0.9760±0.0089 | 0.9778±0.0080 | 0.9540±0.0122 |
| 4   | 352.0±1.5811 | 364    | 0.9670±0.0043 | 0.9650±0.0139 | 0.9404±0.0277 | 0.9710±0.0068 | 0.9307±0.0082 |
| 5   | 316.6±1.5166 | 332    | 0.9536±0.0046 | 0.8894±0.0228 | 0.7949±0.0480 | 0.9747±0.0075 | 0.8873±0.0109 |
| 6   | 274.6±2.8810 | 291    | 0.9436±0.0099 | 0.9038±0.0390 | 0.8294±0.0816 | 0.9588±0.0115 | 0.8709±0.0236 |
| 7   | 229.8±1.6432 | 250    | 0.9192±0.0066 | 0.8409±0.0065 | 0.7172±0.0154 | 0.9457±0.0078 | 0.8137±0.0108 |
| 8   | 179.8±2.6833 | 201    | 0.8945±0.0133 | 0.7944±0.0148 | 0.6333±0.0349 | 0.9299±0.0181 | 0.7648±0.0166 |
| 9   | 135.0±2.0000 | 159    | 0.8491±0.0126 | 0.7367±0.0367 | 0.5524±0.0797 | 0.8942±0.0110 | 0.7008±0.0299 |
| 10  | 116.0±3.0822 | 133    | 0.8722±0.0232 | 0.7956±0.0177 | 0.6625±0.0342 | 0.9009±0.0268 | 0.7413±0.0295 |
| 11  | 97.6±4.2778  | 117    | 0.8342±0.0366 | 0.7130±0.0192 | 0.5200±0.0558 | 0.8804±0.0487 | 0.6754±0.0278 |
| 12  | 80.0±3.8079  | 99     | 0.8081±0.0385 | 0.7368±0.0337 | 0.6000±0.0843 | 0.8395±0.0516 | 0.6679±0.0340 |
| 13  | 71.0±1.8708  | 91     | 0.7802±0.0206 | 0.7104±0.0096 | 0.5538±0.0344 | 0.8179±0.0292 | 0.6417±0.0127 |
| 14  | 55.4±2.4083  | 75     | 0.7387±0.0321 | 0.6771±0.0312 | 0.5333±0.0950 | 0.7778±0.0526 | 0.6132±0.0195 |
| 15  | 48.2±2.6833  | 67     | 0.7194±0.0400 | 0.7192±0.0175 | 0.6364±0.0643 | 0.7357±0.0584 | 0.6205±0.0258 |
| 16  | 43.0±1.0000  | 59     | 0.7288±0.0169 | 0.6839±0.0182 | 0.5400±0.0548 | 0.7673±0.0310 | 0.6134±0.0060 |
| 17  | 40.2±1.7889  | 54     | 0.7444±0.0331 | 0.7323±0.0085 | 0.6667±0.0000 | 0.7600±0.0398 | 0.6493±0.0294 |
| 18  | 32.6±2.3022  | 45     | 0.7244±0.0512 | 0.7500±0.0130 | 0.7500±0.0000 | 0.7189±0.0622 | 0.6525±0.0436 |
| 19  | 23.6±1.1402  | 38     | 0.6211±0.0300 | 0.5792±0.0500 | 0.5333±0.1394 | 0.6375±0.0280 | 0.5224±0.0414 |
| 20  | 21.4±1.1402  | 35     | 0.6114±0.0326 | 0.4908±0.0380 | 0.2667±0.0913 | 0.6828±0.0450 | 0.4660±0.0311 |

Table 114: H12O RNN-Ensemble-SEN, using accuracy to choose models. Predictions from outcome.

| Day | Corrects     | Totals | Accuracy      | AUC           | Sensitivity   | Specificity   | F1            |
|-----|--------------|--------|---------------|---------------|---------------|---------------|---------------|
| 1   | 318.6±8.4735 | 374    | 0.8519±0.0227 | 0.7685±0.0083 | 0.6160±0.0297 | 0.8883±0.0305 | 0.7202±0.0199 |
| 2   | 328.6±1.9494 | 374    | 0.8786±0.0052 | 0.8267±0.0281 | 0.7200±0.0632 | 0.9031±0.0134 | 0.7703±0.0098 |
| 3   | 335.4±2.9665 | 374    | 0.8968±0.0079 | 0.8561±0.0135 | 0.7680±0.0335 | 0.9167±0.0133 | 0.8024±0.0087 |
| 4   | 330.8±2.7749 | 364    | 0.9088±0.0076 | 0.8856±0.0140 | 0.8128±0.0277 | 0.9230±0.0091 | 0.8218±0.0122 |
| 5   | 308.0±2.3452 | 332    | 0.9277±0.0071 | 0.9080±0.0185 | 0.8462±0.0405 | 0.9386±0.0128 | 0.8459±0.0081 |
| 6   | 267.4±3.4351 | 291    | 0.9189±0.0118 | 0.8876±0.0319 | 0.8059±0.0677 | 0.9339±0.0180 | 0.8262±0.0186 |
| 7   | 230.4±1.8166 | 250    | 0.9216±0.0073 | 0.9024±0.0238 | 0.8414±0.0523 | 0.9321±0.0147 | 0.8342±0.0067 |
| 8   | 182.4±1.8166 | 201    | 0.9075±0.0090 | 0.8812±0.0077 | 0.8000±0.0186 | 0.9220±0.0122 | 0.8102±0.0119 |
| 9   | 144.4±3.0496 | 159    | 0.9082±0.0192 | 0.8827±0.0249 | 0.8095±0.0583 | 0.9232±0.0283 | 0.8237±0.0243 |
| 10  | 118.8±2.5884 | 133    | 0.8932±0.0195 | 0.8800±0.0268 | 0.8125±0.0625 | 0.9043±0.0252 | 0.7926±0.0266 |
| 11  | 104.8±1.7889 | 117    | 0.8957±0.0153 | 0.8919±0.0173 | 0.8267±0.0365 | 0.9059±0.0203 | 0.8047±0.0191 |
| 12  | 89.2±2.1679  | 99     | 0.9010±0.0219 | 0.9102±0.0143 | 0.8615±0.0344 | 0.9070±0.0233 | 0.8192±0.0317 |
| 13  | 81.8±2.5884  | 91     | 0.8989±0.0284 | 0.9285±0.0194 | 0.9077±0.0344 | 0.8974±0.0339 | 0.8305±0.0373 |
| 14  | 67.6±2.0736  | 75     | 0.9013±0.0276 | 0.9774±0.0170 | 0.9833±0.0373 | 0.8857±0.0305 | 0.8506±0.0378 |
| 15  | 61.6±1.3416  | 67     | 0.9194±0.0200 | 0.9765±0.0204 | 0.9818±0.0407 | 0.9071±0.0233 | 0.8753±0.0275 |
| 16  | 54.0±0.7071  | 59     | 0.9153±0.0120 | 0.9863±0.0044 | 1.0000±0.0000 | 0.8980±0.0144 | 0.8734±0.0153 |
| 17  | 49.4±0.8944  | 54     | 0.9148±0.0166 | 0.9973±0.0020 | 1.0000±0.0000 | 0.8978±0.0199 | 0.8717±0.0209 |
| 18  | 41.6±0.5477  | 45     | 0.9244±0.0122 | 0.9943±0.0028 | 1.0000±0.0000 | 0.9081±0.0148 | 0.8885±0.0156 |
| 19  | 35.8±1.0954  | 38     | 0.9421±0.0288 | 0.9953±0.0022 | 1.0000±0.0000 | 0.9313±0.0342 | 0.9065±0.0404 |
| 20  | 32.2±0.8367  | 35     | 0.9200±0.0239 | 0.9776±0.0389 | 0.9667±0.0745 | 0.9103±0.0189 | 0.8777±0.0367 |

Table 115: H12O RNN-Ensemble-SEN, using F1 to choose models. Predictions from admission.

| Day | Corrects     | Totals | Accuracy      | AUC           | Sensitivity   | Specificity   | F1            |
|-----|--------------|--------|---------------|---------------|---------------|---------------|---------------|
| 1   | 360.6±3.5071 | 374    | 0.9642±0.0094 | 0.9762±0.0106 | 0.9560±0.0219 | 0.9654±0.0122 | 0.9284±0.0162 |
| 2   | 364.6±4.3932 | 374    | 0.9749±0.0117 | 0.9875±0.0008 | 0.9800±0.0000 | 0.9741±0.0136 | 0.9495±0.0214 |
| 3   | 363.4±2.6077 | 374    | 0.9717±0.0070 | 0.9834±0.0048 | 0.9760±0.0089 | 0.9710±0.0077 | 0.9429±0.0131 |
| 4   | 350.0±1.8708 | 364    | 0.9615±0.0051 | 0.9693±0.0139 | 0.9532±0.0277 | 0.9628±0.0096 | 0.9214±0.0079 |
| 5   | 315.4±2.3022 | 332    | 0.9500±0.0069 | 0.9038±0.0128 | 0.8256±0.0281 | 0.9666±0.0106 | 0.8836±0.0117 |
| 6   | 272.4±3.9749 | 291    | 0.9361±0.0137 | 0.9108±0.0379 | 0.8471±0.0761 | 0.9479±0.0115 | 0.8594±0.0301 |
| 7   | 228.4±1.6733 | 250    | 0.9136±0.0067 | 0.8612±0.0319 | 0.7655±0.0663 | 0.9330±0.0087 | 0.8111±0.0171 |
| 8   | 177.4±1.8166 | 201    | 0.8826±0.0090 | 0.7988±0.0413 | 0.6500±0.0913 | 0.9141±0.0209 | 0.7499±0.0119 |
| 9   | 134.8±1.0954 | 159    | 0.8478±0.0069 | 0.7525±0.0383 | 0.5905±0.0865 | 0.8870±0.0150 | 0.7071±0.0201 |
| 10  | 114.8±2.1679 | 133    | 0.8632±0.0163 | 0.8163±0.0550 | 0.7125±0.1218 | 0.8838±0.0323 | 0.7366±0.0170 |
| 11  | 95.4±3.2094  | 117    | 0.8154±0.0274 | 0.7295±0.0401 | 0.5867±0.0869 | 0.8490±0.0315 | 0.6691±0.0350 |
| 12  | 78.0±4.0000  | 99     | 0.7879±0.0404 | 0.7566±0.0222 | 0.6615±0.0421 | 0.8070±0.0462 | 0.6609±0.0397 |
| 13  | 68.4±1.1402  | 91     | 0.7516±0.0125 | 0.7000±0.0147 | 0.5538±0.0344 | 0.7846±0.0167 | 0.6166±0.0113 |
| 14  | 54.2±2.4900  | 75     | 0.7227±0.0332 | 0.6939±0.0206 | 0.6000±0.0697 | 0.7460±0.0502 | 0.6137±0.0193 |
| 15  | 45.2±2.7749  | 67     | 0.6746±0.0414 | 0.7011±0.0253 | 0.6182±0.0761 | 0.6857±0.0530 | 0.5814±0.0331 |
| 16  | 42.4±1.9494  | 59     | 0.7186±0.0330 | 0.6980±0.0154 | 0.5800±0.0447 | 0.7469±0.0423 | 0.6135±0.0274 |
| 17  | 39.0±1.2247  | 54     | 0.7222±0.0227 | 0.7128±0.0243 | 0.6444±0.0497 | 0.7378±0.0290 | 0.6259±0.0209 |
| 18  | 33.0±2.0000  | 45     | 0.7333±0.0444 | 0.7503±0.0203 | 0.7500±0.0000 | 0.7297±0.0541 | 0.6600±0.0383 |
| 19  | 23.4±1.5166  | 38     | 0.6158±0.0399 | 0.5630±0.0603 | 0.5000±0.1667 | 0.6375±0.0474 | 0.5119±0.0487 |
| 20  | 22.0±2.3452  | 35     | 0.6286±0.0670 | 0.5161±0.0465 | 0.3333±0.1179 | 0.6897±0.0879 | 0.4925±0.0476 |

Table 116: H12O RNN-Ensemble-SEN, using F1 to choose models. Predictions from outcome.
